# Supplementary material for: Atom-efficient chlorinative dearomatization of naphthol, quinolinol, and isoquinolinol derivatives using trichloroisocyanuric acid (TCCA)
Source: Royal Society of Chemistry journal article supplement (doi:10.1039/d4ob01894j), 2024-12-30
Supplement: d4ob01894j1.pdf [file d4ob01894j1.pdf]

**Experimental Supporting Information**

**Atom-Efficient Chlorinative Dearomatization of Naphthol, Quinolinol, and Isoquinolinol Derivatives using Trichloroisocyanuric Acid (TCCA)**

Jenna D. Caudle,<sup>a</sup> Marlow K. Ennis,<sup>a</sup> Dillon C. Dodge,<sup>a</sup> Audrey A. Iskandar,<sup>a</sup> Yesenia Portillo Urquiza,<sup>a</sup> David K. Seo,<sup>a</sup> Franklyn M. Wright,<sup>a</sup> Gordon H. Purser,<sup>a</sup> Daniele Leonori,<sup>b</sup> and Angus A. Lamar<sup>\*a</sup>

- a) Department of Chemistry and Biochemistry, The University of Tulsa, 800 S. Tucker Dr., Tulsa, OK 74104, USA.  
b) Institute of Organic Chemistry, RWTH Aachen University, Landoltweg 1, 52056 Aachen, Germany.

[angus-lamar@utulsa.edu](mailto:angus-lamar@utulsa.edu)

Index

|                                                                          |     |
|--------------------------------------------------------------------------|-----|
| Failed substrates – Figure S1                                            | S-1 |
| <i>In silico</i> modeling of coordination of DCCA to 1-chloro-2-naphthol | S-2 |
| <i>In silico</i> calculation of overall reaction mechanism               | S-3 |
| <sup>1</sup> H and <sup>13</sup> C NMR spectra of chlorinated products   | S-7 |

Substrates that failed or gave complex mixtures:

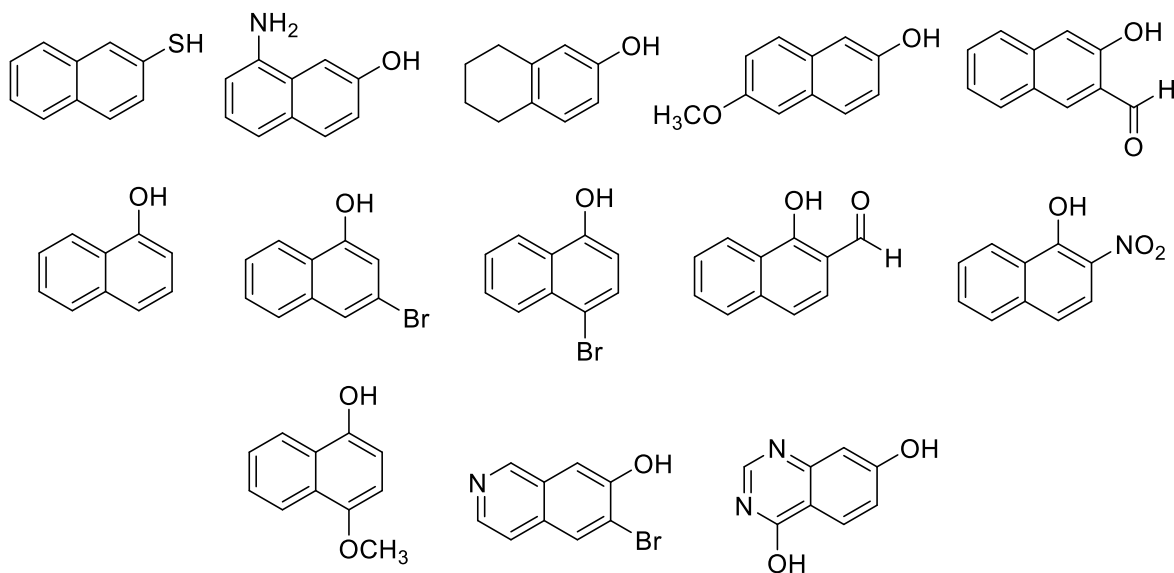

**Figure S1.** Substrates that failed or gave complex mixtures.

The interaction between 1-chloro-2-naphthol and DCCA was examined (HF-DFT SCF/ $\omega$ B97X-D/6-31G\*/C-PCM: acetonitrile as solvent).

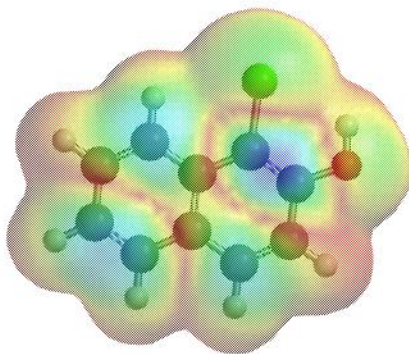

**Figure S2.** The availability of the HOMO for 1-chloro-2-naphthol is shown in blue.

This model suggests strongly that there are four possible sites for electrophilic attack (shown with blue tint) with the maximum HOMO availability at the 1-position. Attack at this position is enhanced by the potential hydrogen bonding between the OH functionality at the 2-position and DCCA.

The potential energy surface for the intermolecular interactions between the 1-chloro-2-naphthol and DCCA shows three types of potential energy wells: hydrogen bonding (shown in the article results and discussion), DCCA chlorine atom to  $\pi$ -cloud interactions, and  $\pi$ -stacking interactions. The deepest of these wells involve hydrogen bonding interactions in which the oxygen atom of the naphthol can act as either a hydrogen bond donor or acceptor with the DCCA molecule.

Shallower wells that do not involve hydrogen bonding also exist. Those interactions show weaker intermolecular interaction between the chlorine atom of the DCCA and the  $\pi$  system of the substituted naphthalene ring (shown below).

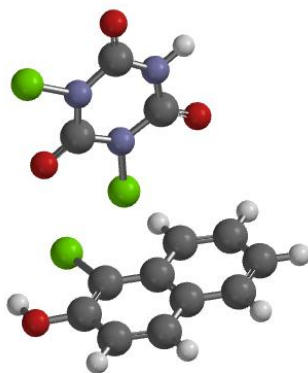

**Figure S3.** DCCA chlorine atom to  $\pi$ -cloud interaction

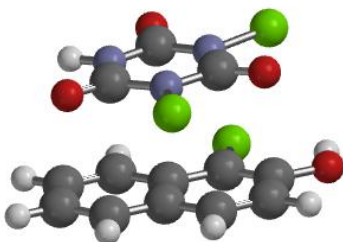

**Figure S4.**  $\pi$ -stacking interaction

In the case of the hydrogen bonding interactions, the attraction draws the DCCA close to the 1-position of the naphthalene. This attraction catalyzes the chlorination at the 1-position relative to either chlorination of the 4-position or chlorination of the unsubstituted ring. As a result, the kinetic product of 1,1-dichloro-2-naphthone is favored over the thermodynamic product of 1,4-dichloro-2-naphthol which is about 54 kJ·mol<sup>-1</sup> more stable.

#### **Determination of reaction mechanism:**

Restricted hybrid HF-DFT SCF calculations were performed using Pulay DIIS + geometric direct minimization and a  $\omega$ B97X-D/6-31G\* model. A polarizable continuum solvation model (C-PCM) was applied using a dielectric of 37.50 simulating acetonitrile. Calculations were conducted using Spartan'24 version 1.0 (by Wavefunction Inc.). TCCA = trichloroisocyanuric acid; DCCA = dichloroisocyanuric acid; MCCA = monochloroisocyanuric acid.

| Species                        | G° (in au)  | H° (in au)  |
|--------------------------------|-------------|-------------|
| 2-Naphthol                     | -460.851009 | -460.809492 |
| TCCA                           | -1884.53404 | -1884.48756 |
| TCCA_2Naphthol_TS_acetonitrile | -2345.34751 | -2345.28436 |
| 1-chloro-2-naphthonium         | -920.836057 | -920.791949 |
| DCCA- ion                      | -1424.55563 | -1424.51138 |
| 1-chloro-2-naphthol            | -920.441096 | -920.396931 |
| DCCA_N-H                       | -1425.00845 | -1424.9639  |
| DCCA_NH__1chloro2Naphthol_TS   | -2345.39388 | -2345.33077 |
| 1-1-dichloro_2naphthonium+     | -1380.40829 | -1380.36157 |
| MCCA-_ion                      | -965.018821 | -964.977318 |
| 1,1-dichloro_2_naphthone       | -1380.00968 | -1379.96315 |
| 1,4-dichloro-2-naphthol        | -1380.03012 | -1379.98323 |
| MCCA                           | -965.479357 | -965.43817  |

**Table S1.** Enthalpic values calculated using a HF-DFT SCF model.

The overall energy profile is shown below and consists of the following steps (1-6).

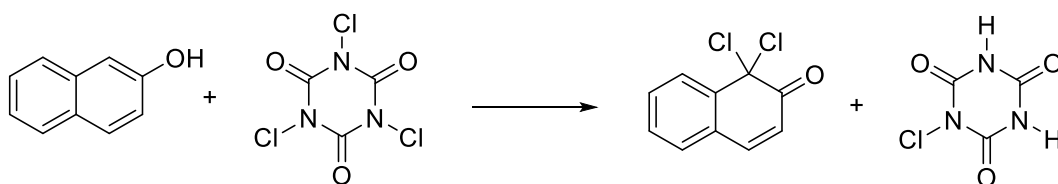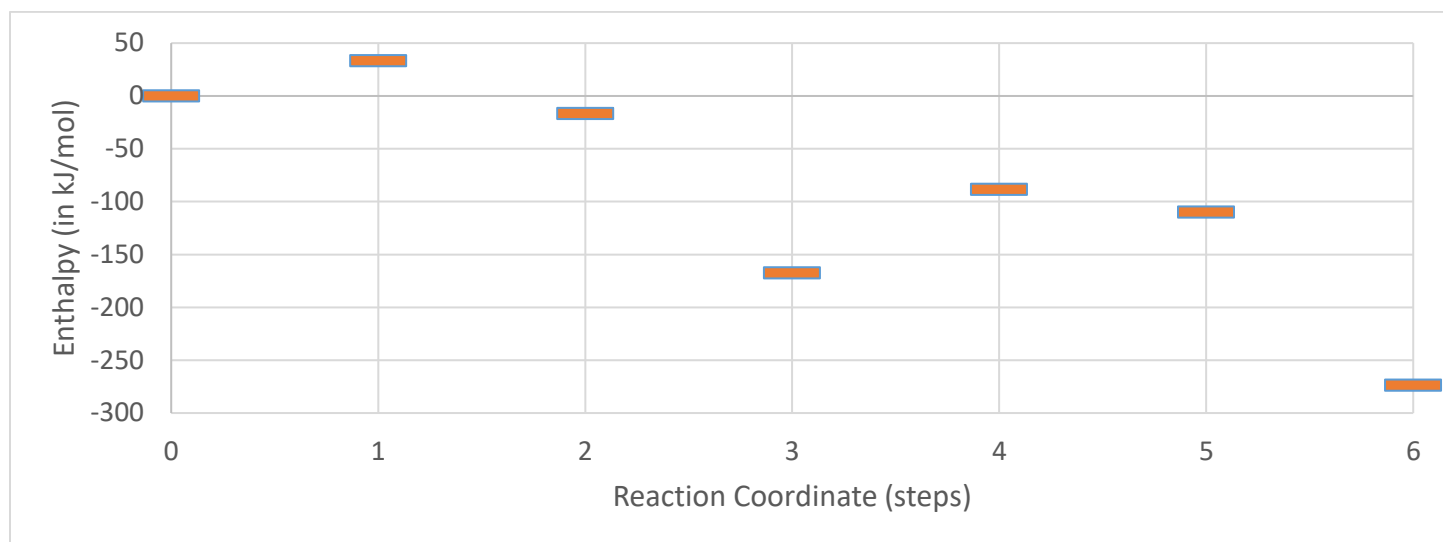

**Figure S5.** Mechanistic energy profile of the conversion of 2-naphthol to 1,1-dichloronaphthalen-2-one.

The enthalpy profile was produced along the reaction coordinate defined by the following steps:

**Step 1:** Formation of the chlorination transition state

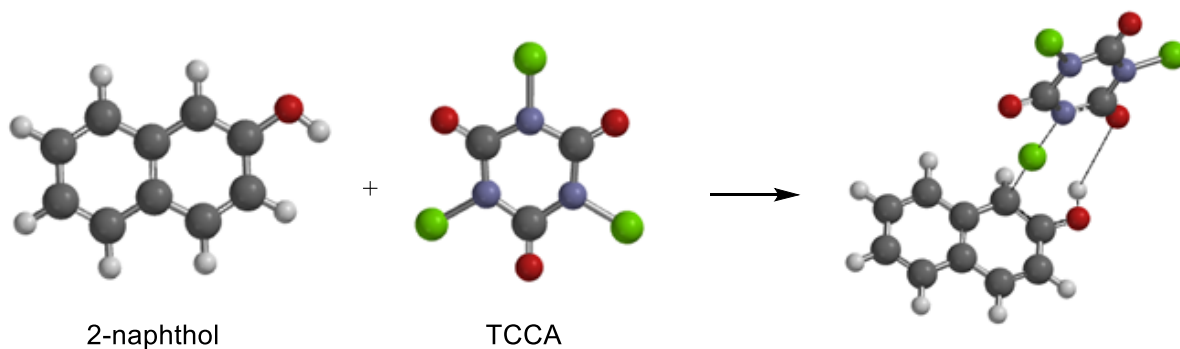

**Step 2:** Formation of the 1-chloro-2-naphthonium ion

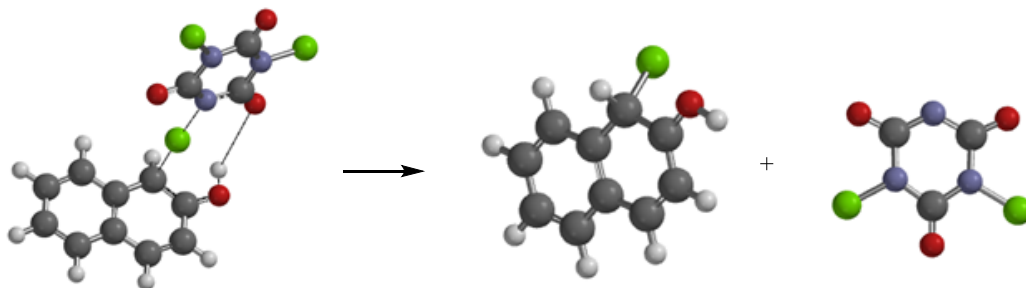

**Step 3:** Deprotonation of C-1 of the 1-chloro-2-naphthonium ion to produce the 1-chloro-2-naphthol

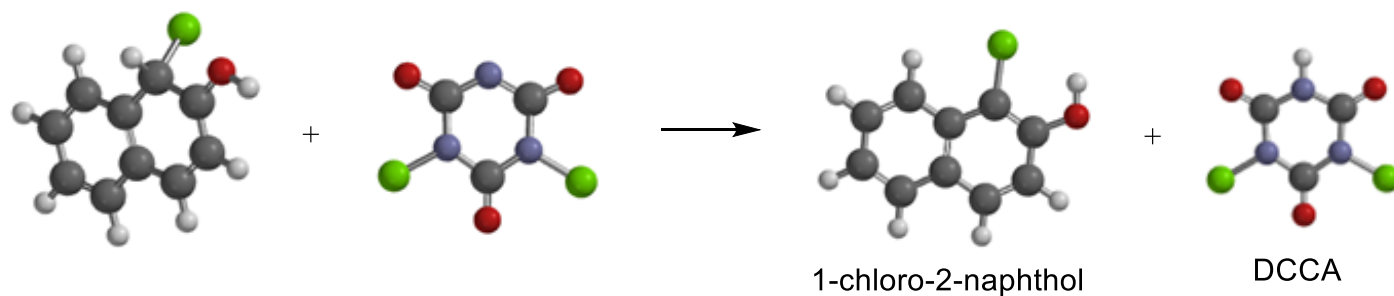

**Step 4:** Formation of the transition state during the chlorination of 1-chloro-2-naphthol

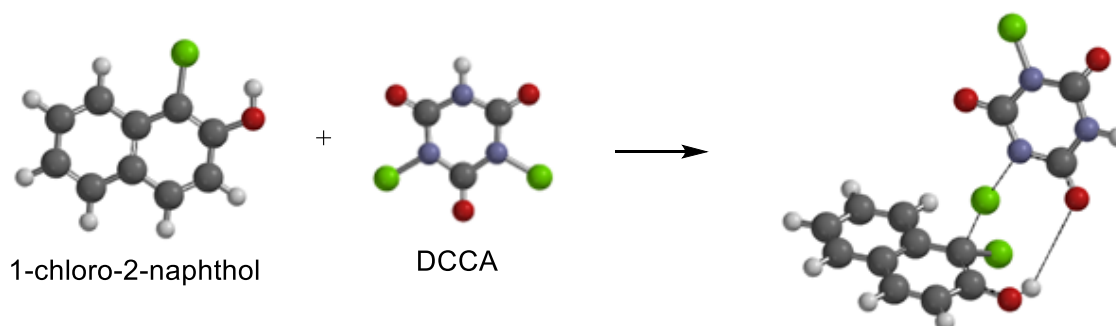

**Step 5:** Formation of the 1,1-dichloro-2-naphthonium cation

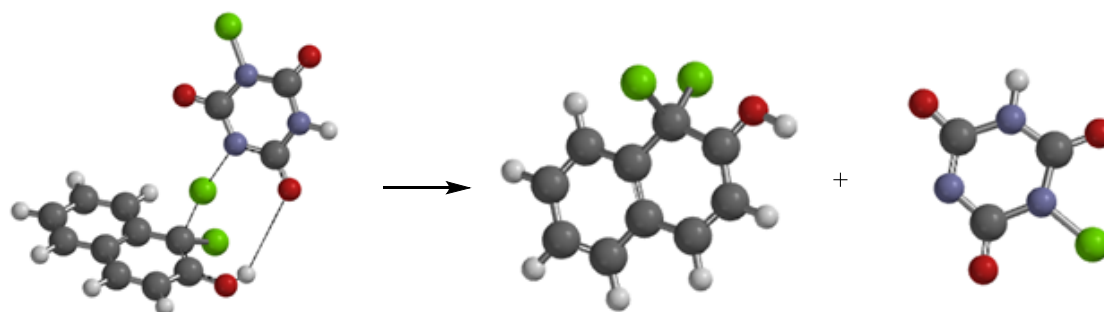

**Step 6:** Deprotonation of the 1,1-dichloro-2-naphthonium ion to produce the 1,1-dichloronaphthalen-2-one

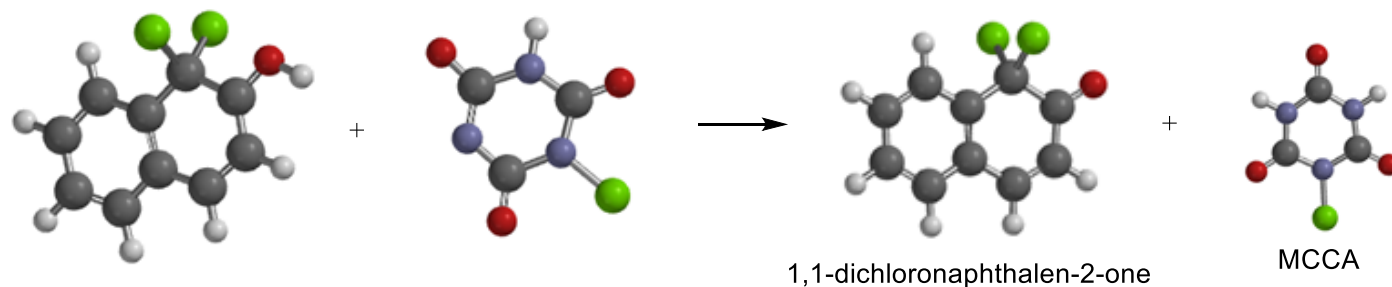

**Figure S6.** Ball and stick models of mechanistic steps 1-6.

The transition states in Step 1 and Step 4 yield a single imaginary corresponding to the chlorine atom transfer at  $352\text{ cm}^{-1}$  and  $311\text{ cm}^{-1}$  respectively. The transition state searches allowed for a concerted mechanism in which the chlorine atom and the proton on the oxygen atom could be transferred; however, the modeling suggested that these two processes occur consecutively.

The activation enthalpy of Step 1 is  $+33\text{ kJ}\cdot\text{mol}^{-1}$  and that of Step 4 is  $+79\text{ kJ}\cdot\text{mol}^{-1}$ , suggesting that the second chlorination step is rate determining. The overall process is highly exergonic, downhill by about  $270\text{ kJ}\cdot\text{mol}^{-1}$ .

The relative stability of the N-H DCCA and the O-H DCCA was also modeled employing an HF-DFT SCF calculation ( $\omega$ B97X-D/6-31G\*/C-PCM: acetonitrile).

| Species  | $G^\circ$ (in au) |
|----------|-------------------|
| DCCA_N-H | -1425.00845       |
| DCCA_O-H | -1424.97717       |

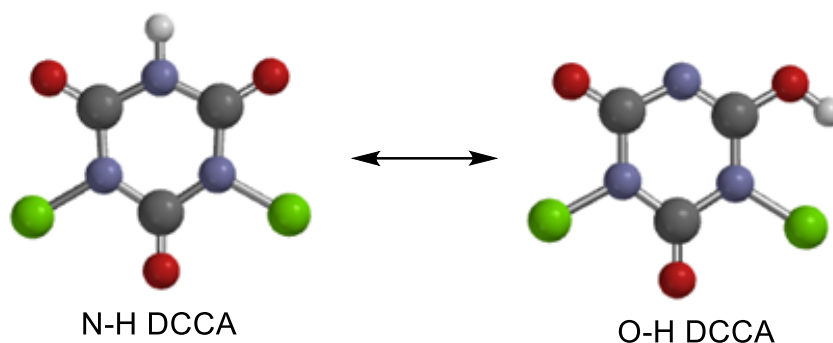

**Figure S7.** Depictions of the N-H DCCA and O-H DCCA molecules.

From the implicit acetonitrile solvation model, the free energy of N-H DCCA molecule is about  $82\text{ kJ}\cdot\text{mol}^{-1}$  *lower* than that of the O-H DCCA molecule. Thus N-H DCCA is used in the mechanistic model above.

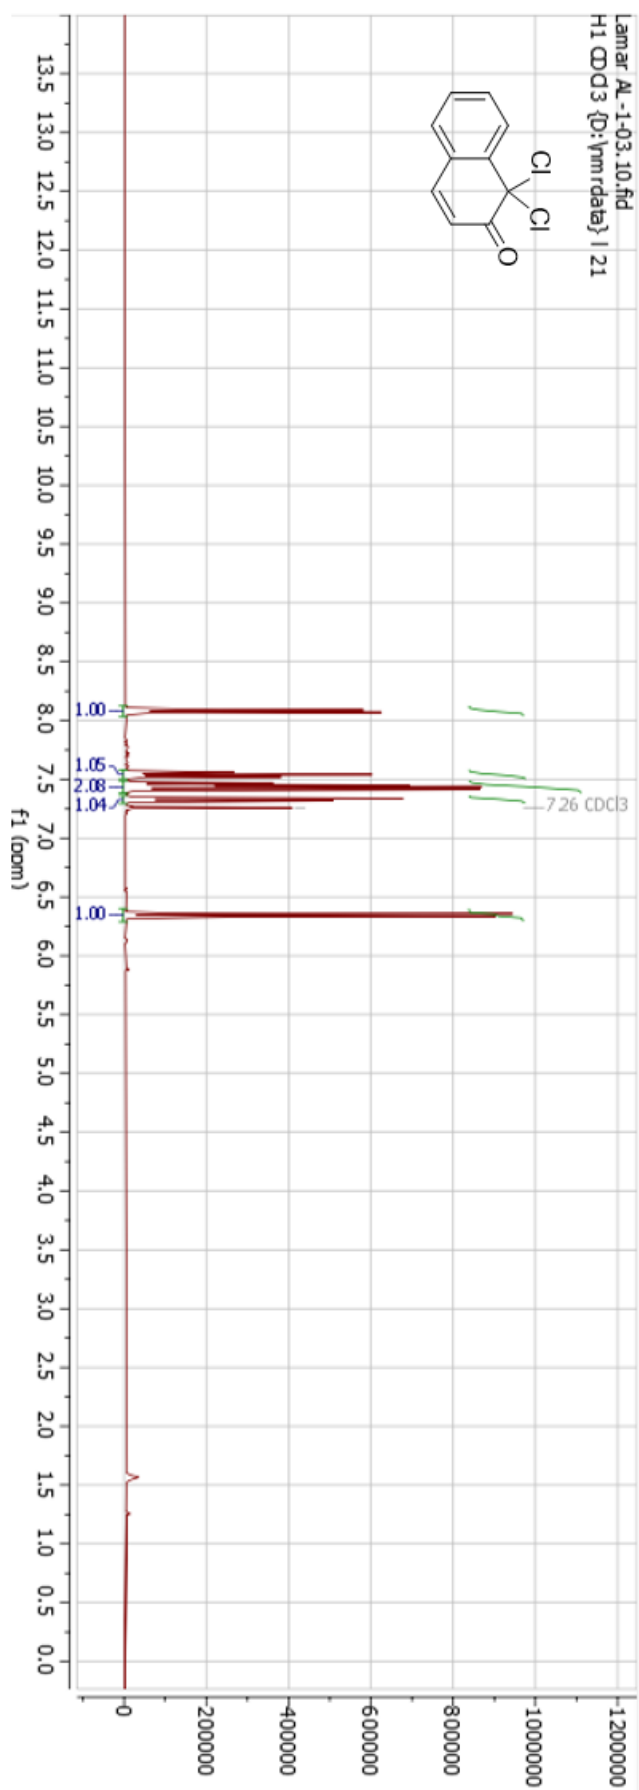

Figure S8.  $^1\text{H}$  NMR of Product 2.

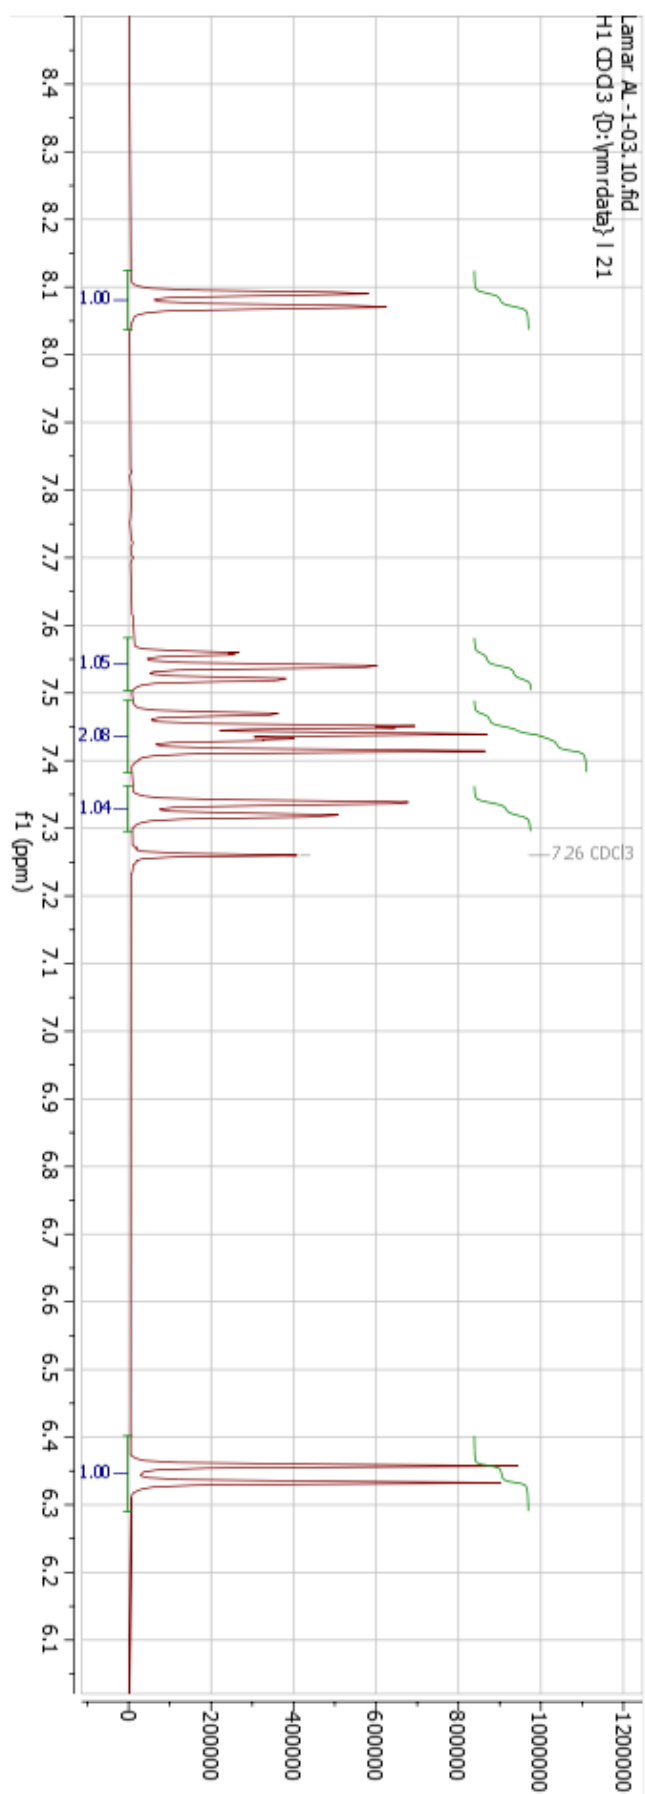

**Figure S9.** Zoomed in aromatic region  $^1\text{H}$  NMR of Product **2**.



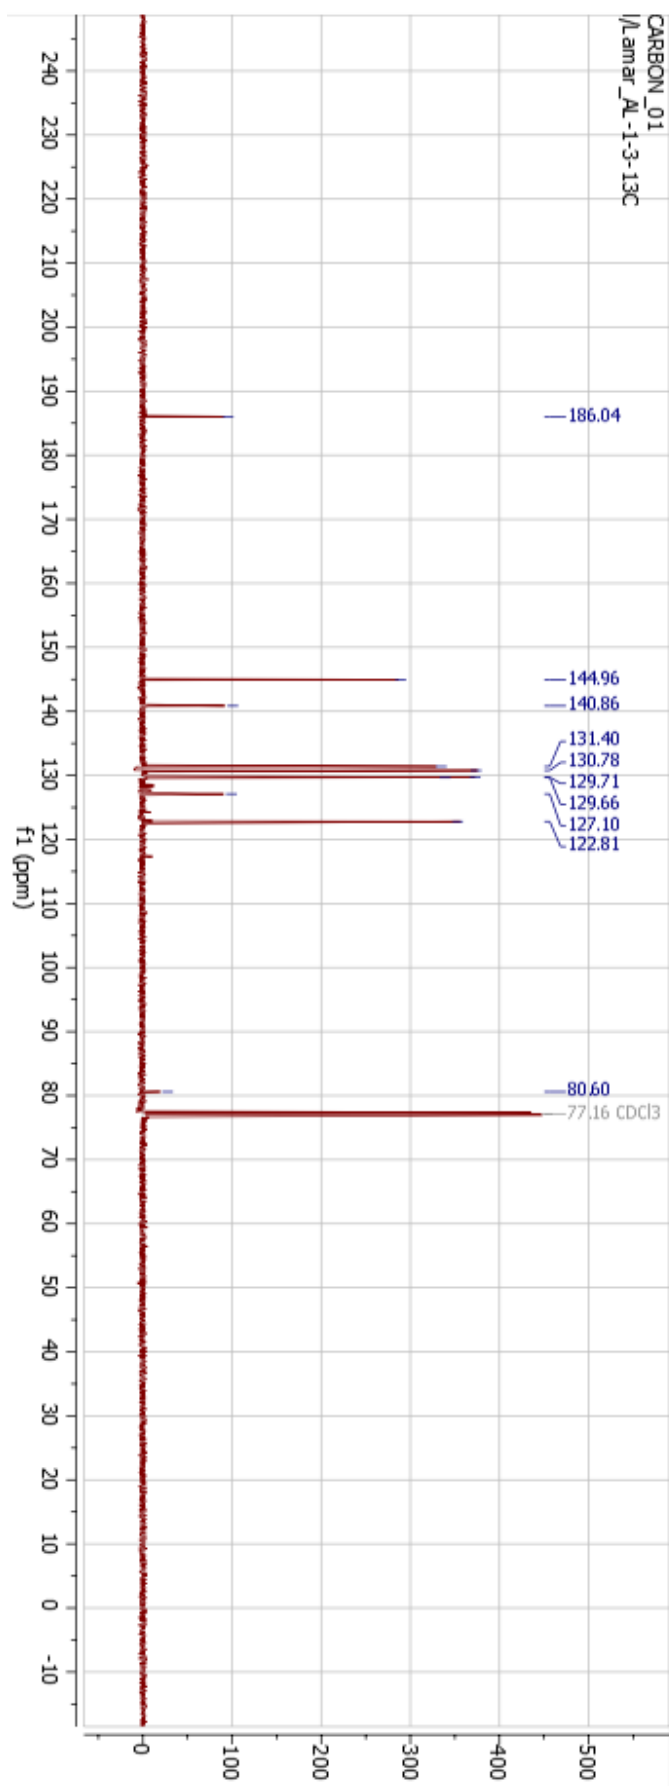

Figure S10.  $^{13}\text{C}$  NMR of Product 2.

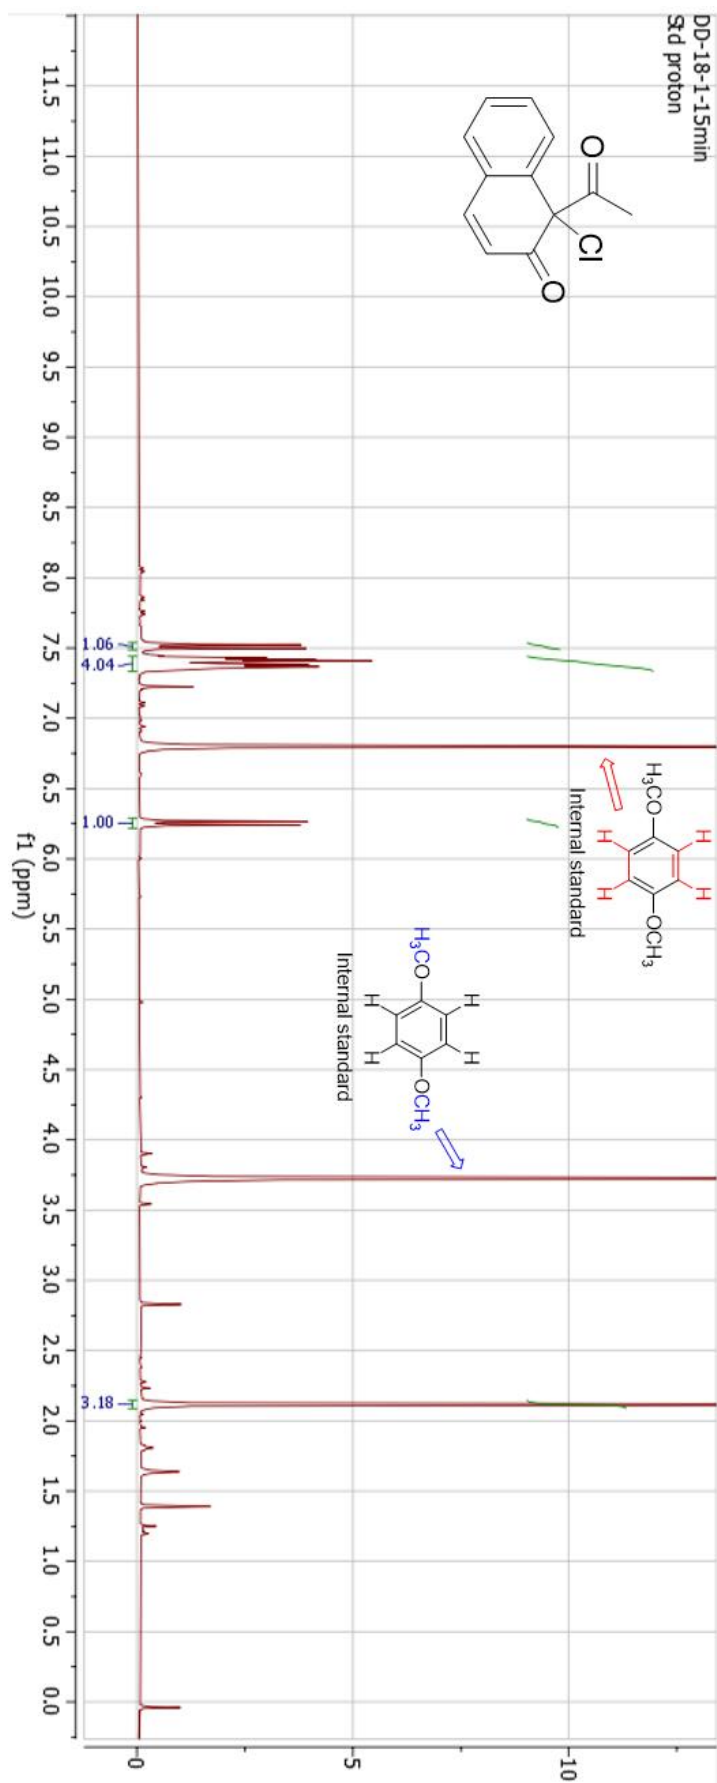

**Figure S11.**  $^1\text{H}$  of Product **3** with 1,4-dimethoxybenzene added as internal standard.

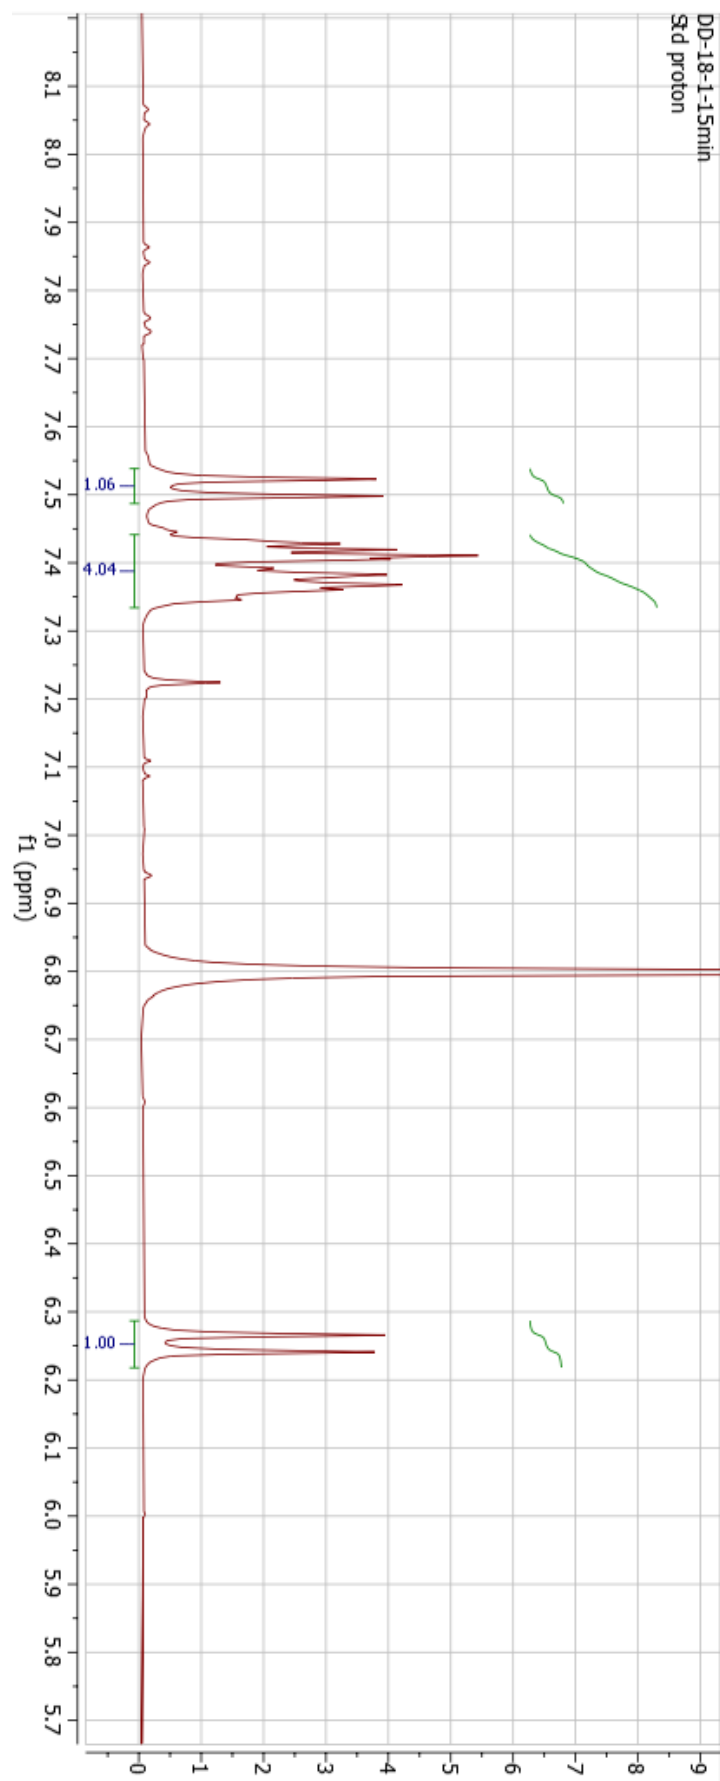

**Figure S12.** Zoomed in aromatic region of  $^1\text{H}$  of Product 3 with 1,4-dimethoxybenzene added as internal standard.

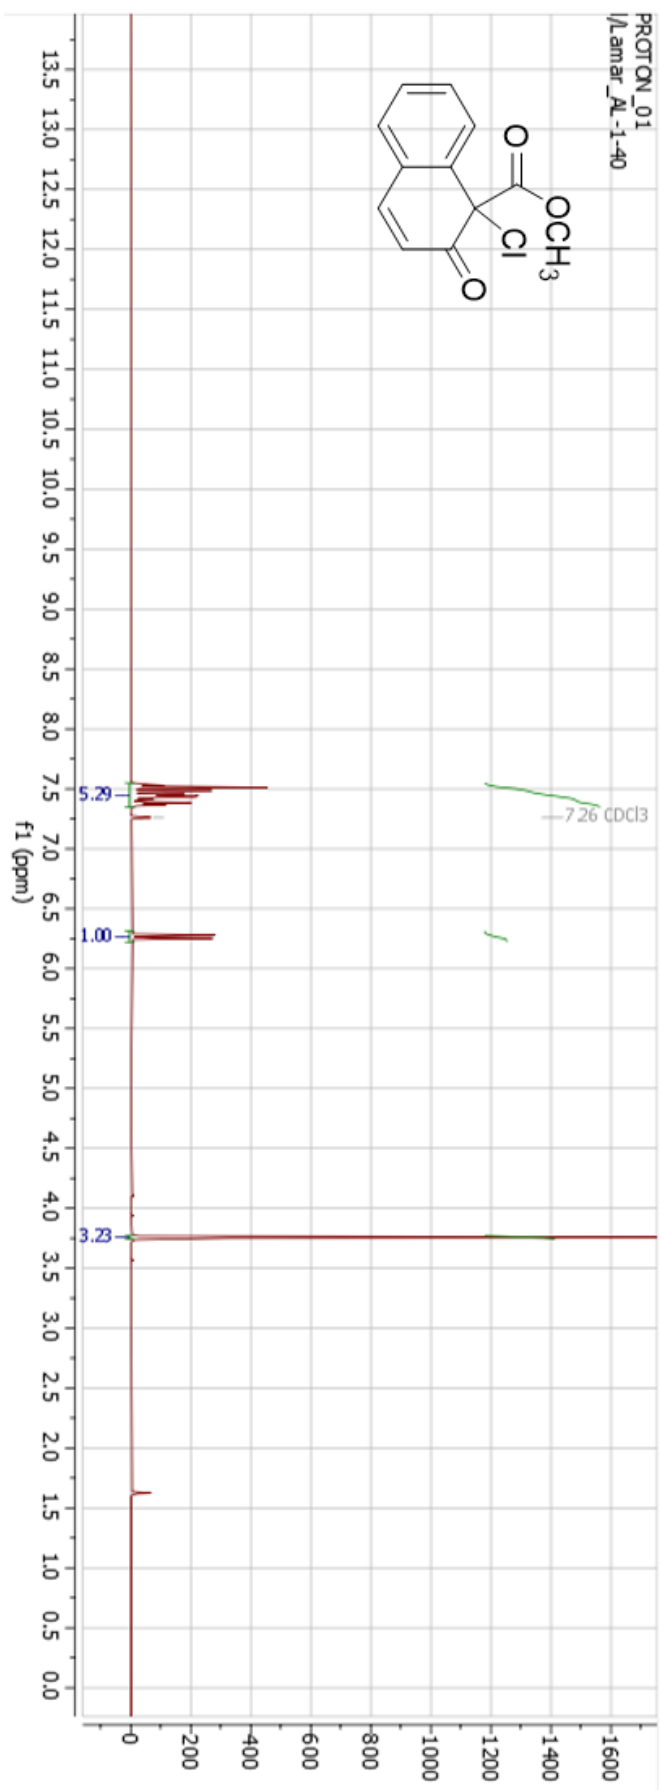

Figure S13. <sup>1</sup>H of Product 4.

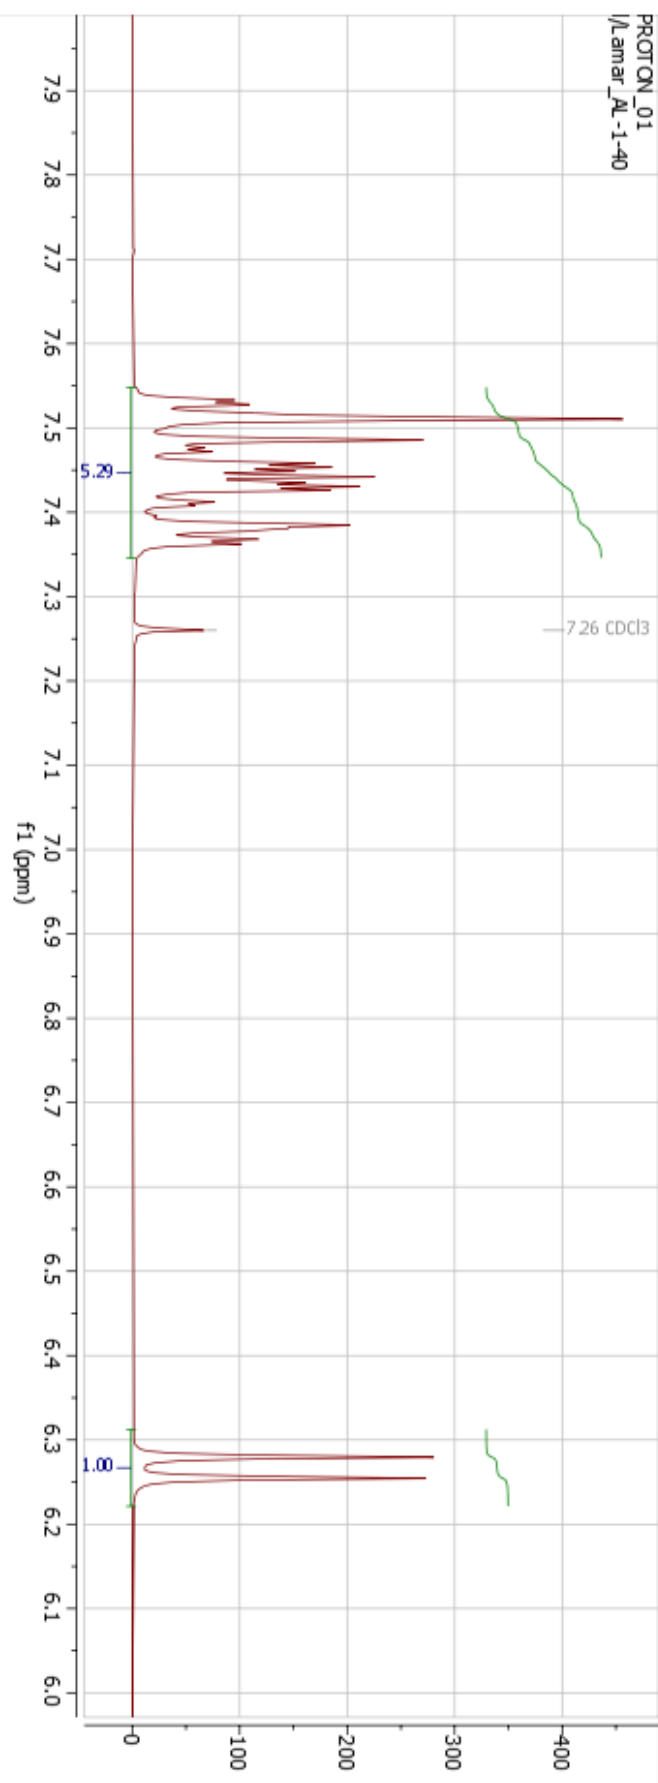

**Figure S14.** Zoomed in aromatic region of  $^1\text{H}$  NMR of Product 4.

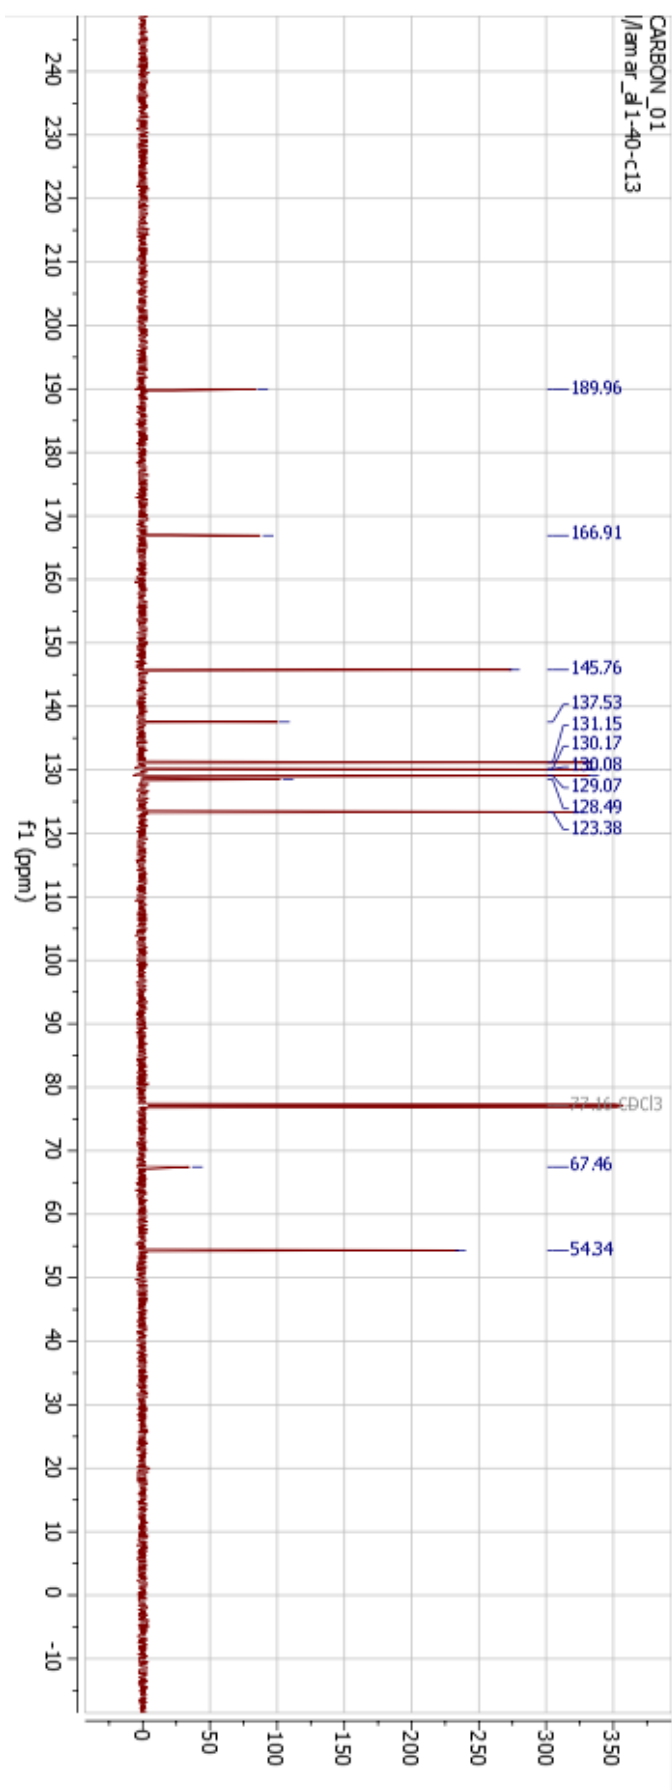

Figure S15.  $^{13}\text{C}$  NMR of Product 4.

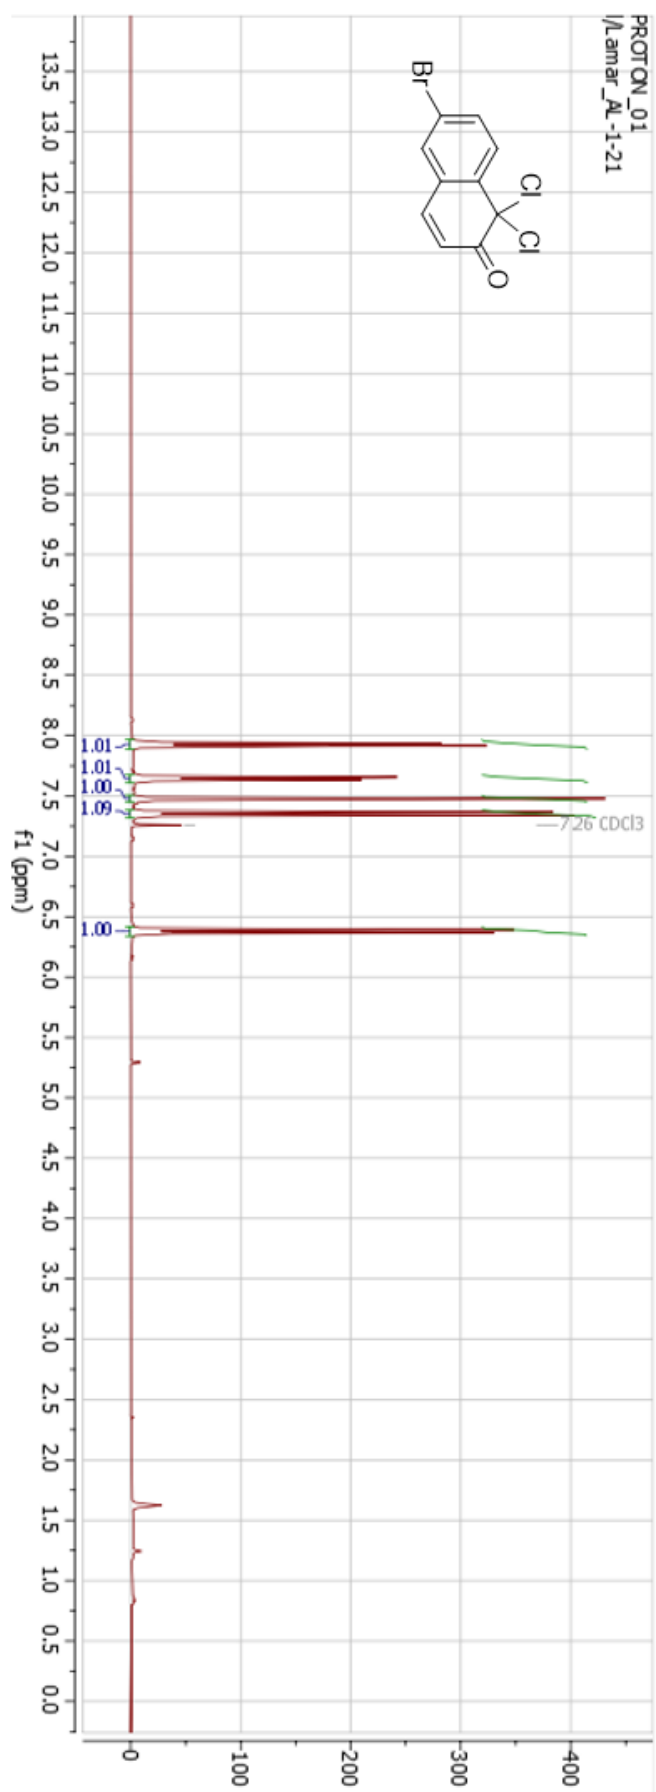

Figure S16. <sup>1</sup>H of Product 5.

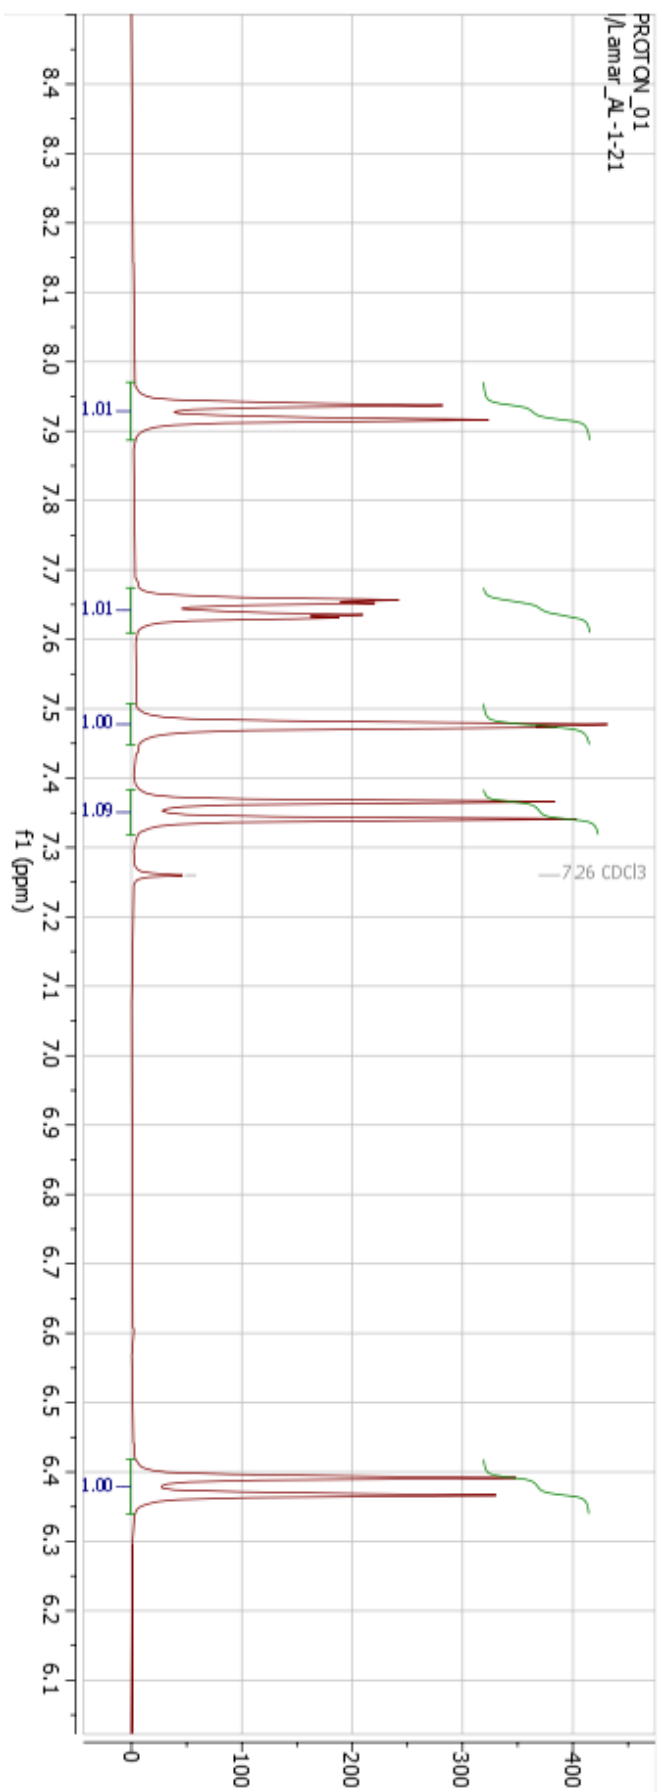

**Figure S17.** Zoomed in aromatic region of  $^1\text{H}$  NMR of Product **5**.



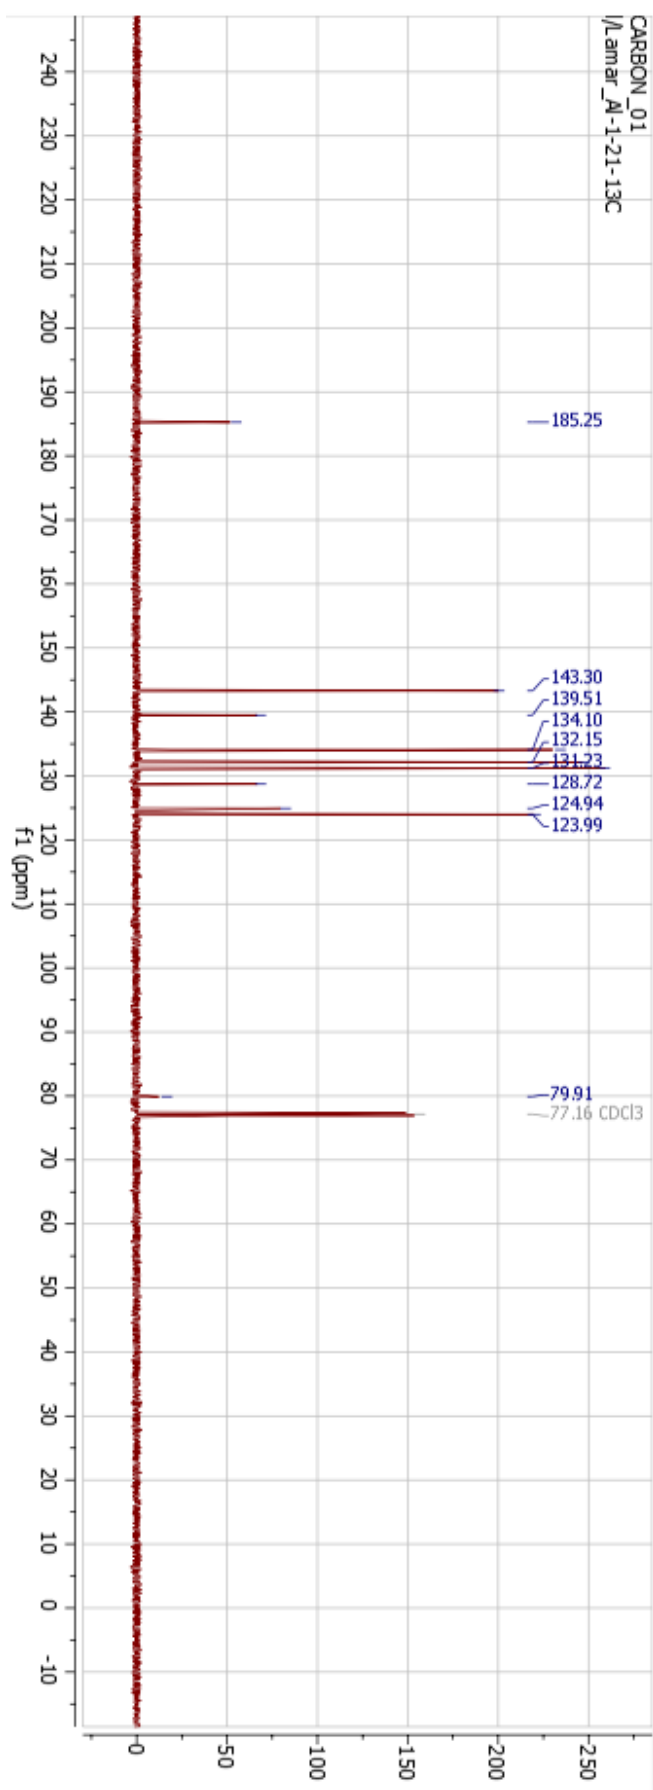

Figure S18.  $^{13}\text{C}$  NMR of Product 5.

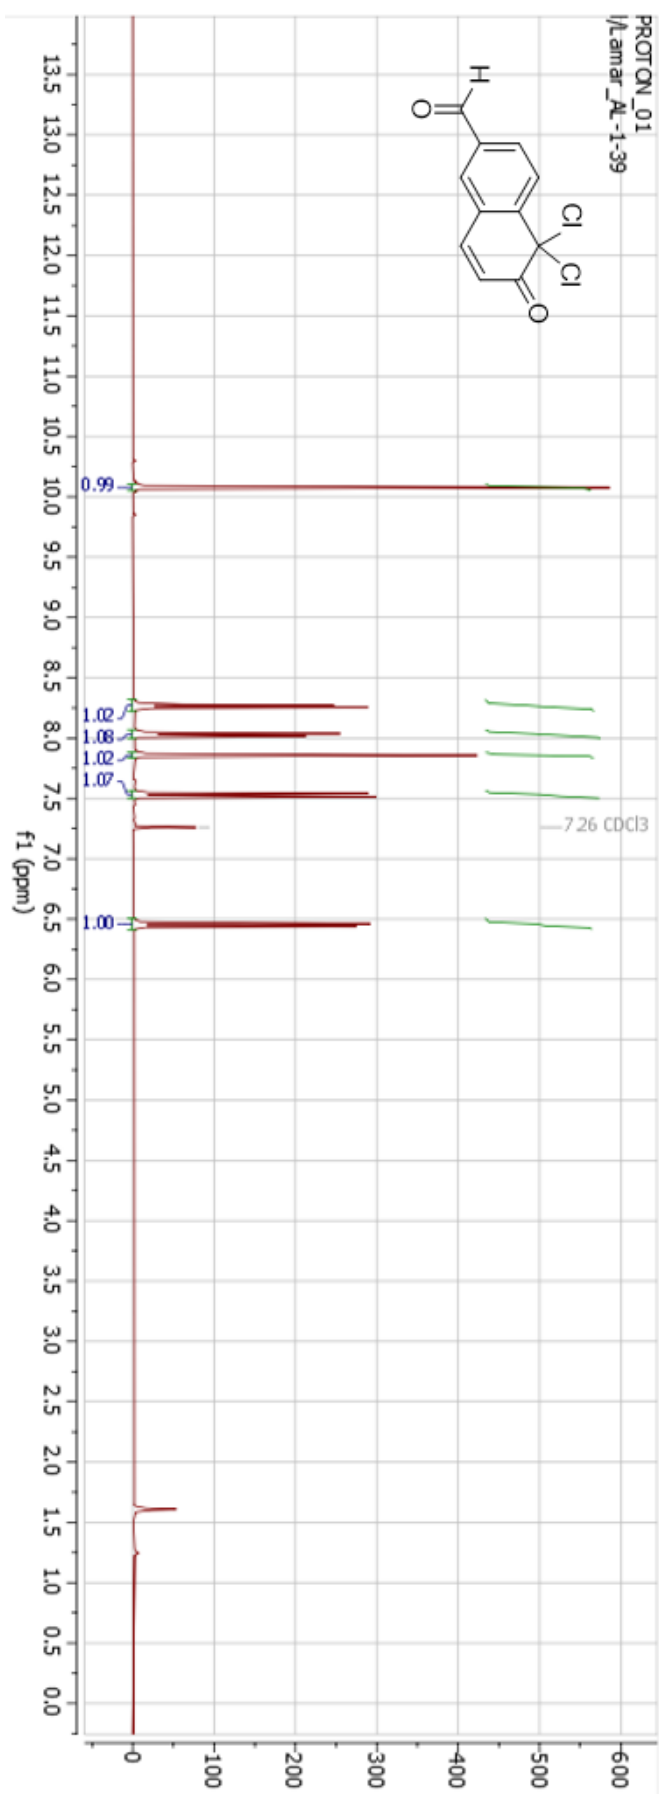

Figure S19.  $^1\text{H}$  of Product 6.

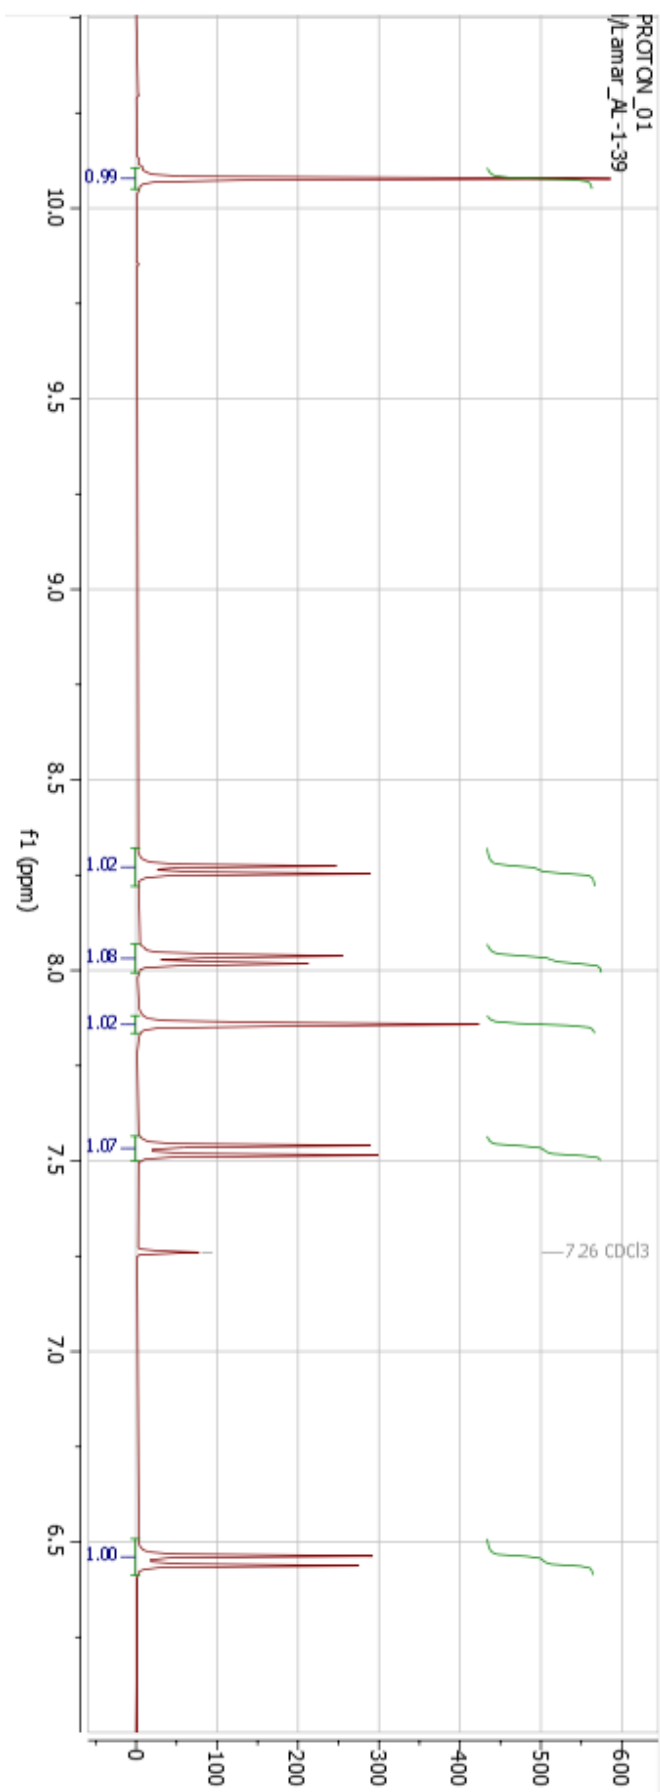

**Figure S20.** Zoomed in aromatic region of  $^1\text{H}$  NMR of Product 6.

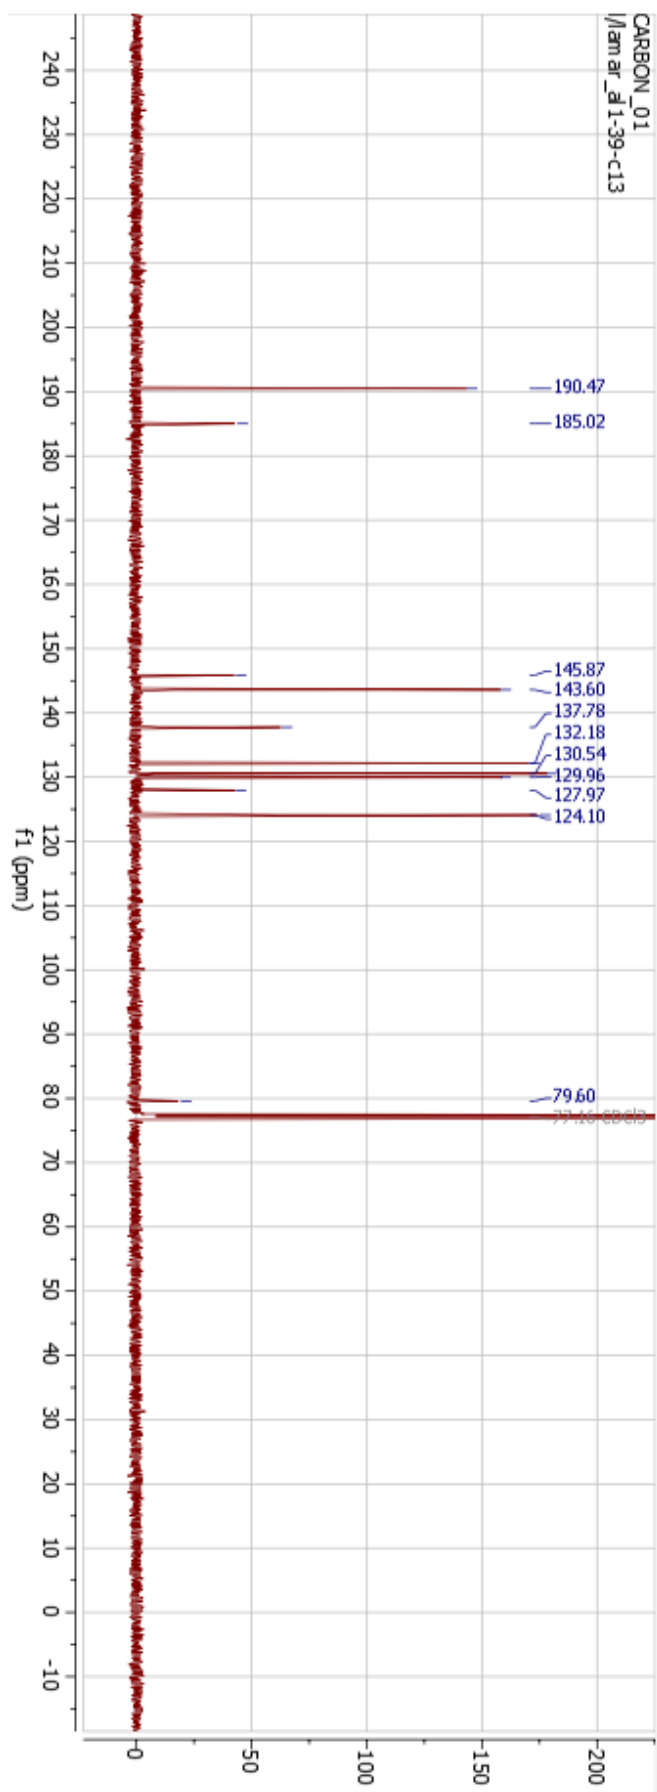

Figure S21.  $^{13}\text{C}$  NMR of Product 6.

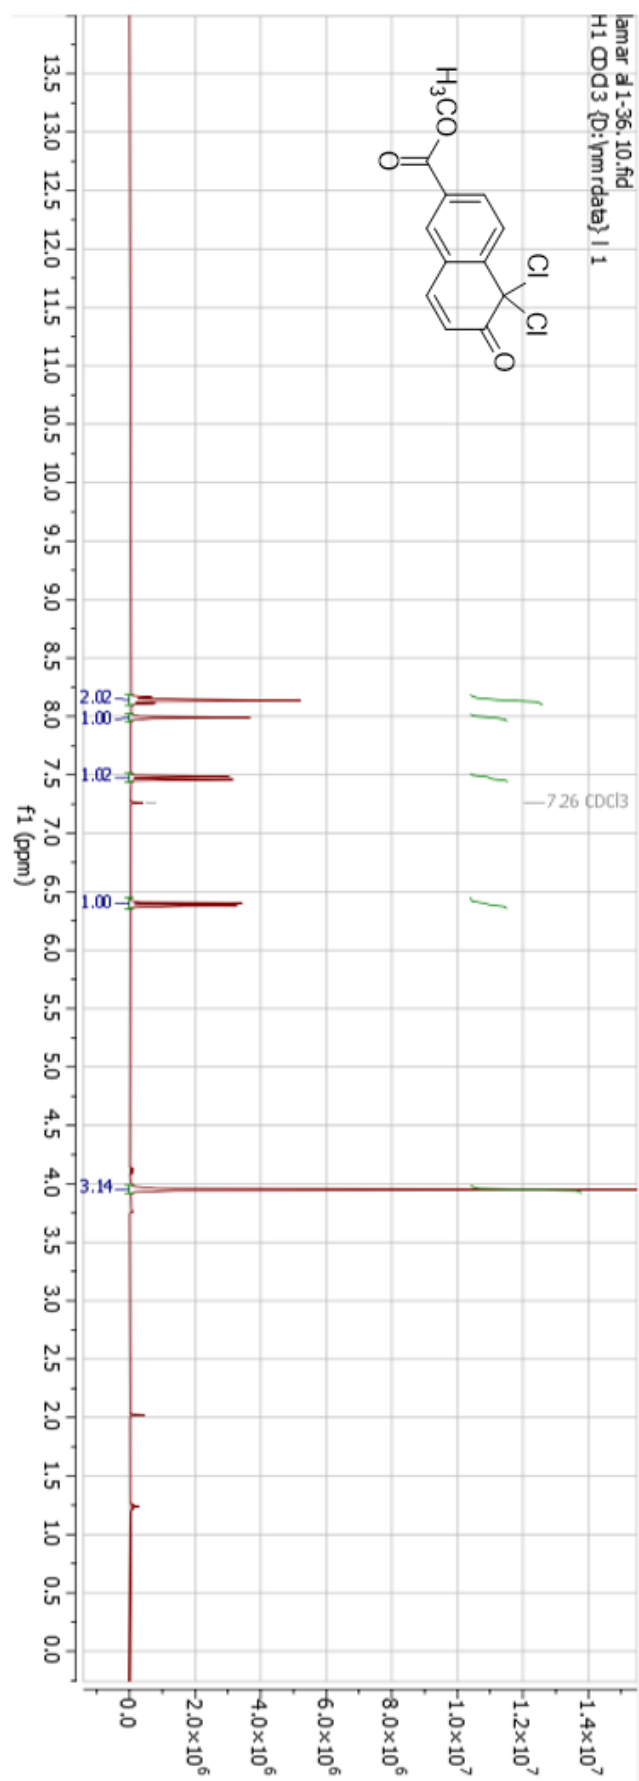

Figure S22. <sup>1</sup>H NMR of Product 7.

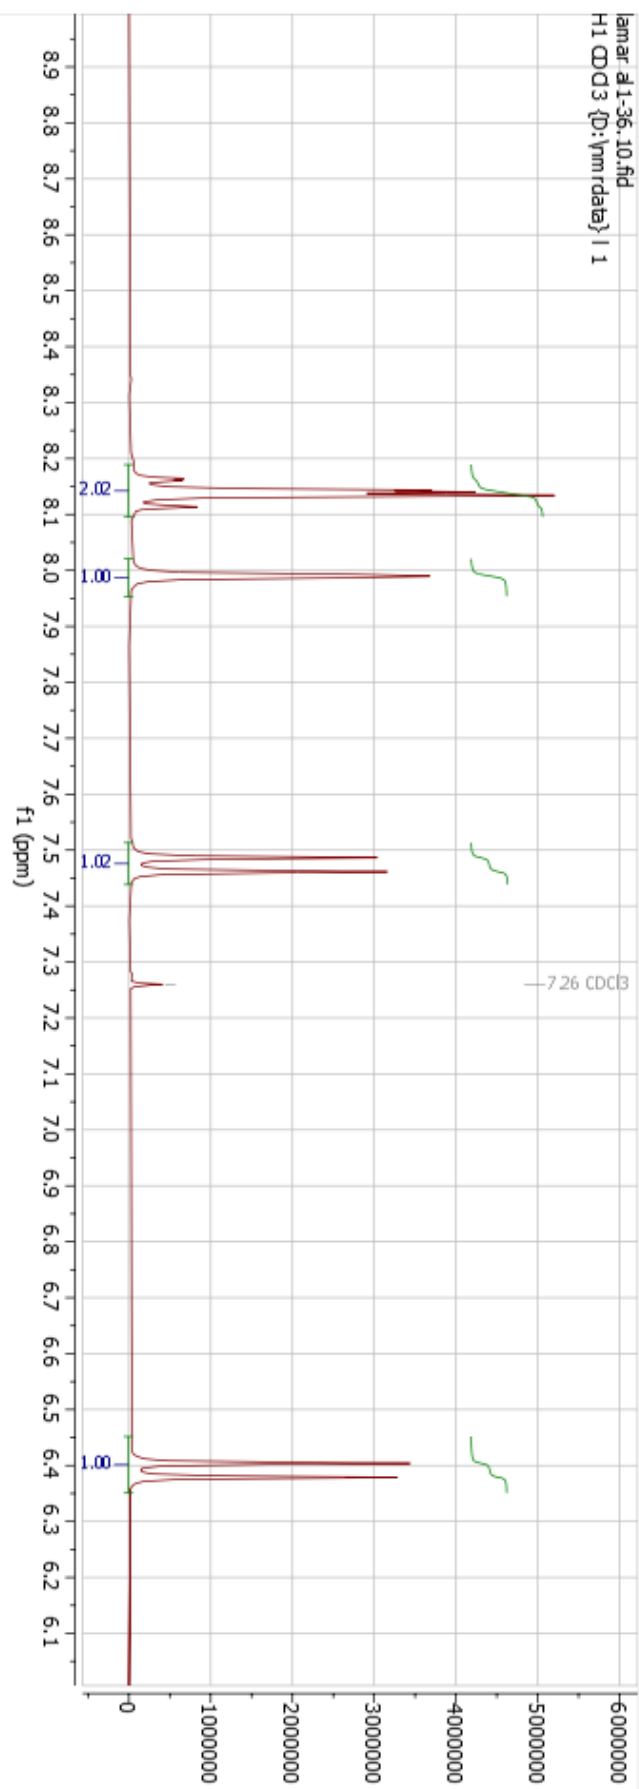

**Figure S23.** Zoomed in aromatic region of  $^1\text{H}$  NMR of Product 7.

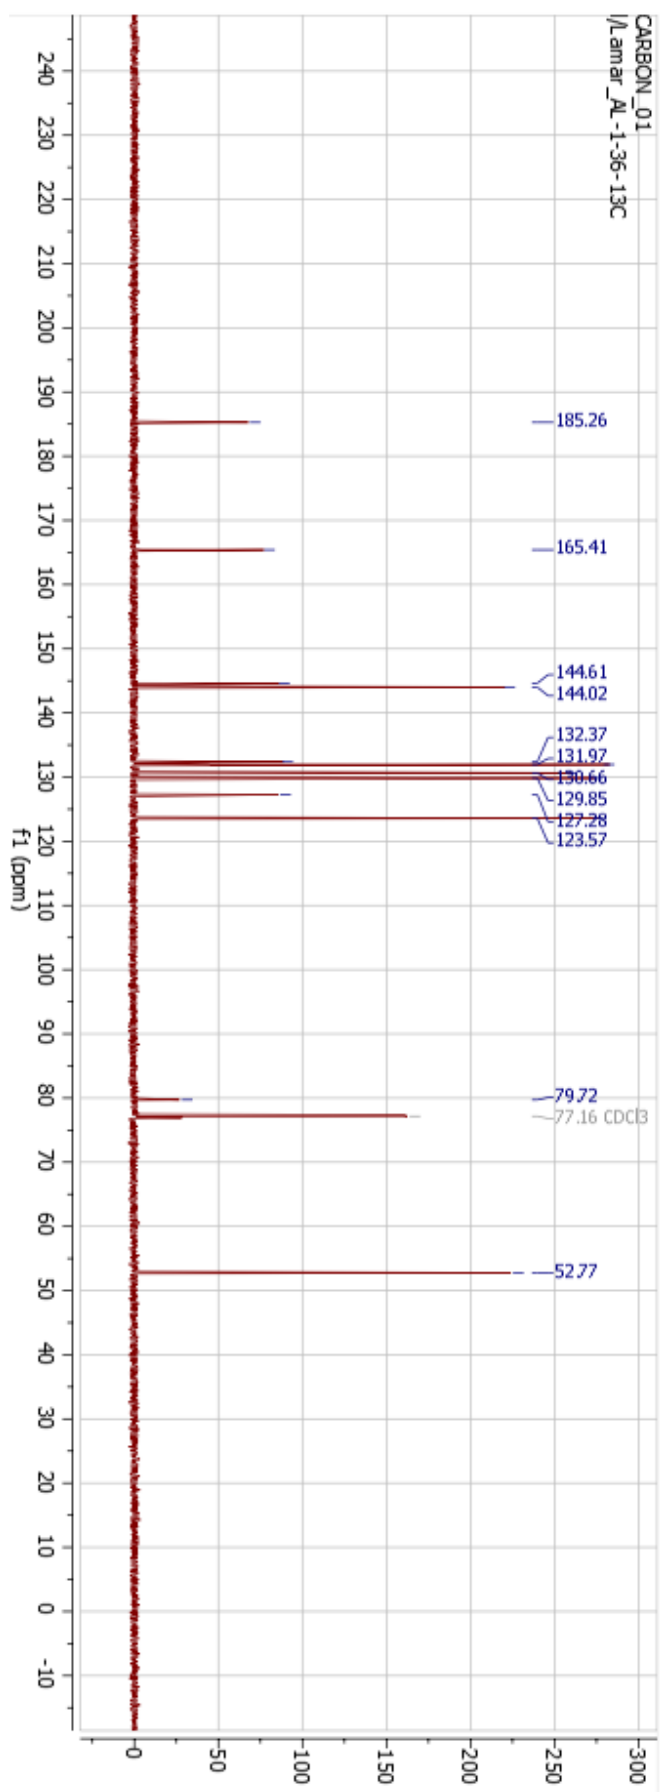

Figure S24.  $^{13}\text{C}$  NMR of Product 7.

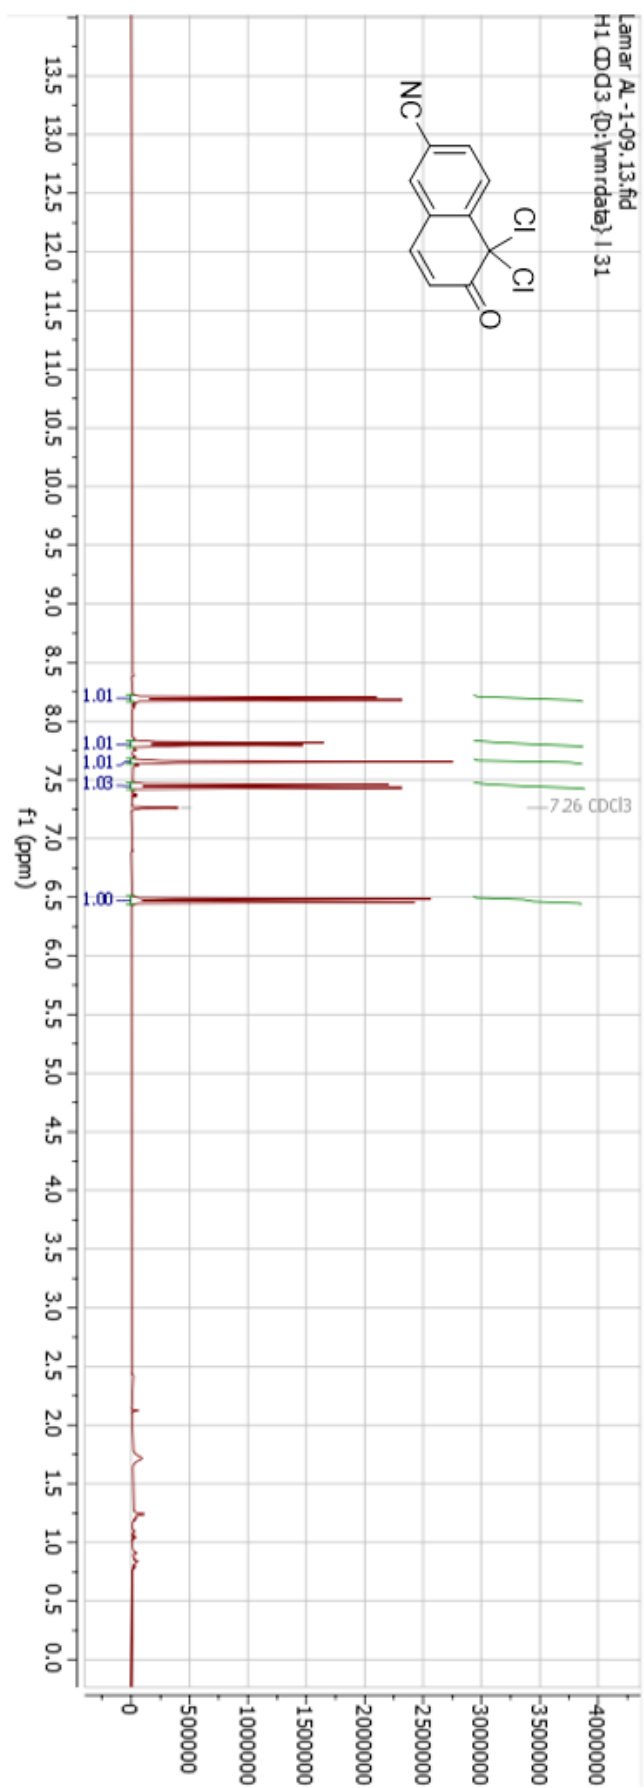

Figure S25. <sup>1</sup>H NMR of Product 8.



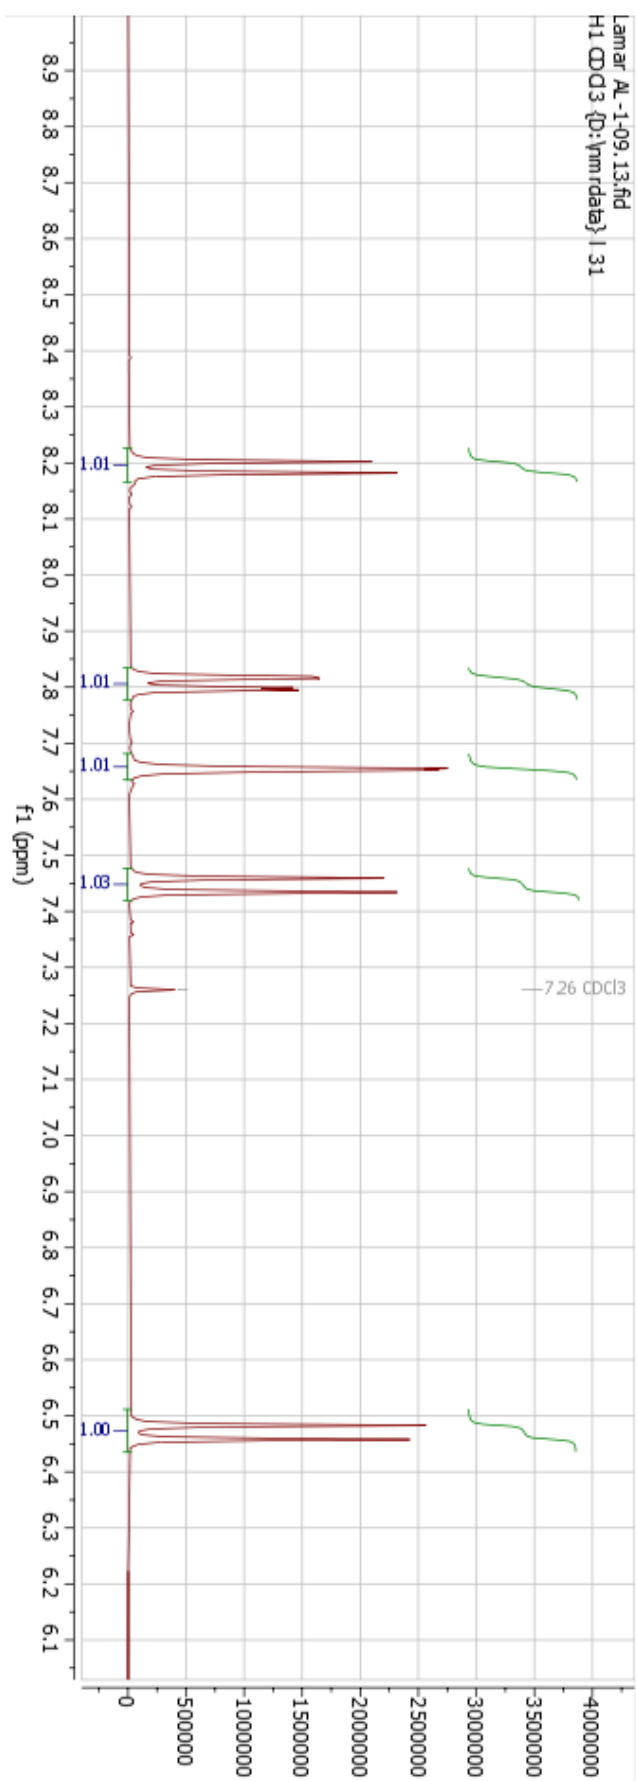

**Figure S26.** Zoomed in aromatic region of  $^1\text{H}$  NMR of Product **8**.

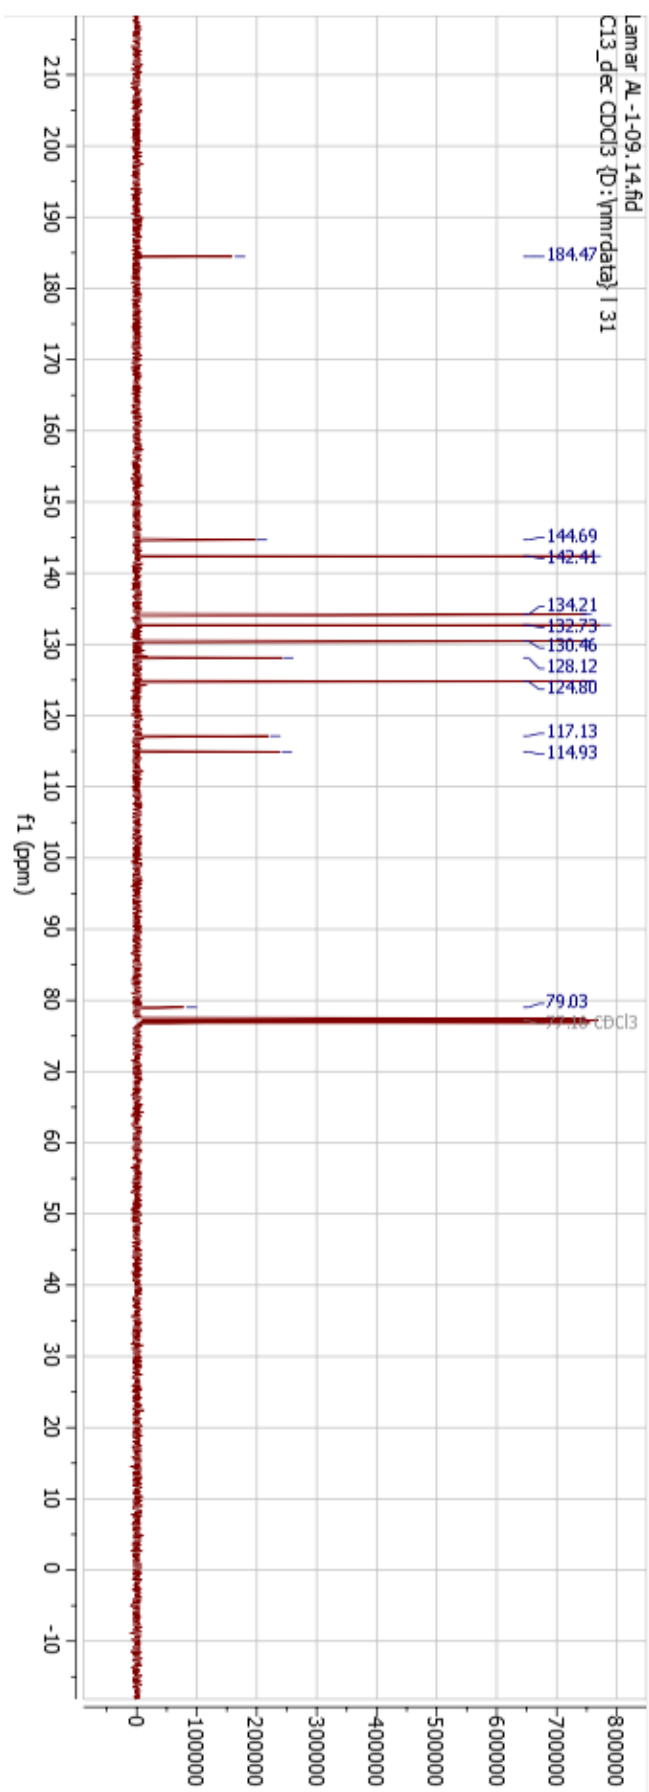

Figure S27.  $^{13}\text{C}$  NMR of Product 8.

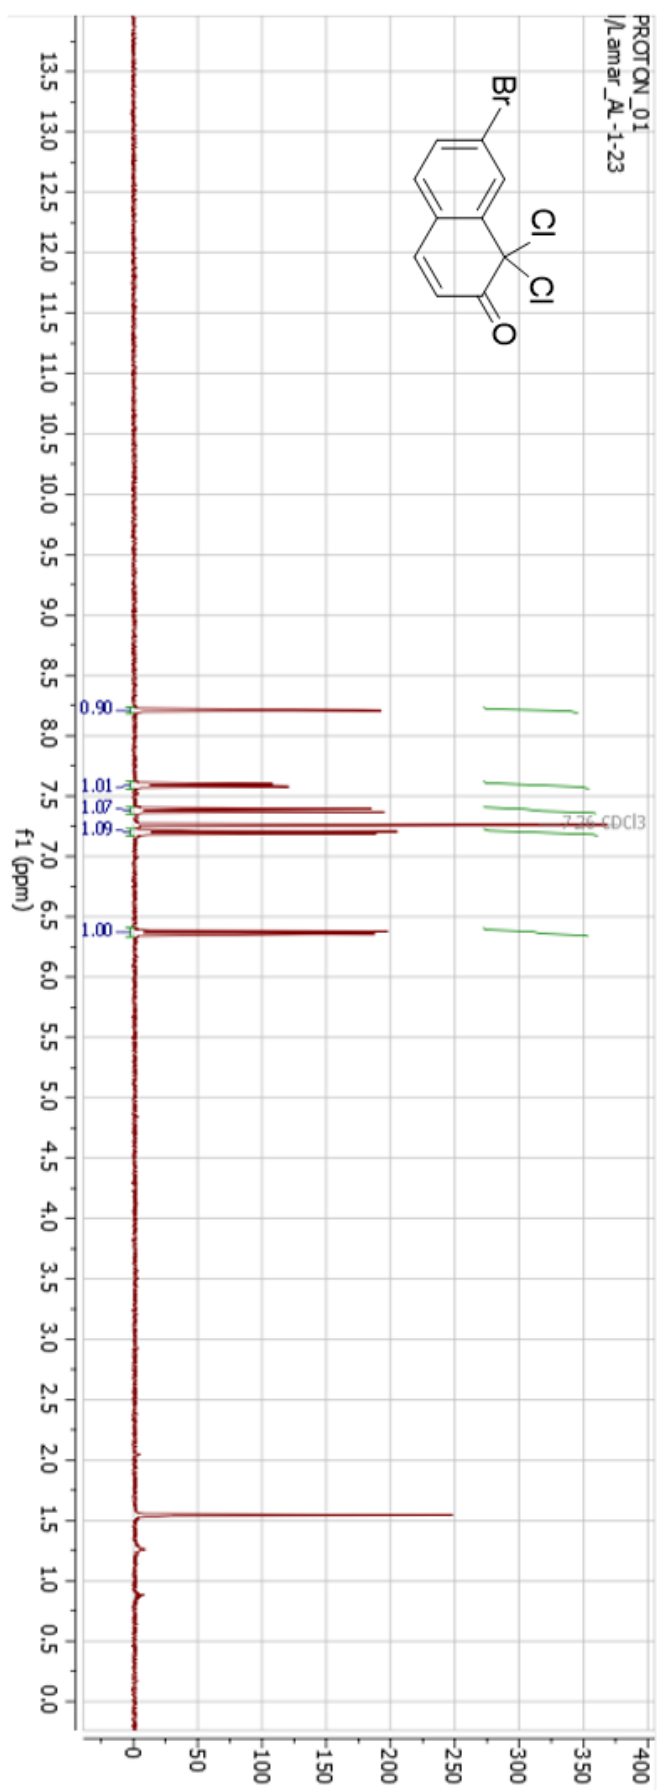

Figure S28. <sup>1</sup>H NMR of Product 9.

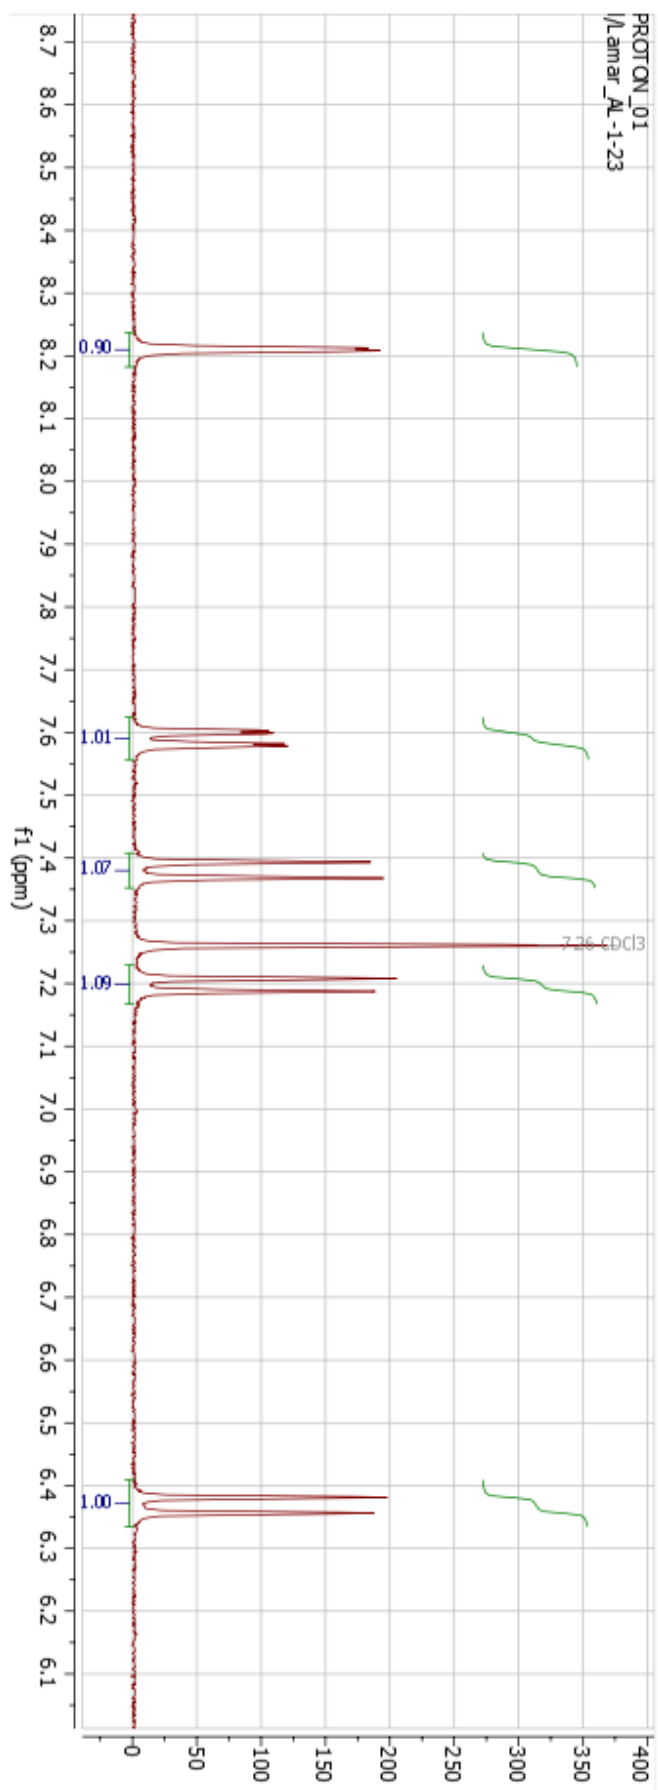

**Figure S29.** Zoomed in aromatic region of  $^1\text{H}$  NMR of Product **9**.

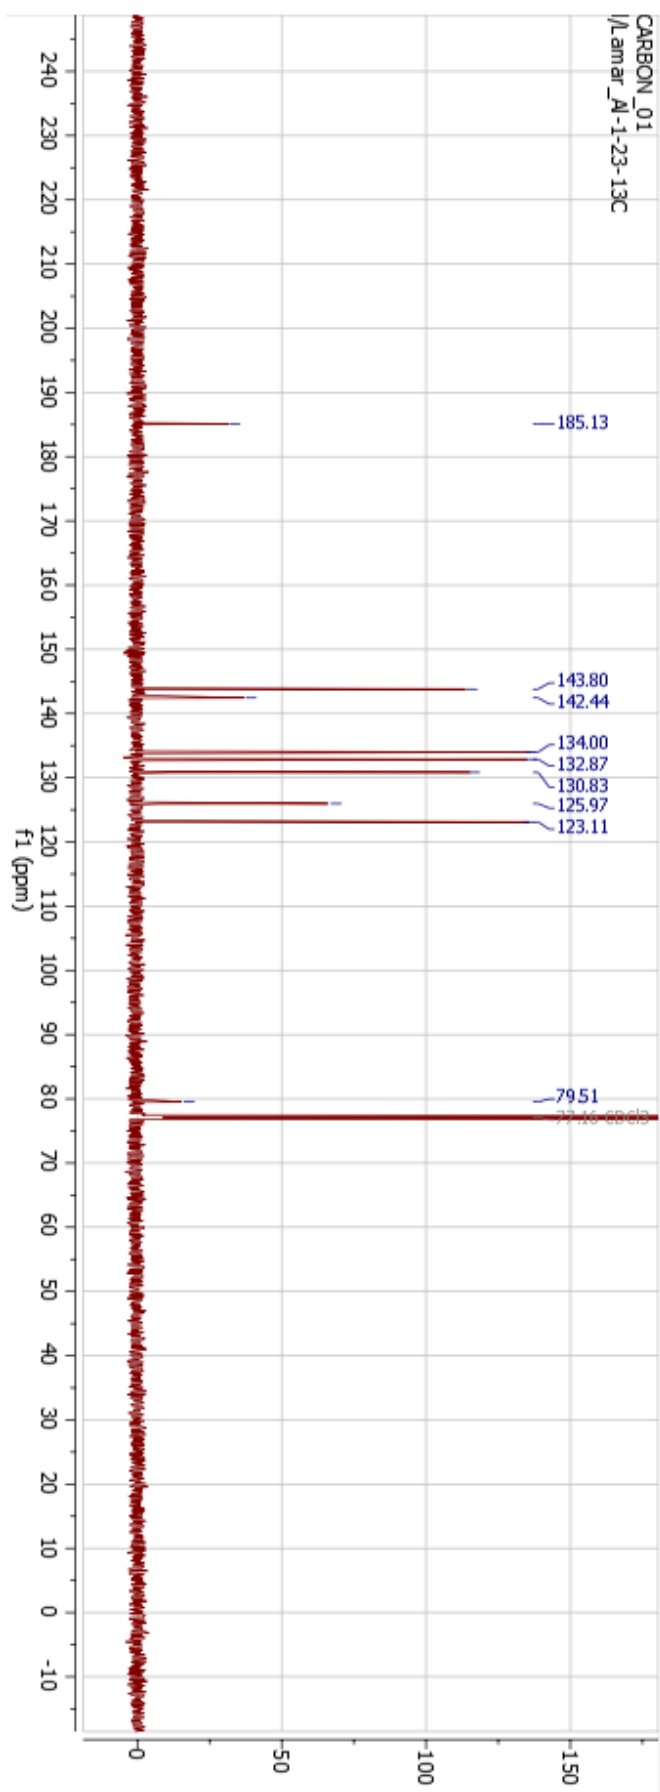

Figure S30.  $^{13}\text{C}$  NMR of Product 9.

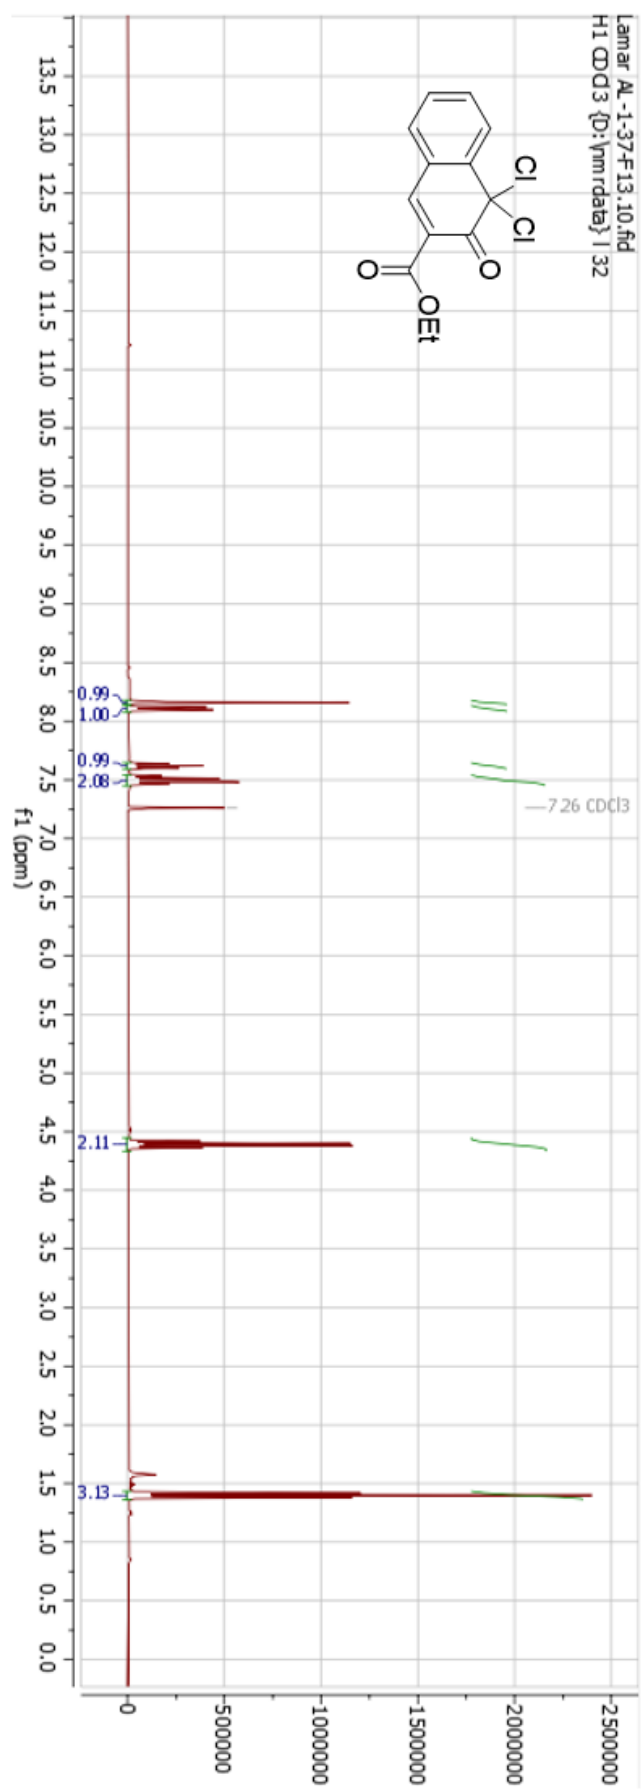

Figure S31.  $^1\text{H}$  NMR of Product 10.

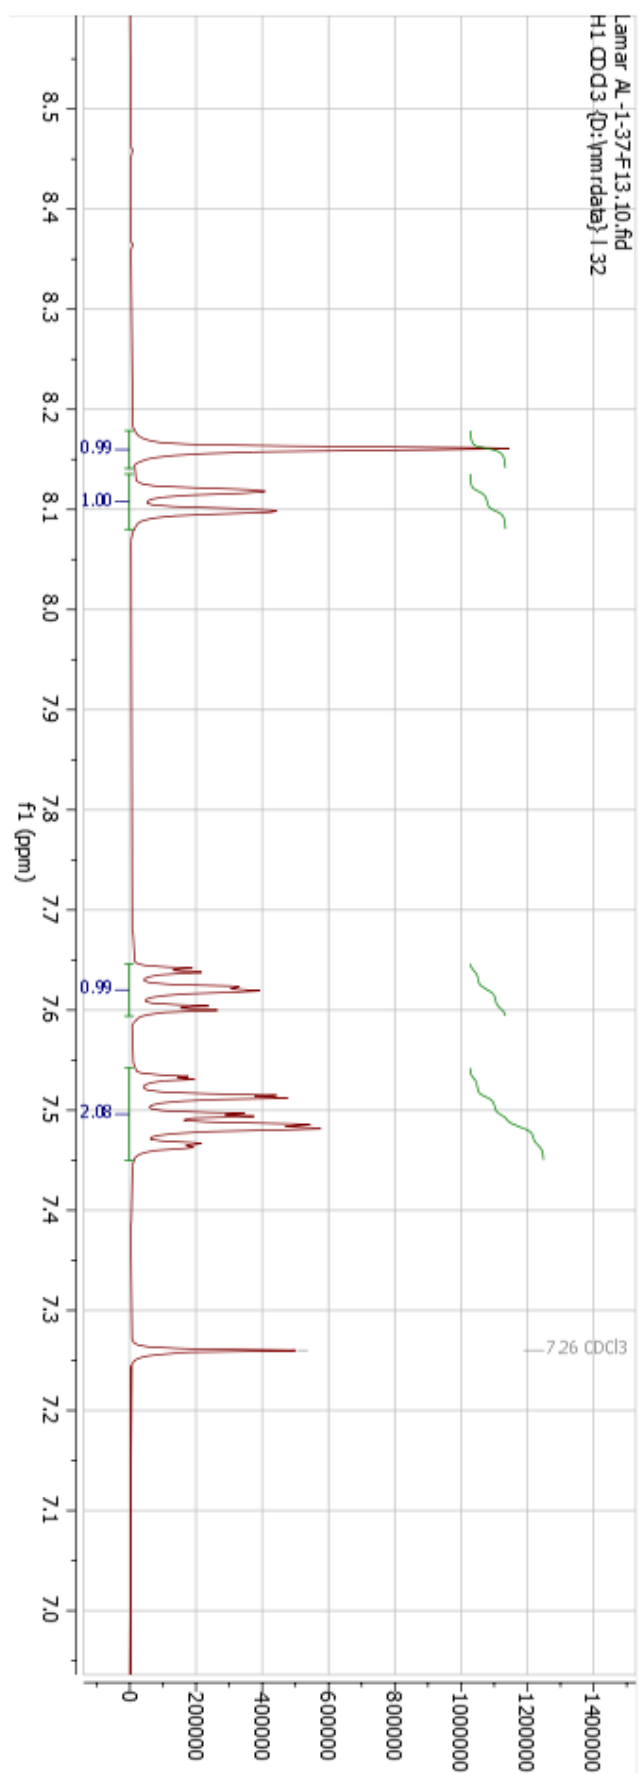

**Figure S32.** Zoomed in aromatic region of  $^1\text{H}$  NMR of Product 10.

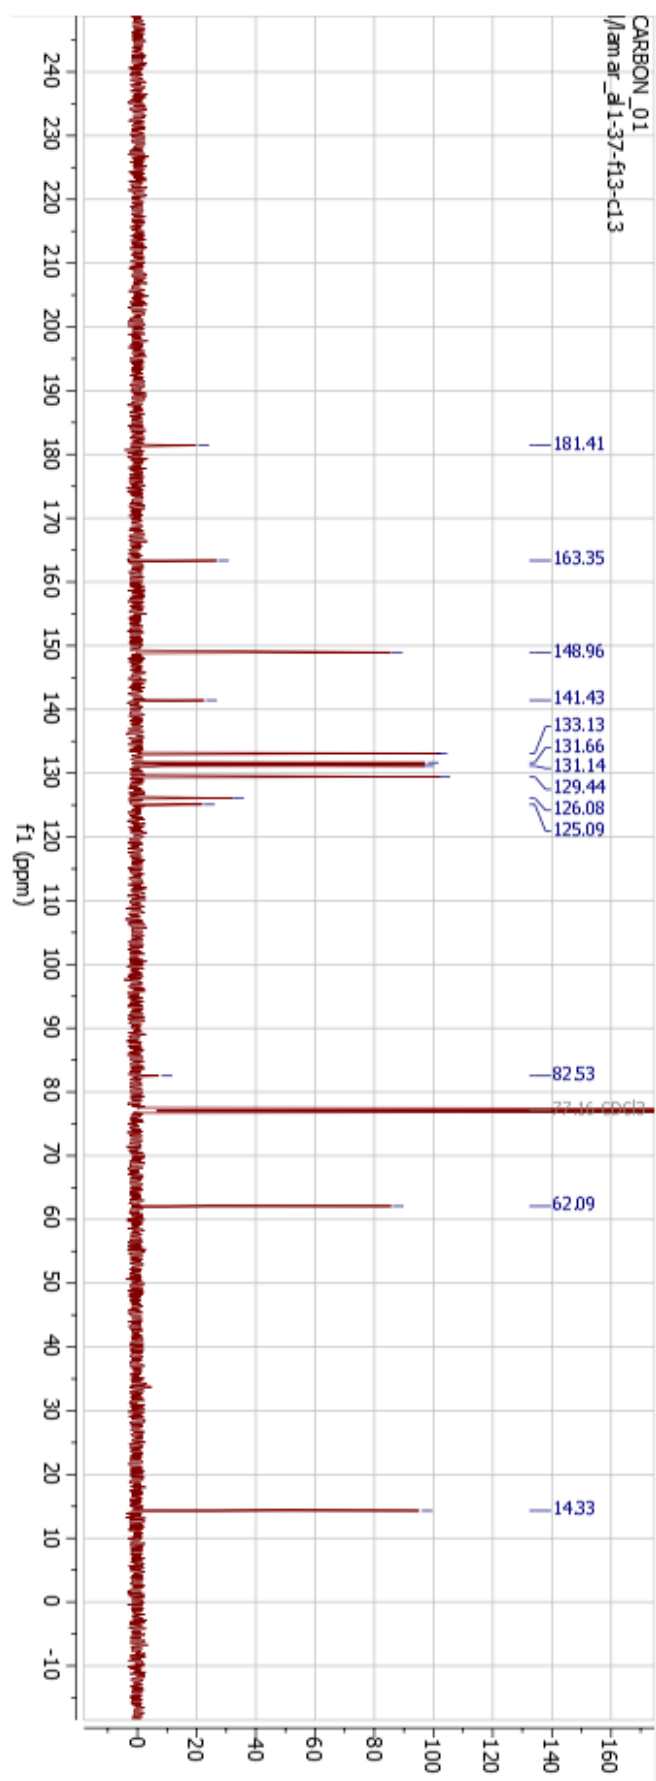

Figure S33.  $^{13}\text{C}$  NMR of Product 10.



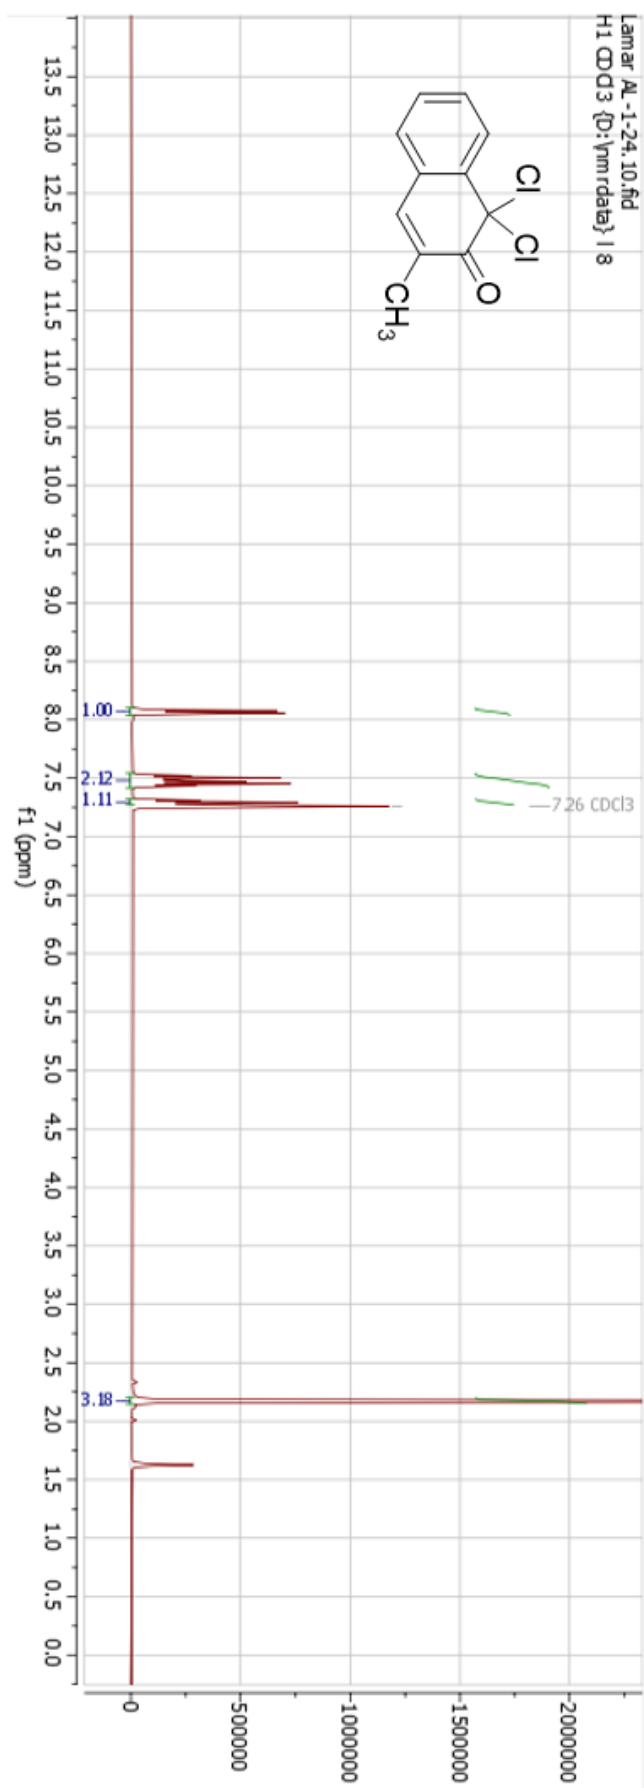

Figure S34. <sup>1</sup>H NMR of Product 11.

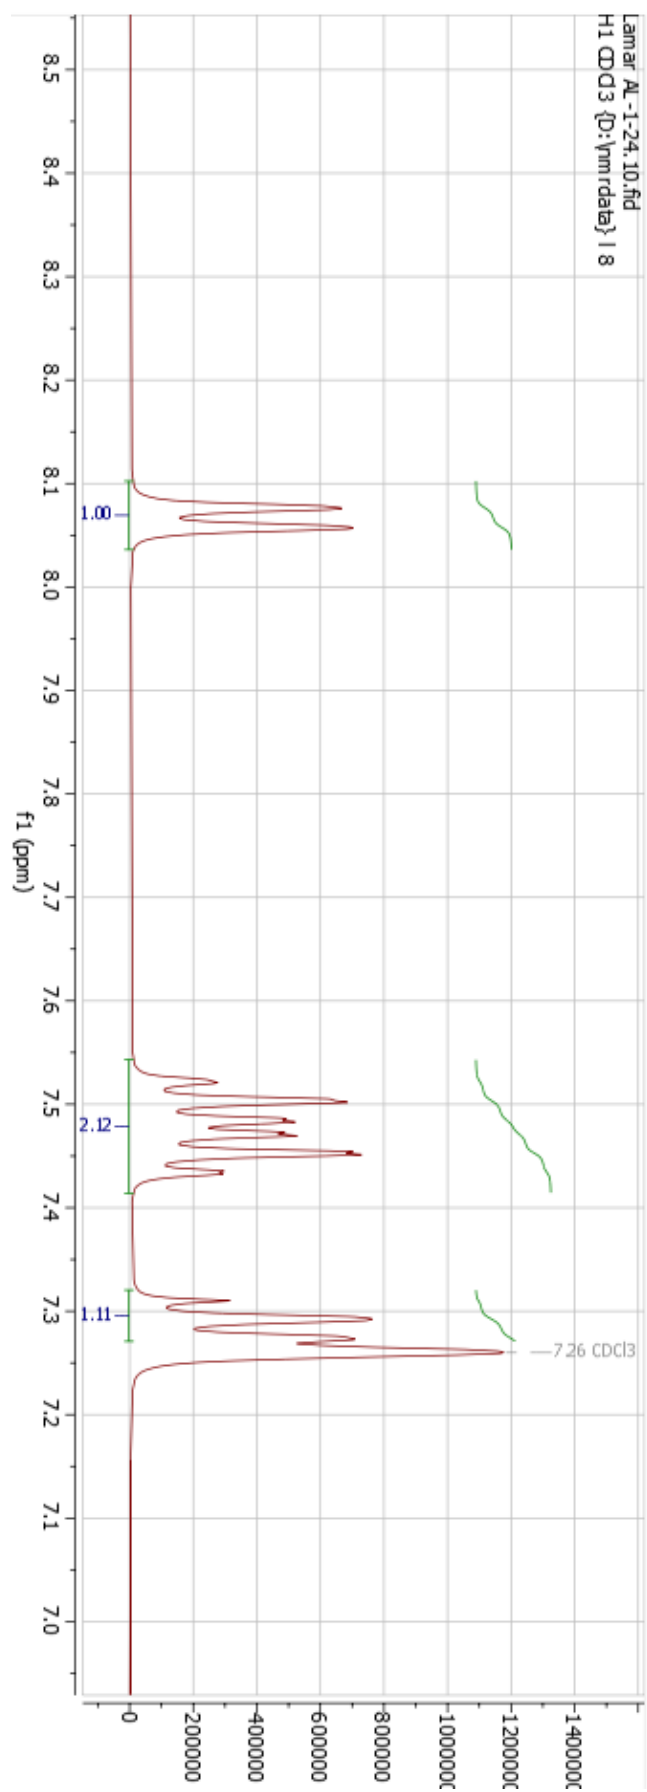

**Figure S35.** Zoomed in aromatic region of  $^1\text{H}$  NMR of Product **11**.

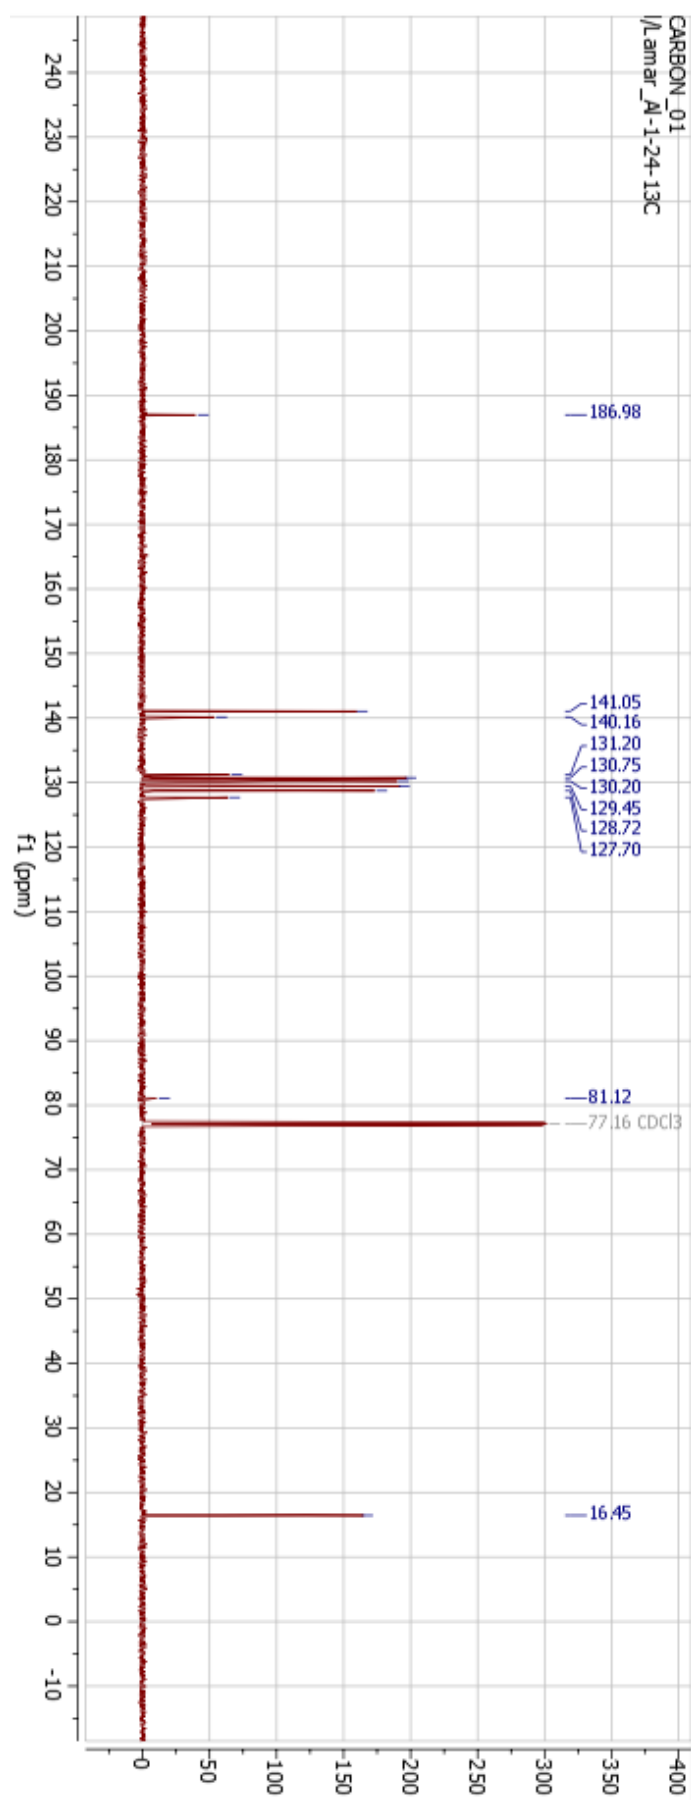

Figure S36.  $^{13}\text{C}$  NMR of Product 11.

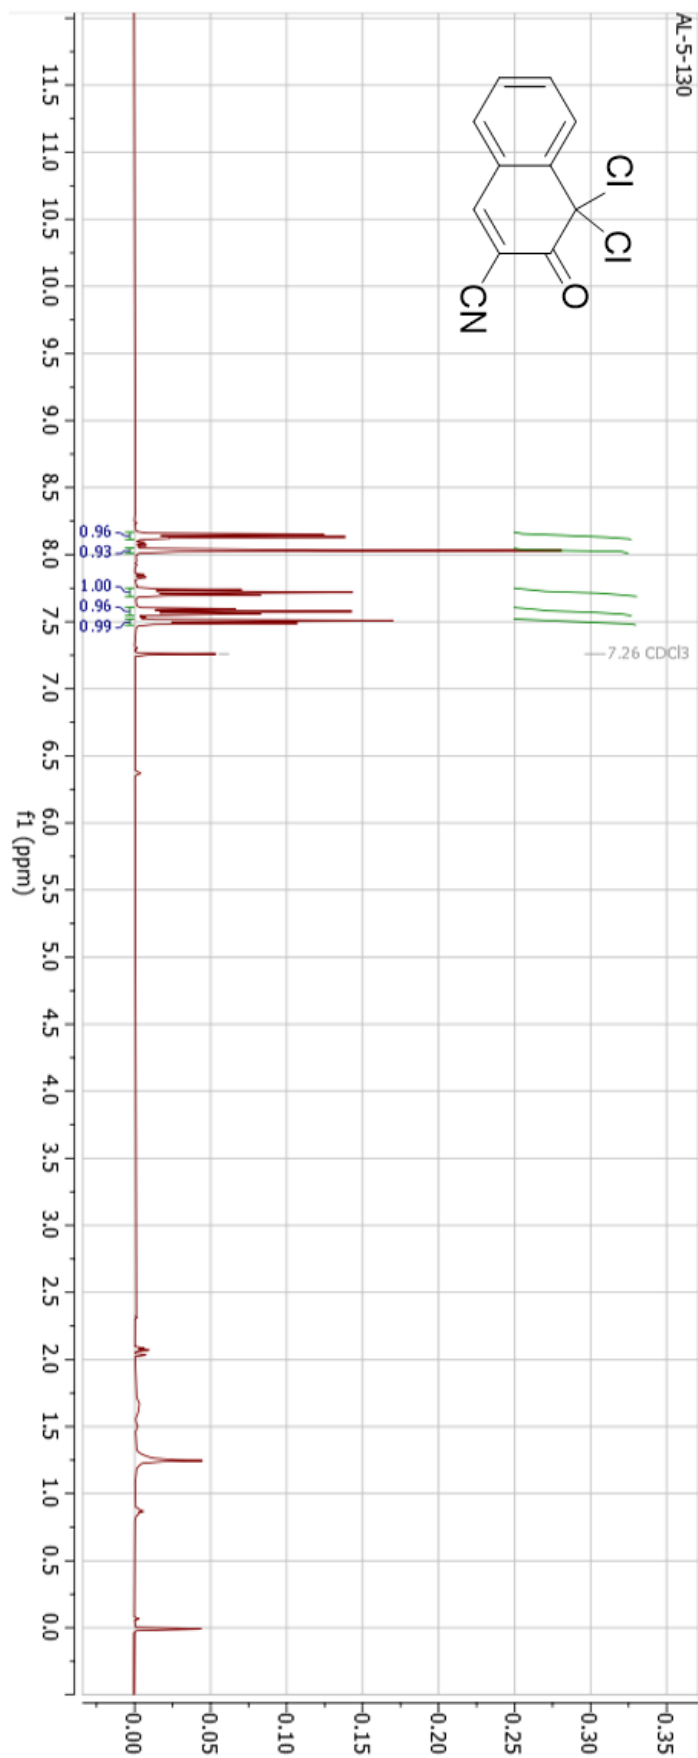

Figure S37. <sup>1</sup>H NMR of Product 12.

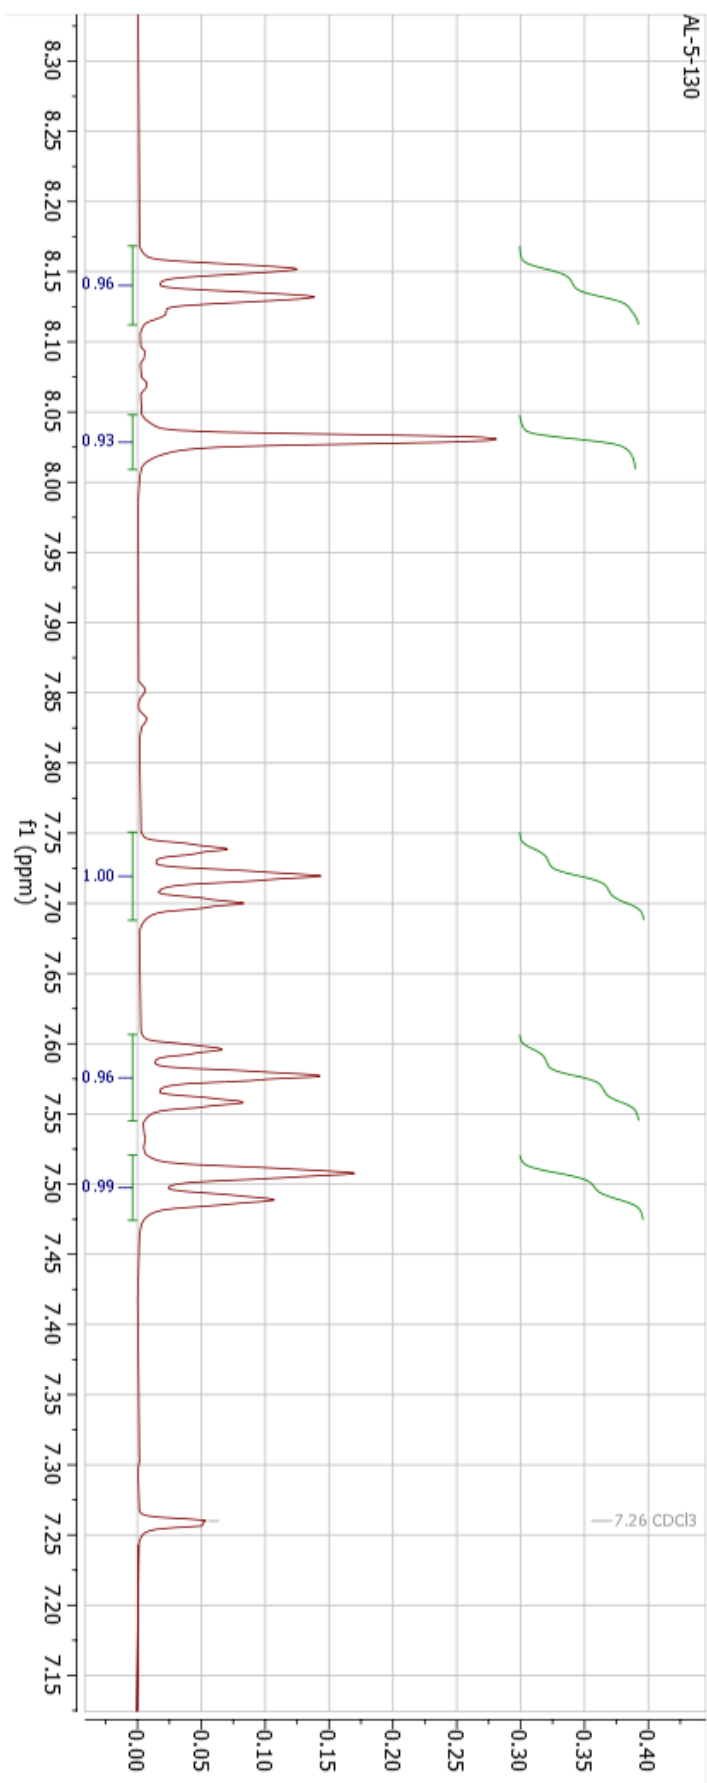

**Figure S38.** Zoomed in aromatic region of  $^1\text{H}$  NMR of Product 12.

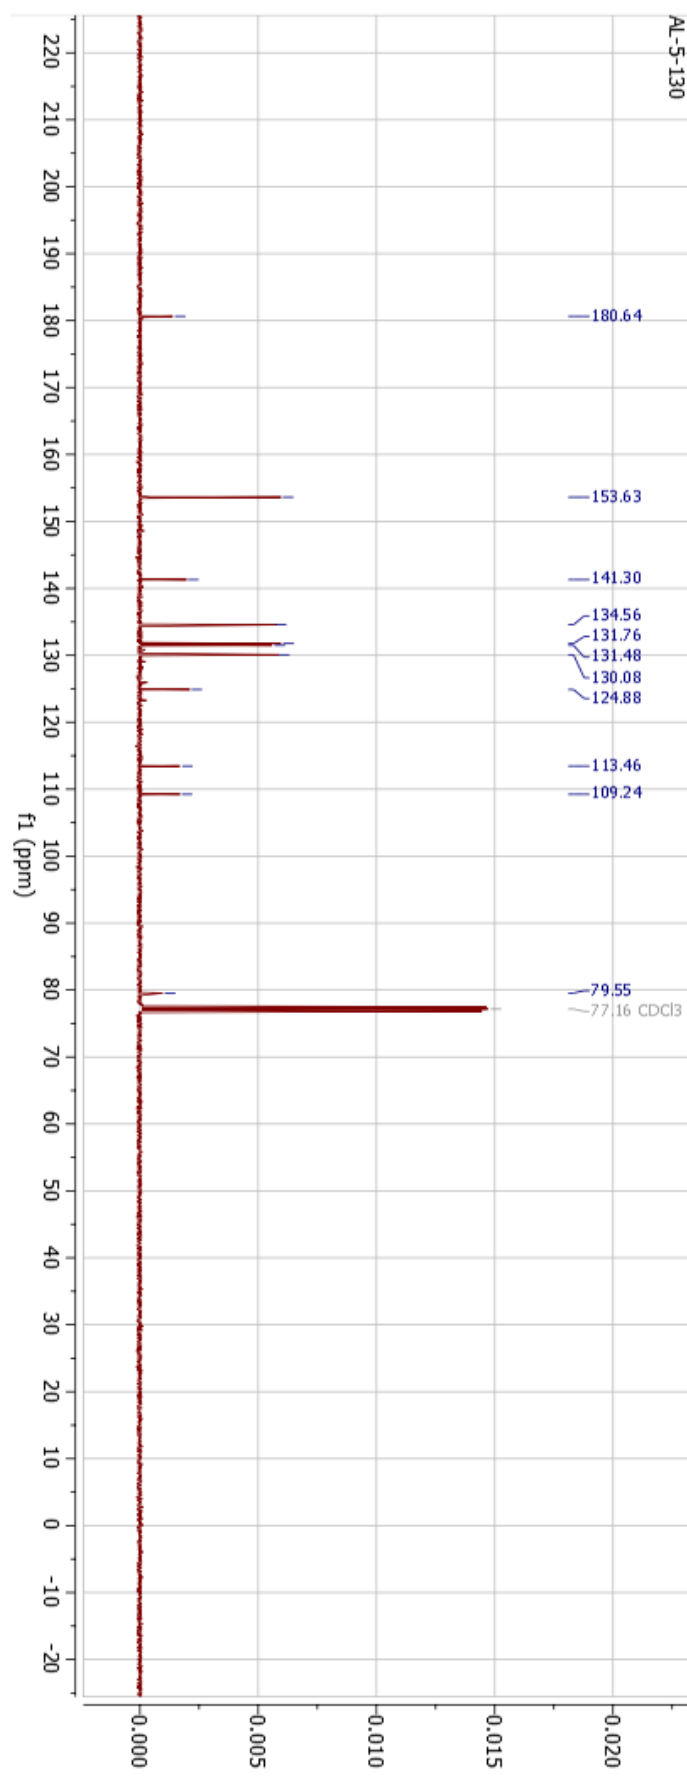

Figure S39. <sup>13</sup>C NMR of Product 12.

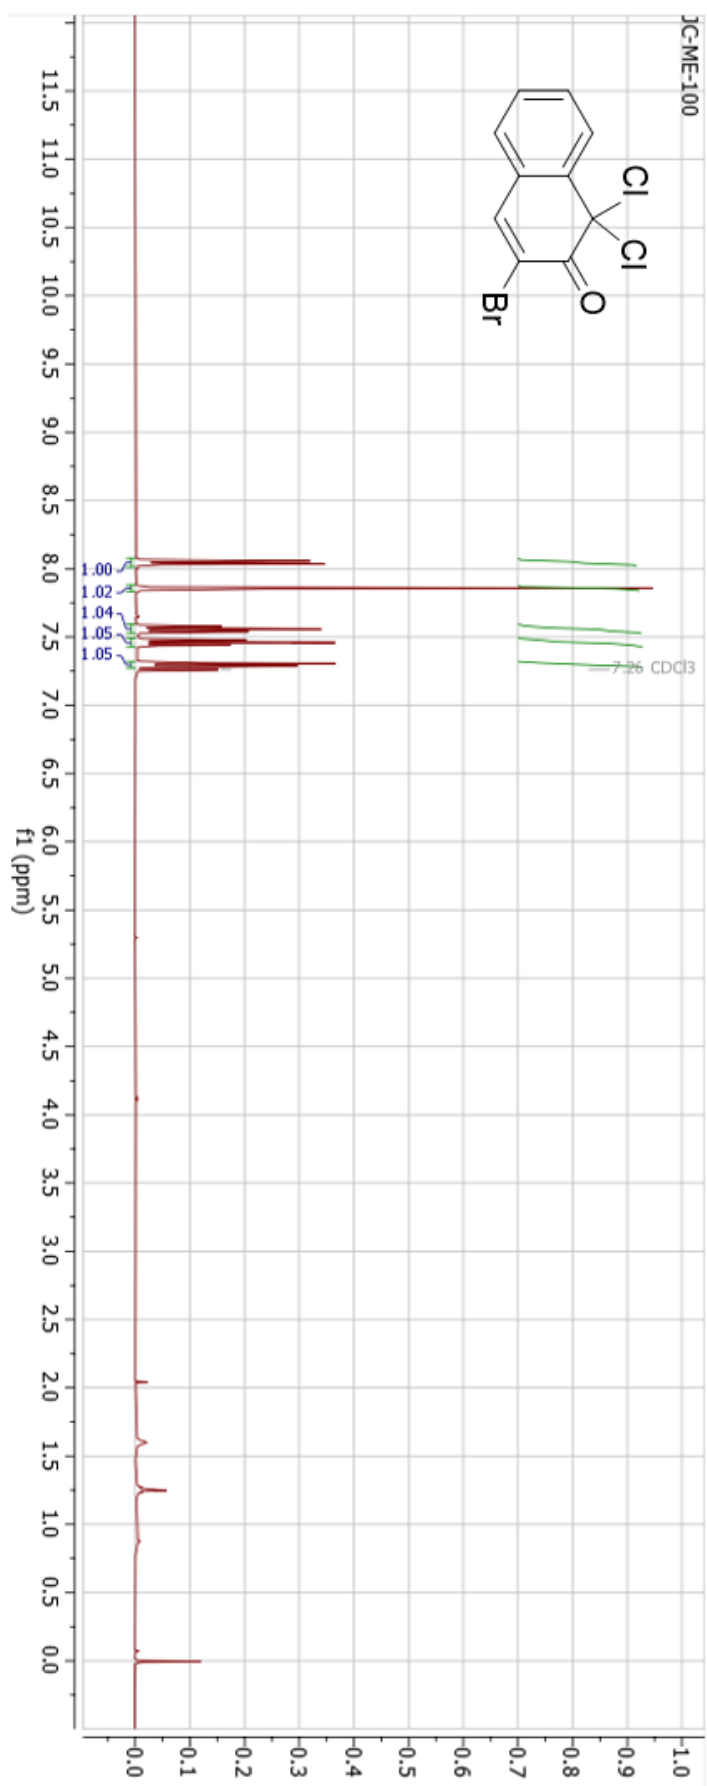

Figure S40. <sup>1</sup>H NMR of Product 13.

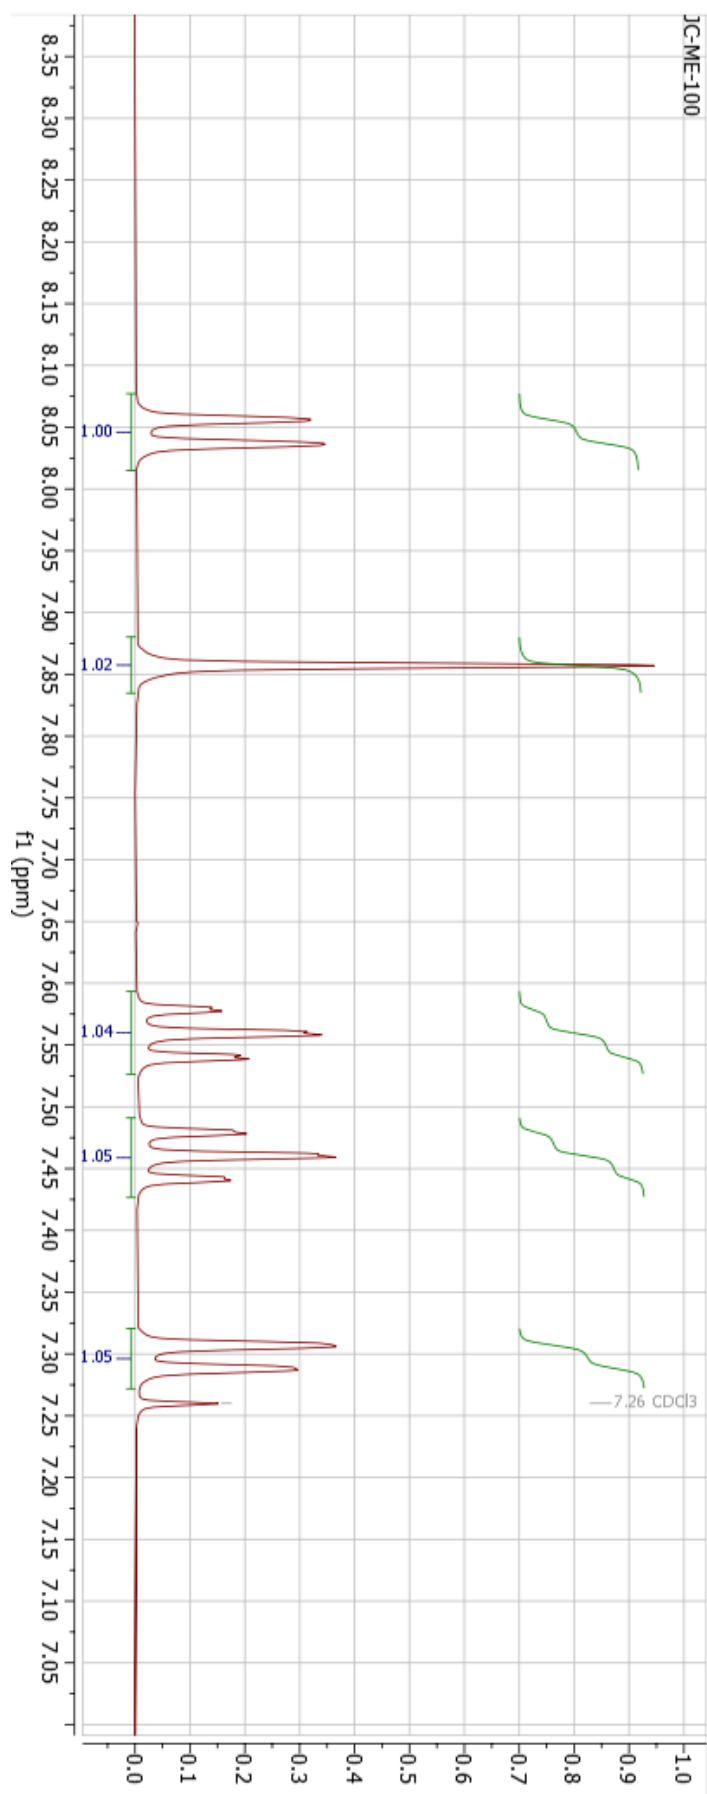

**Figure S41.** Zoomed in aromatic region of  $^1\text{H}$  NMR of Product 13.



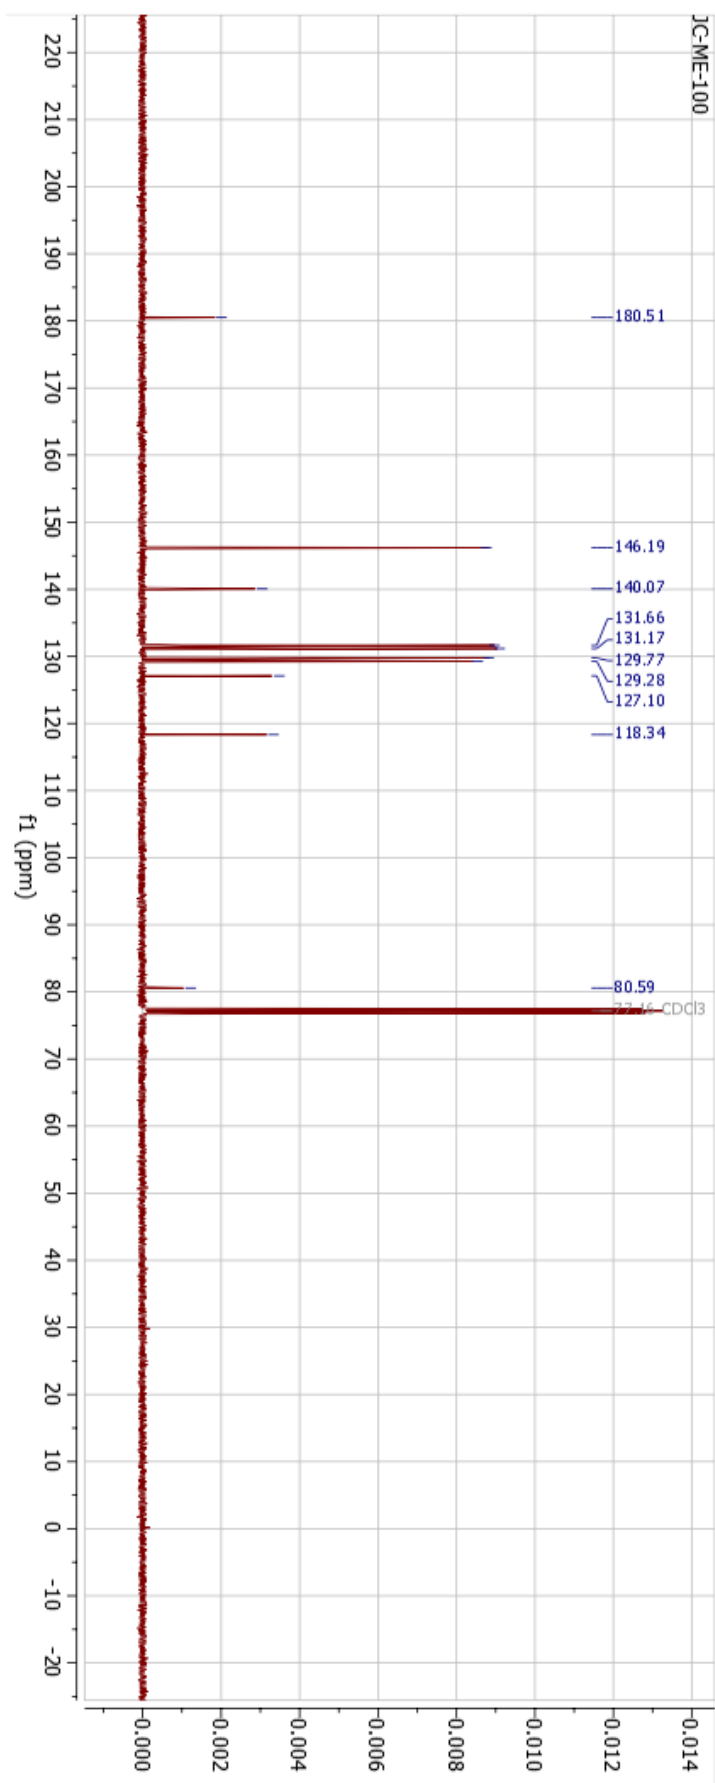

**Figure S42.** <sup>13</sup>C NMR of Product 13.

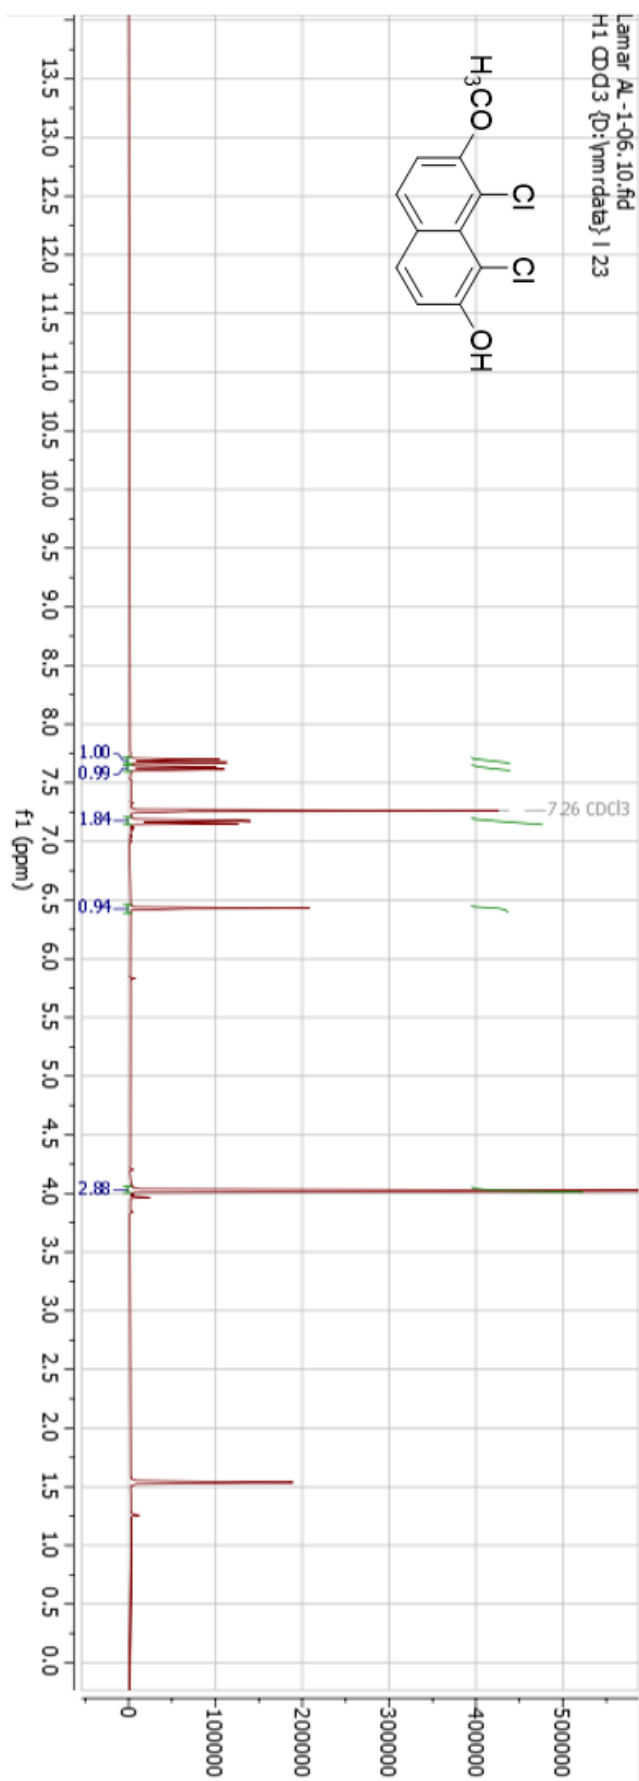

Figure S43. <sup>1</sup>H NMR of Product 14.

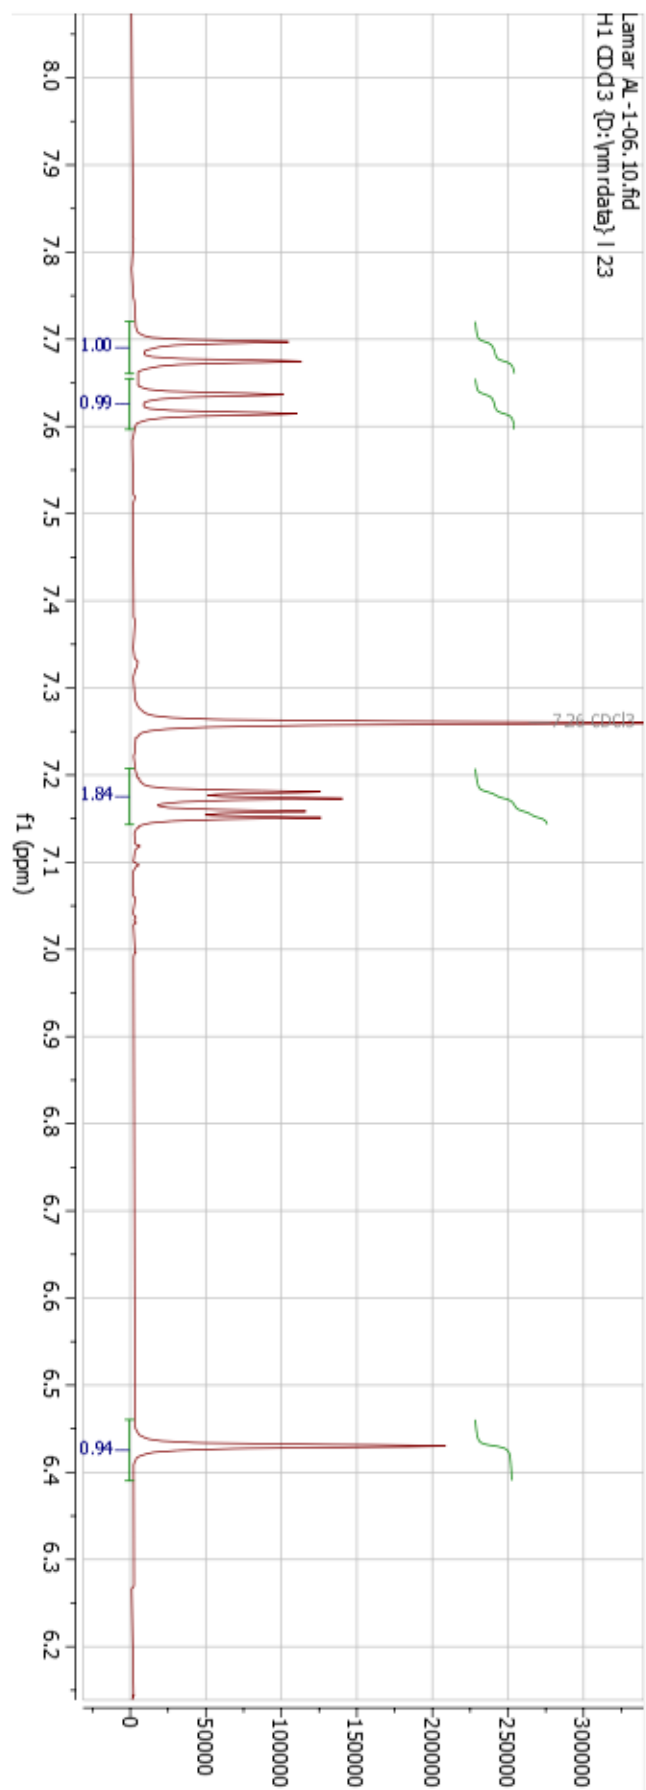

**Figure S44.** Zoomed in aromatic region of  $^1\text{H}$  NMR of Product 14.

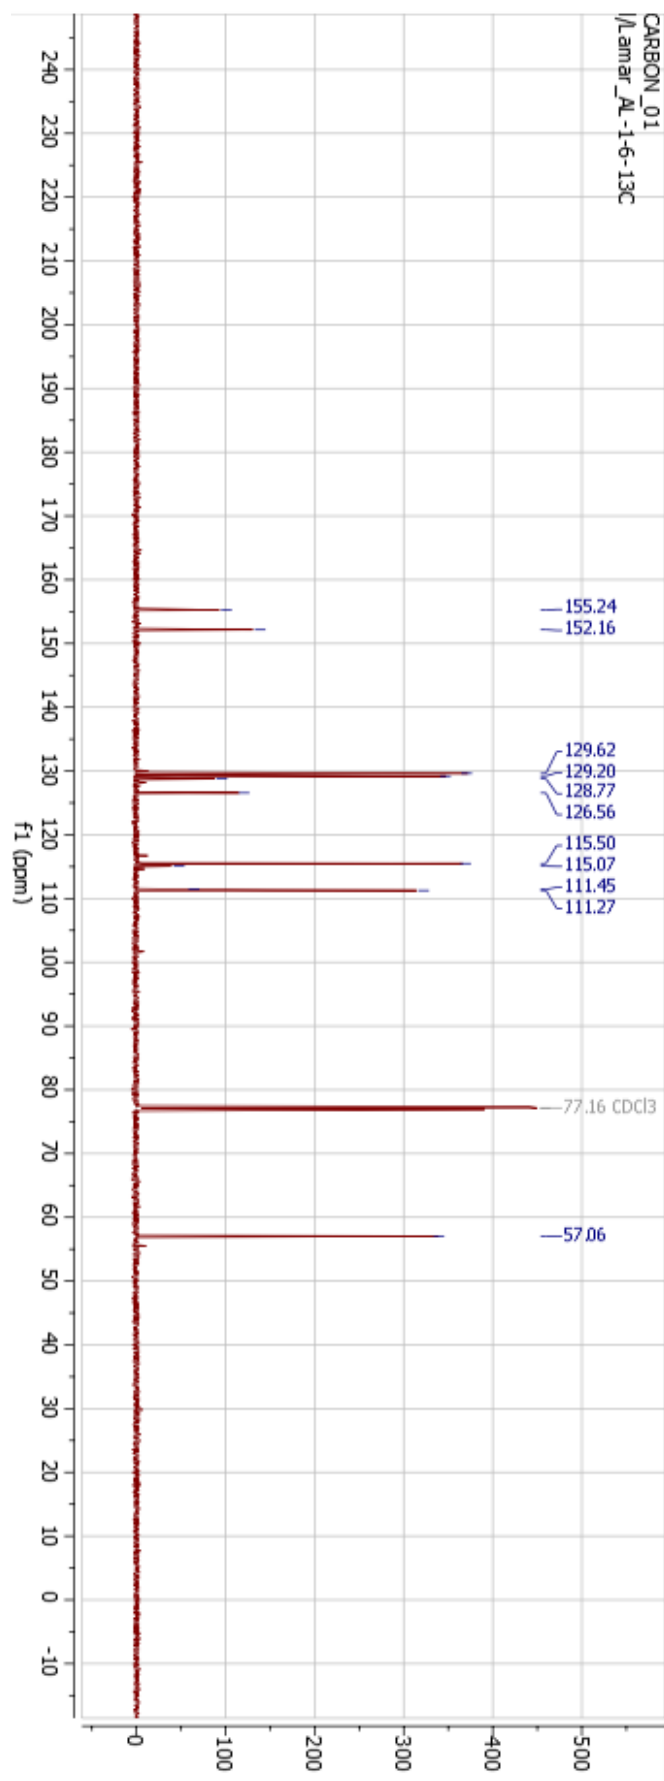

Figure S45. <sup>13</sup>C NMR of Product 14.

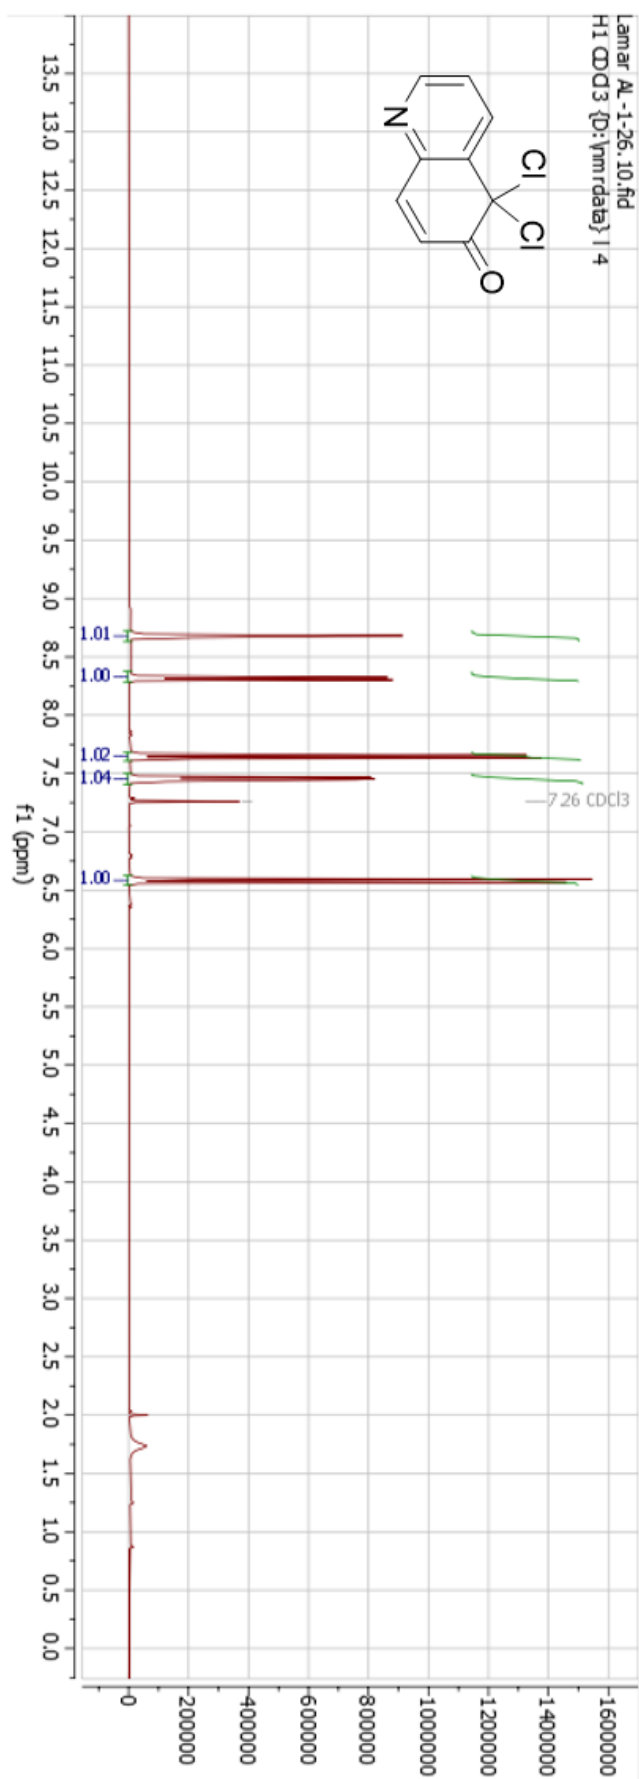

Figure S46. <sup>1</sup>H NMR of Product **15**.

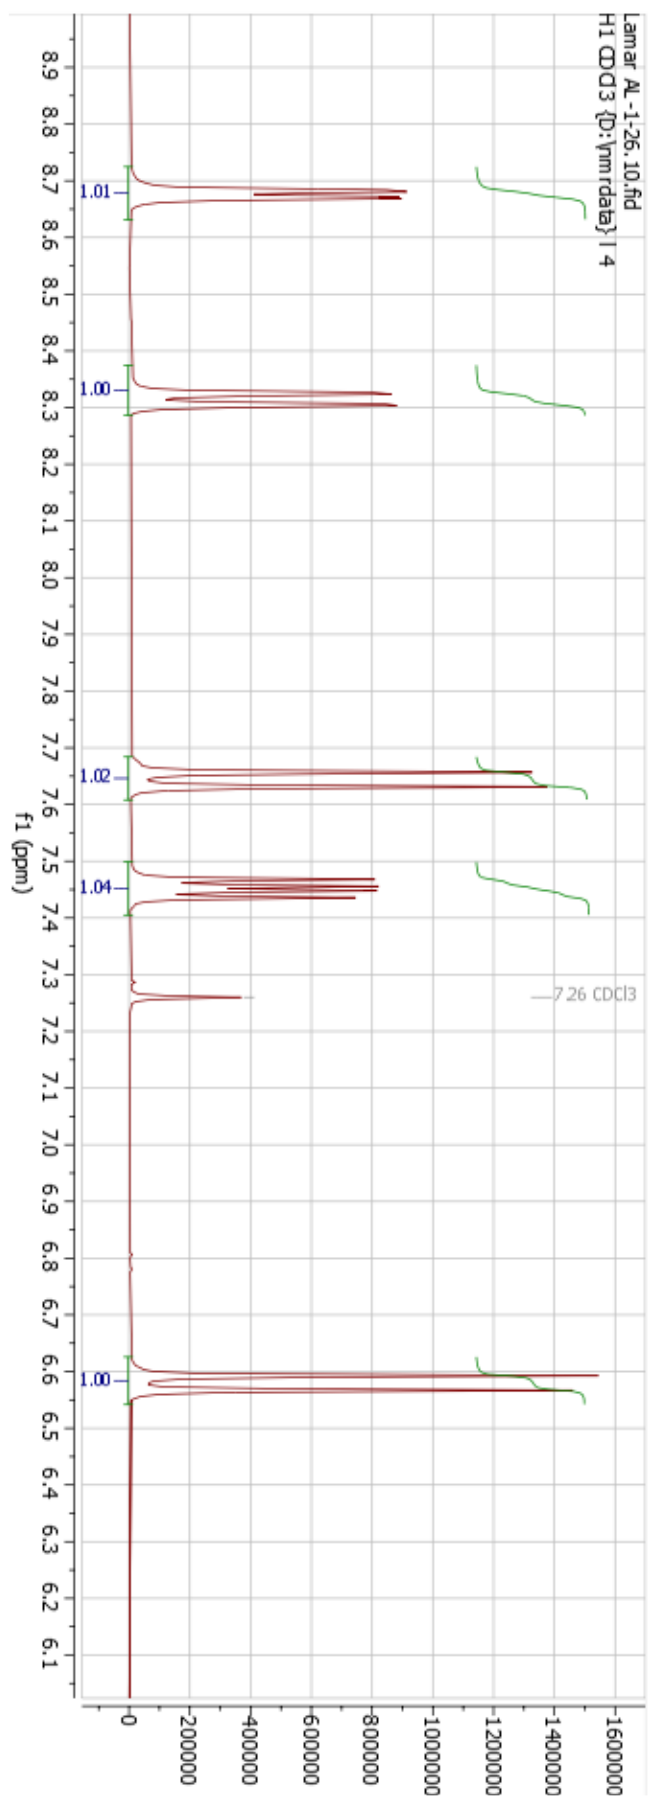

**Figure S47.** Zoomed in aromatic region of  $^1\text{H}$  NMR of Product 15.

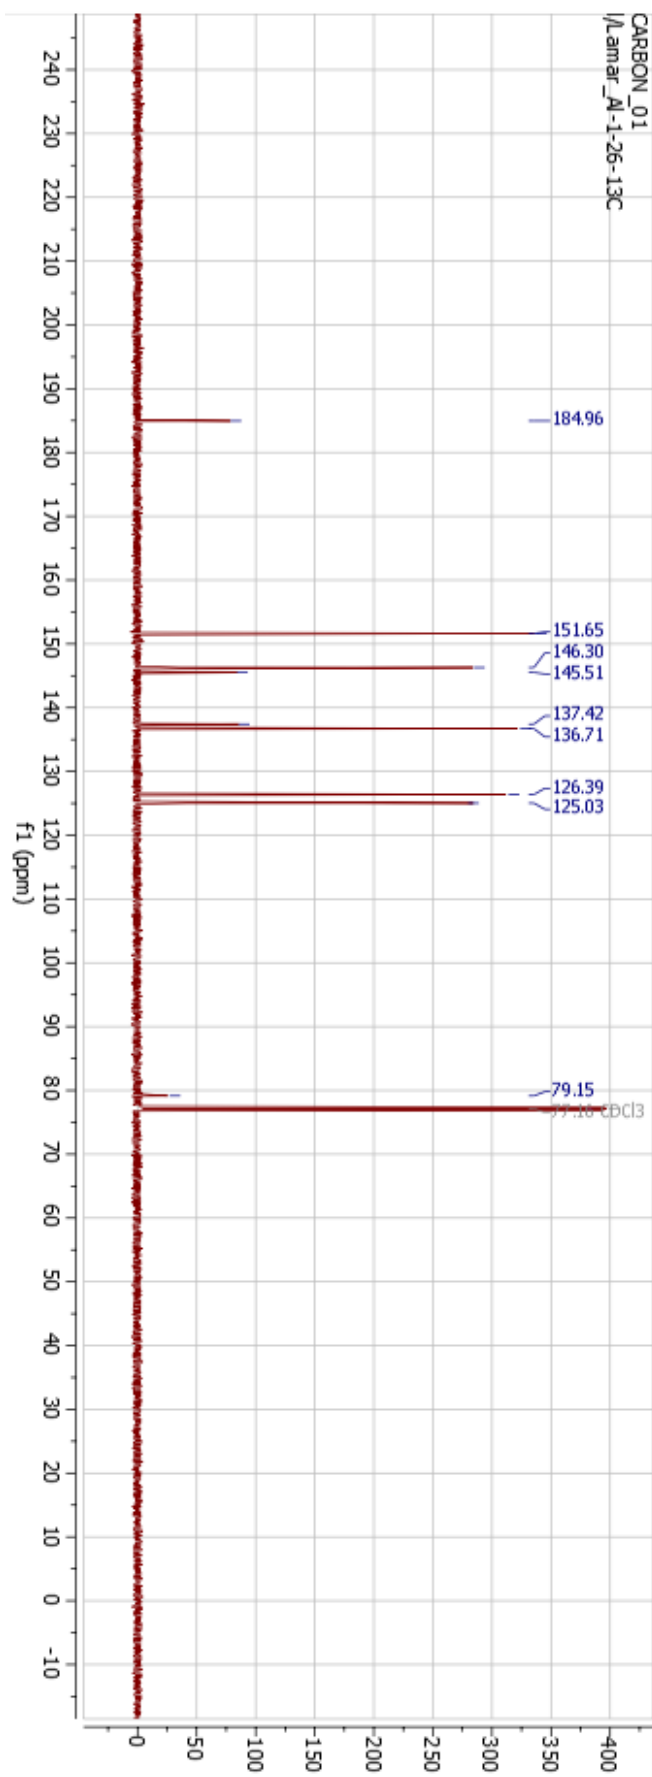

Figure S48.  $^{13}\text{C}$  NMR of Product 15.

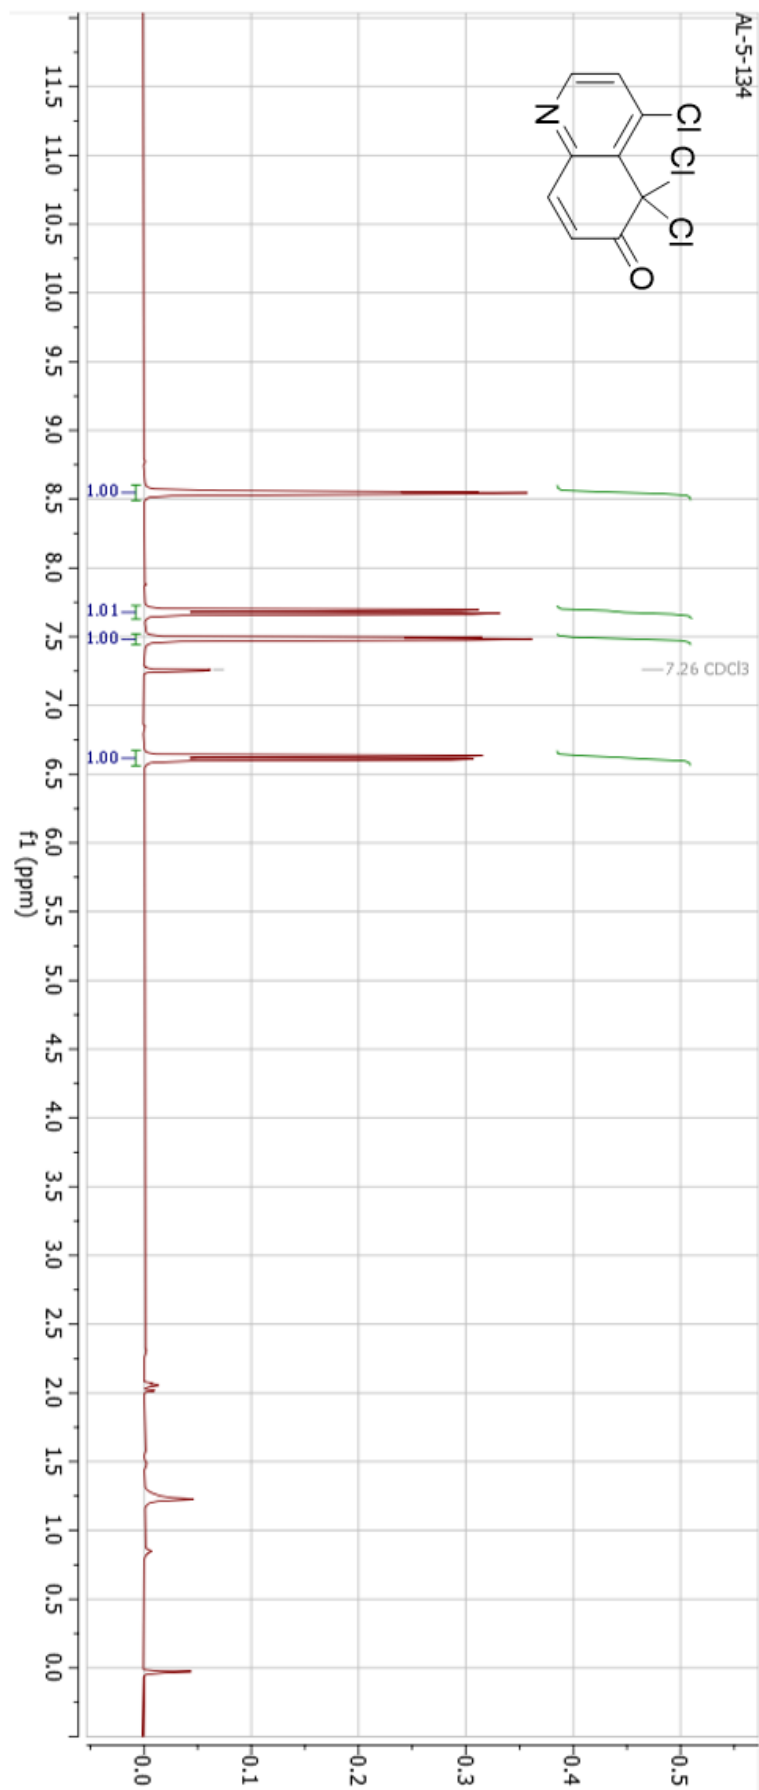

Figure S49. <sup>1</sup>H NMR of Product 16.



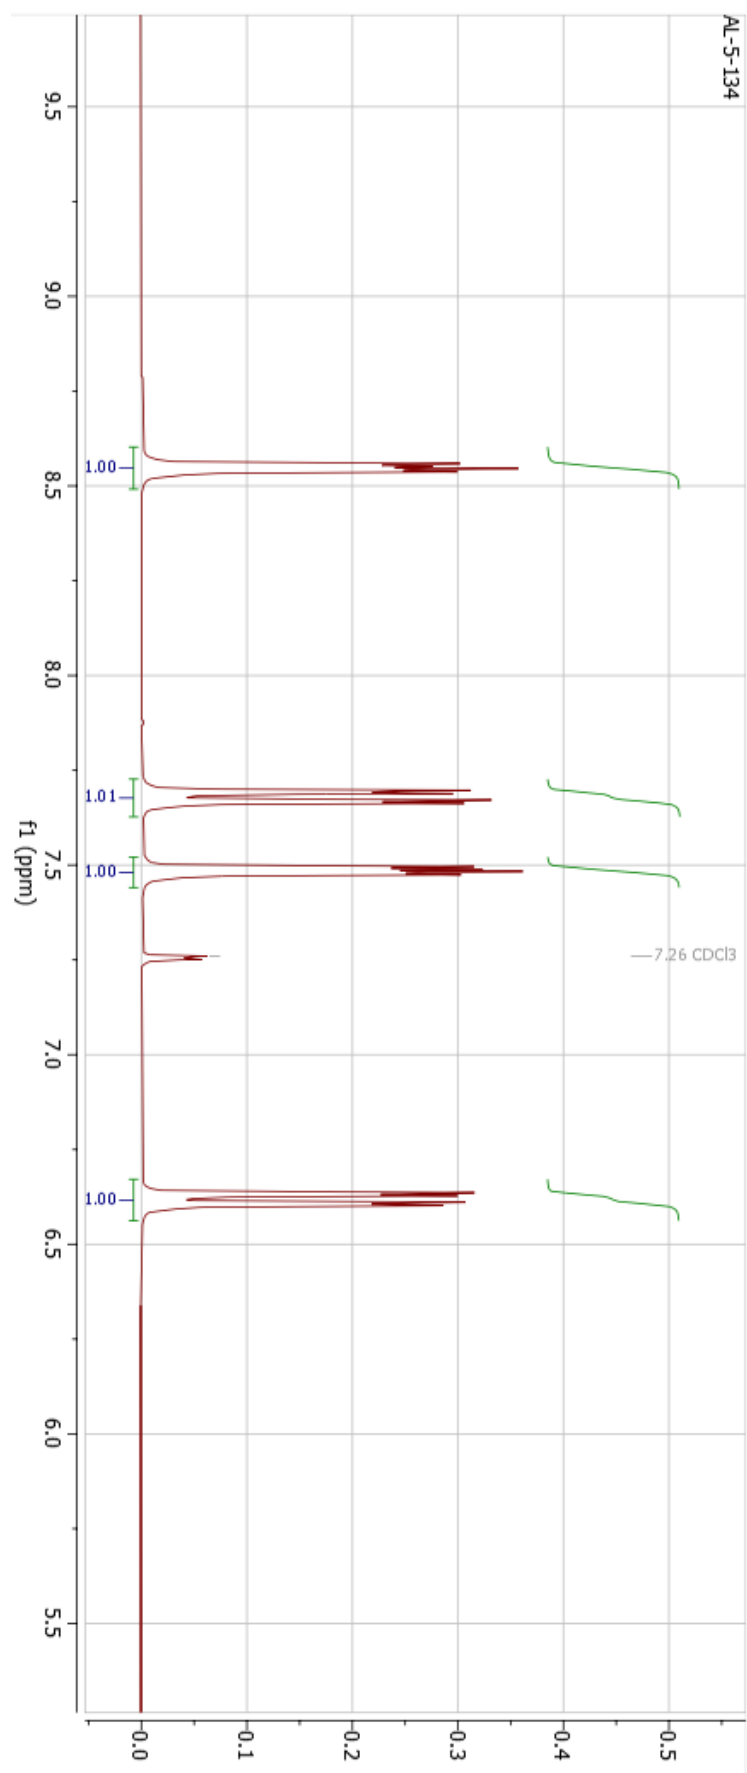

**Figure S50.** Zoomed in aromatic region of  $^1\text{H}$  NMR of Product 16.

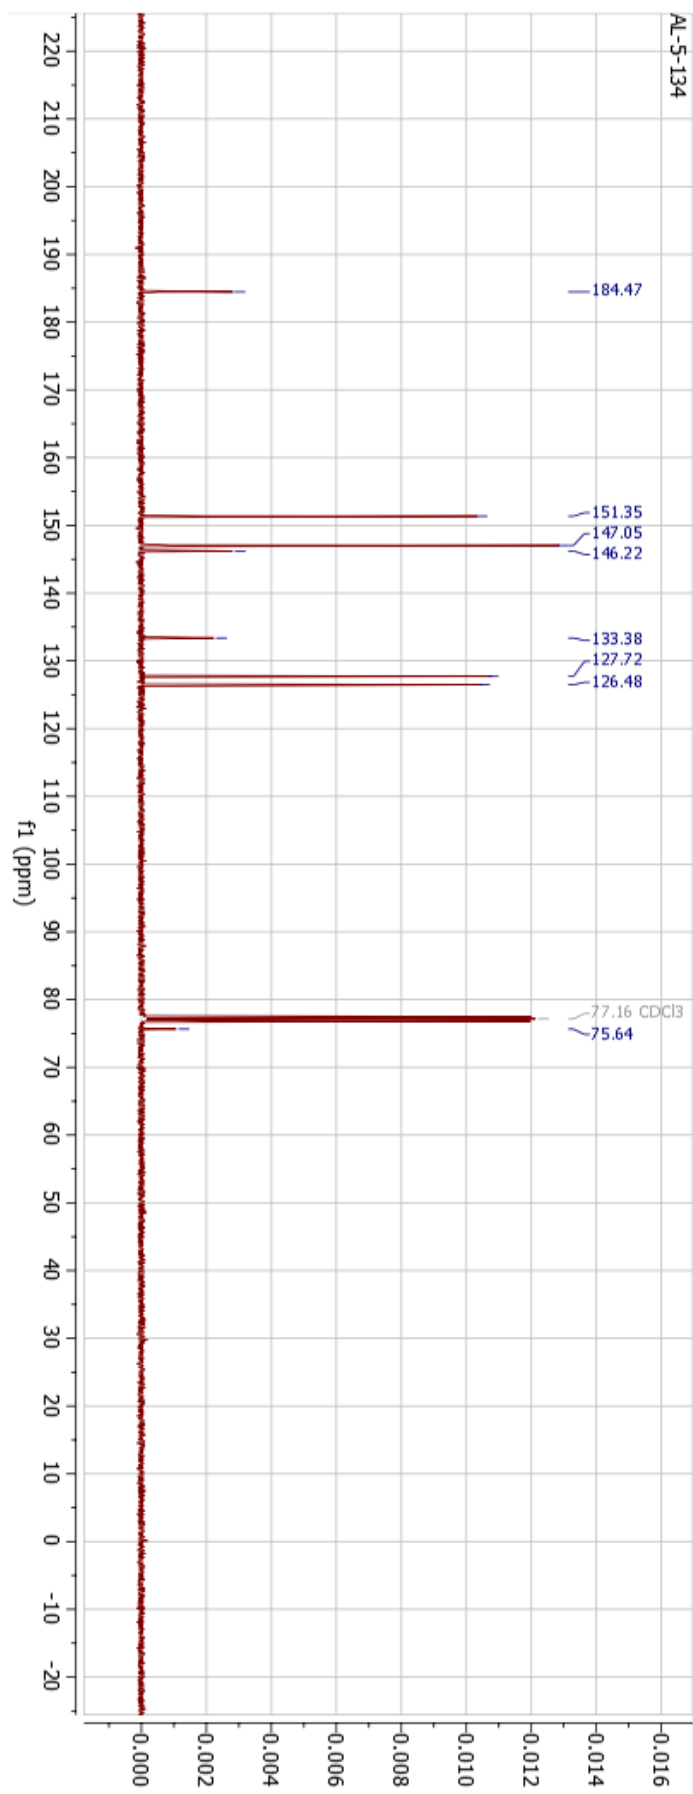

Figure S51.  $^{13}\text{C}$  NMR of Product 16.

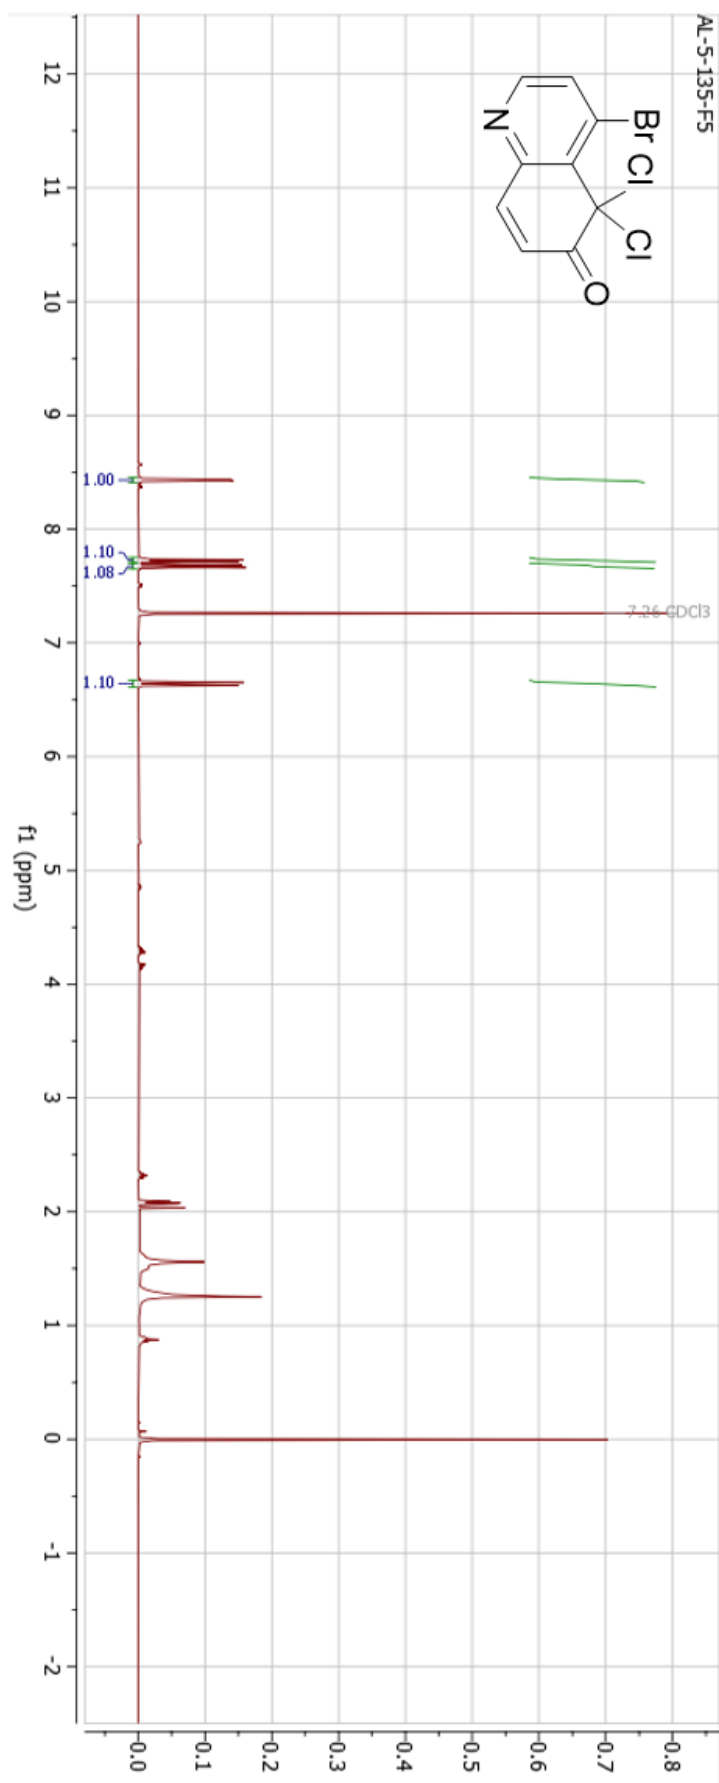

Figure S52. <sup>1</sup>H NMR of Product 17.

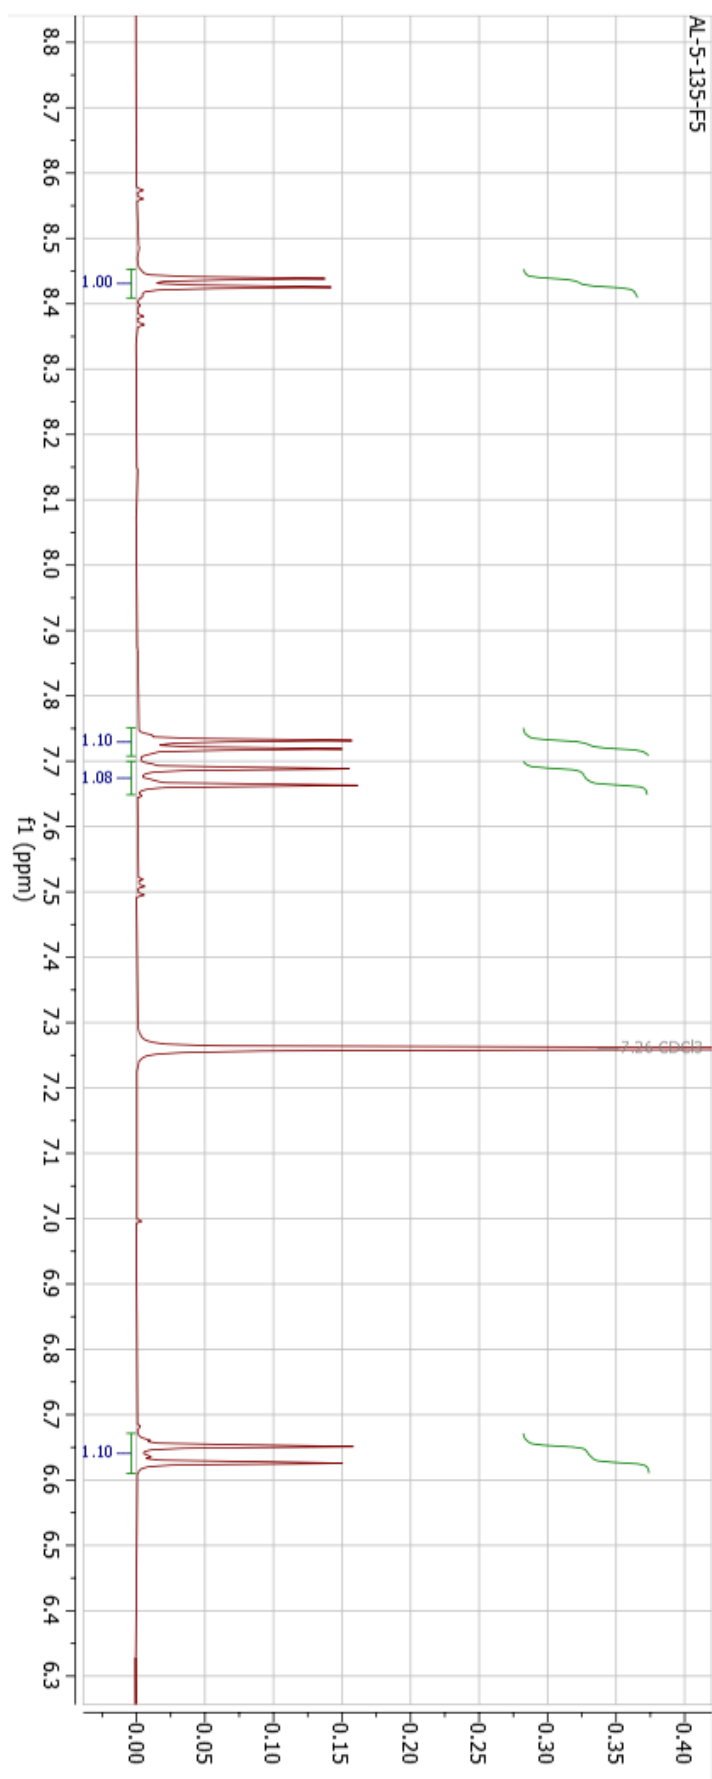

**Figure S53.** Zoomed in aromatic region of  $^1\text{H}$  NMR of Product **17**.

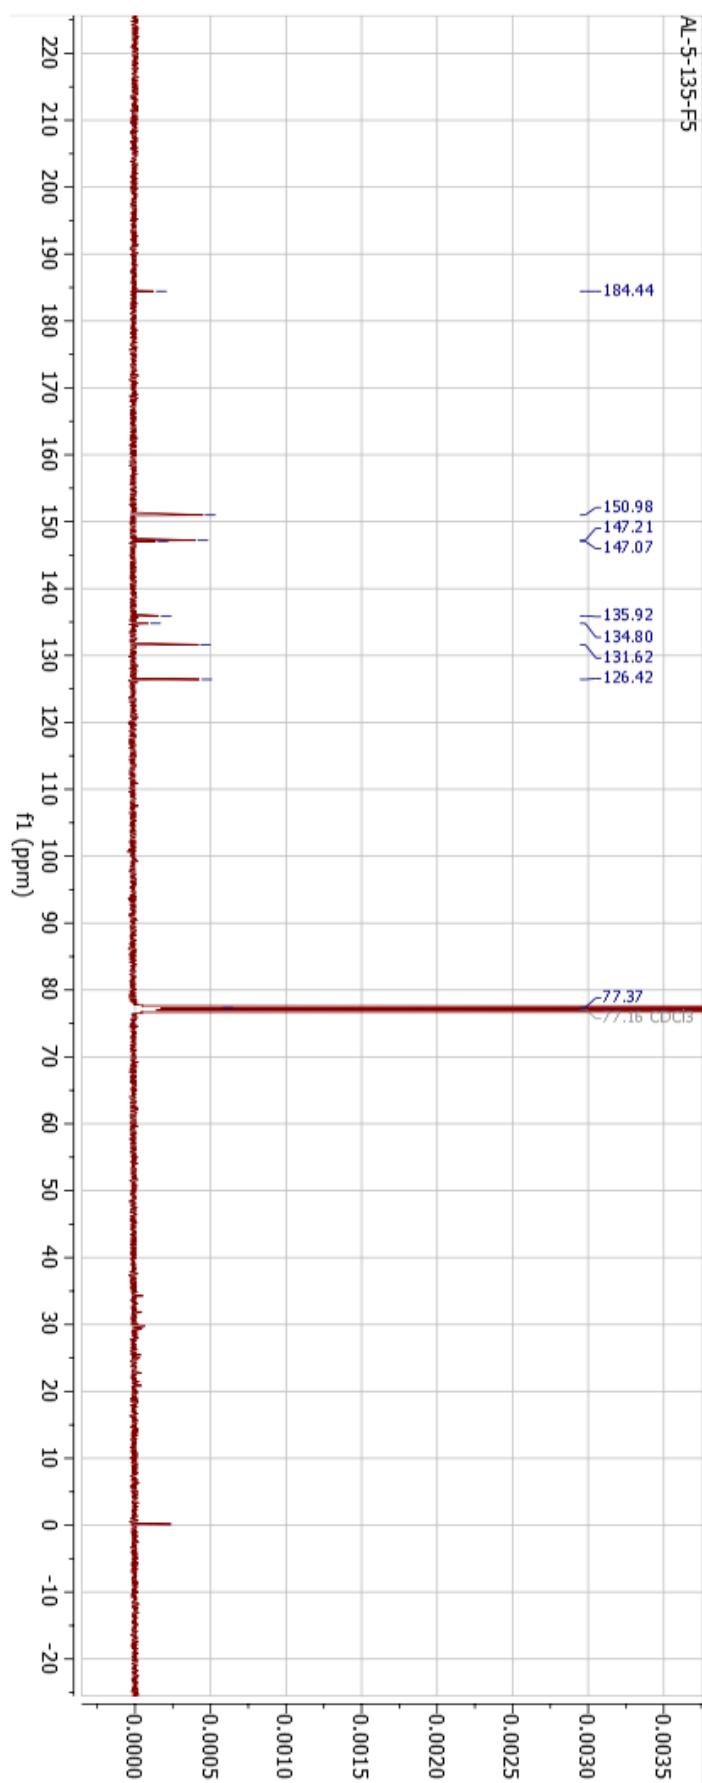

Figure S54.  $^{13}\text{C}$  NMR of Product 17.

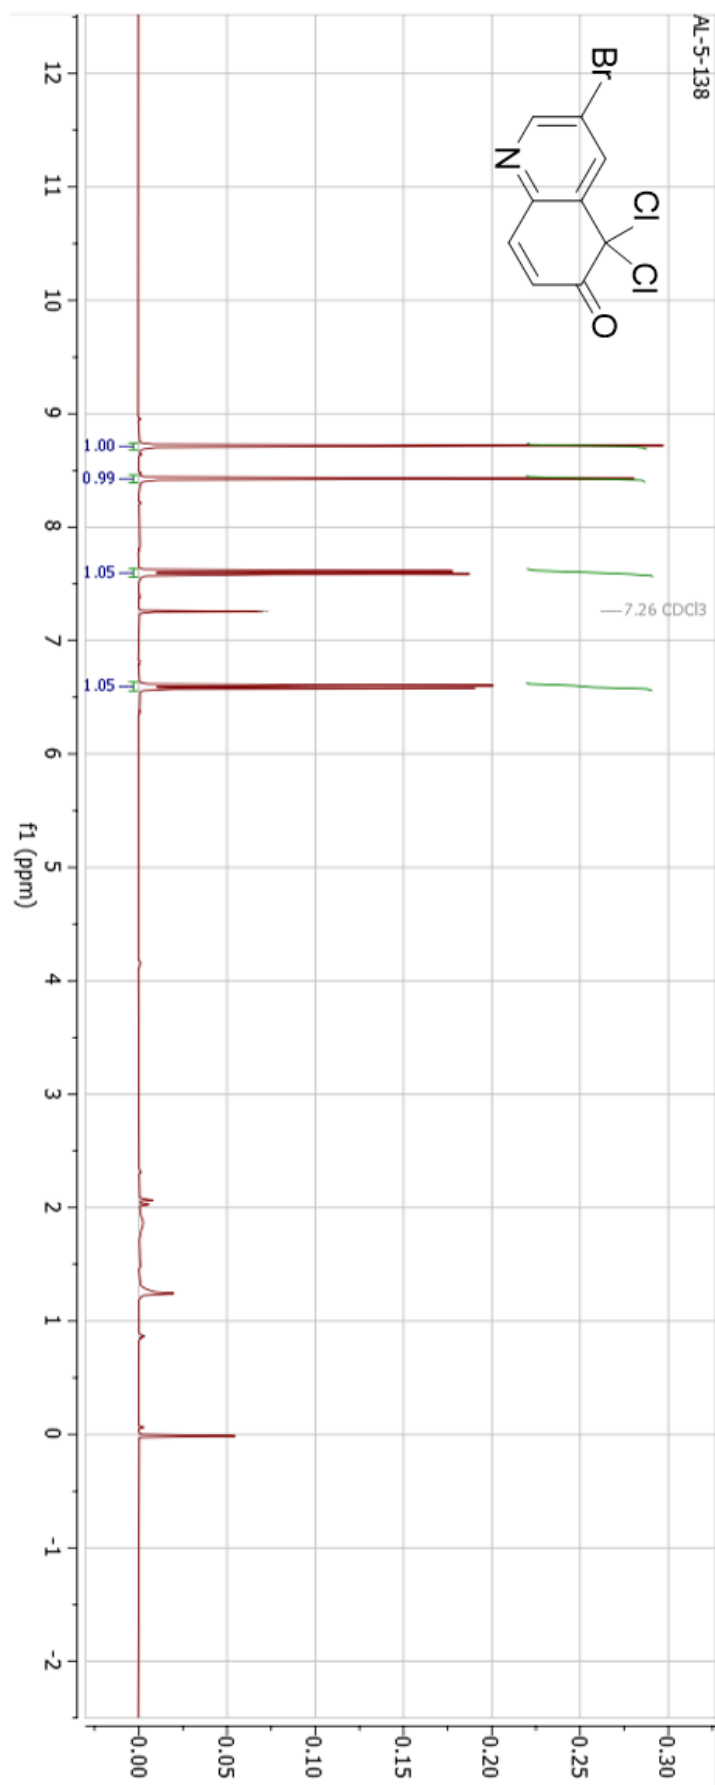

Figure S55.  $^1\text{H}$  NMR of Product 18.

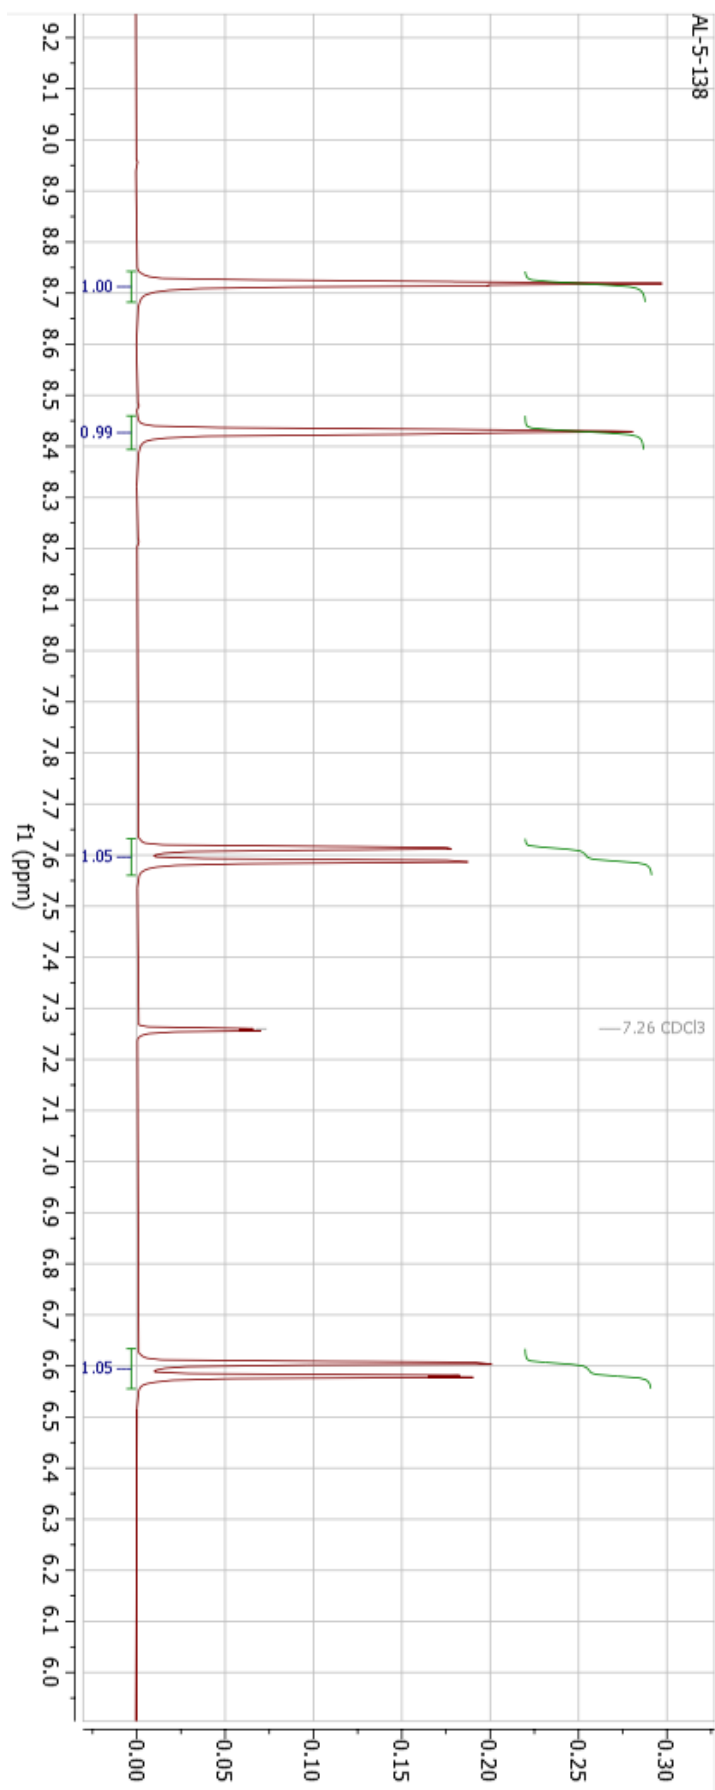

Figure S56. Zoomed in aromatic region of  $^1\text{H}$  NMR of Product 18.

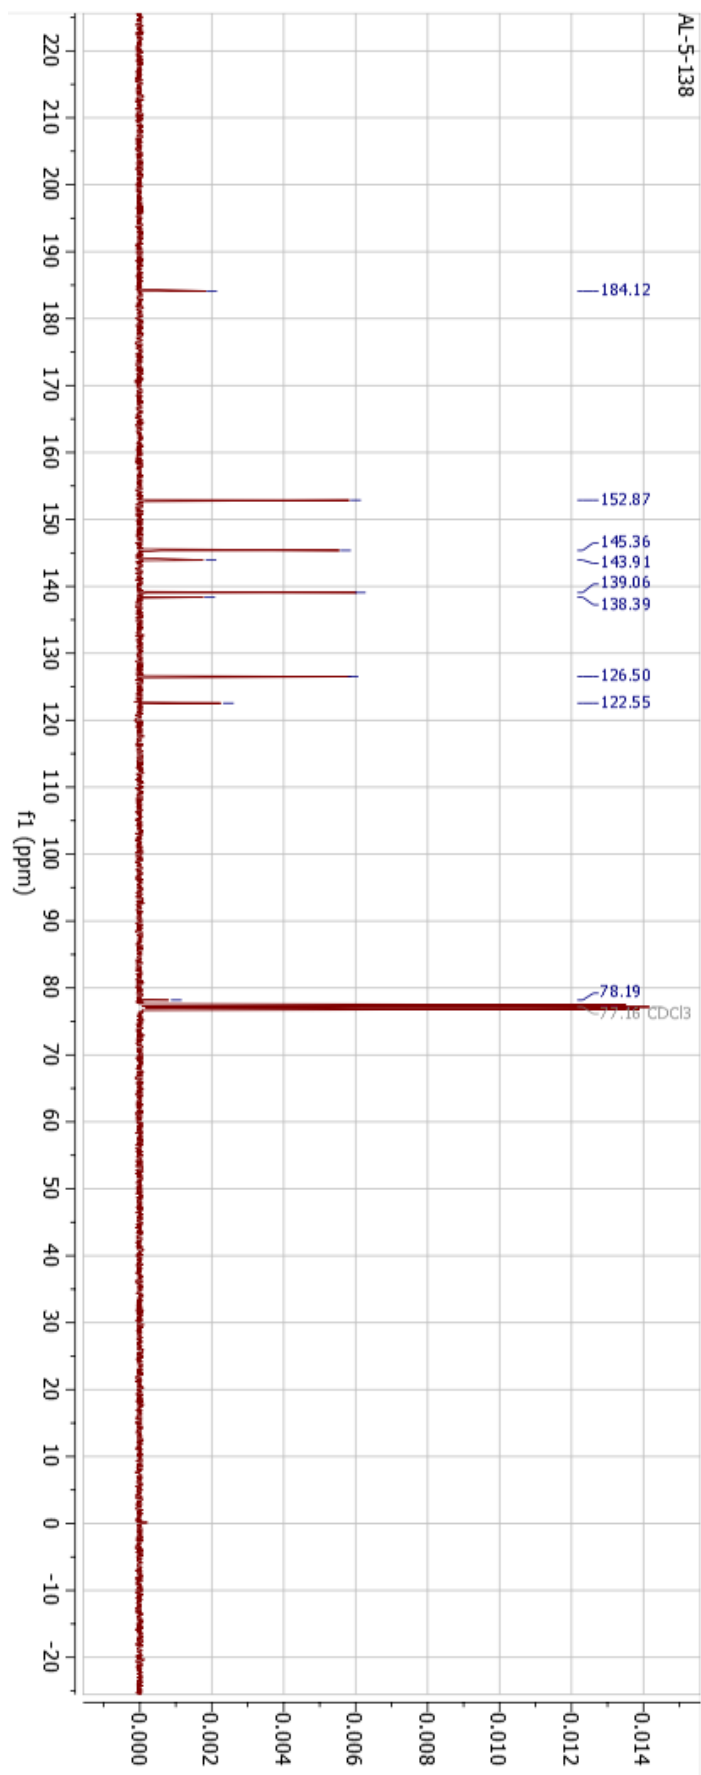

Figure S57.  $^{13}\text{C}$  NMR of Product 18.



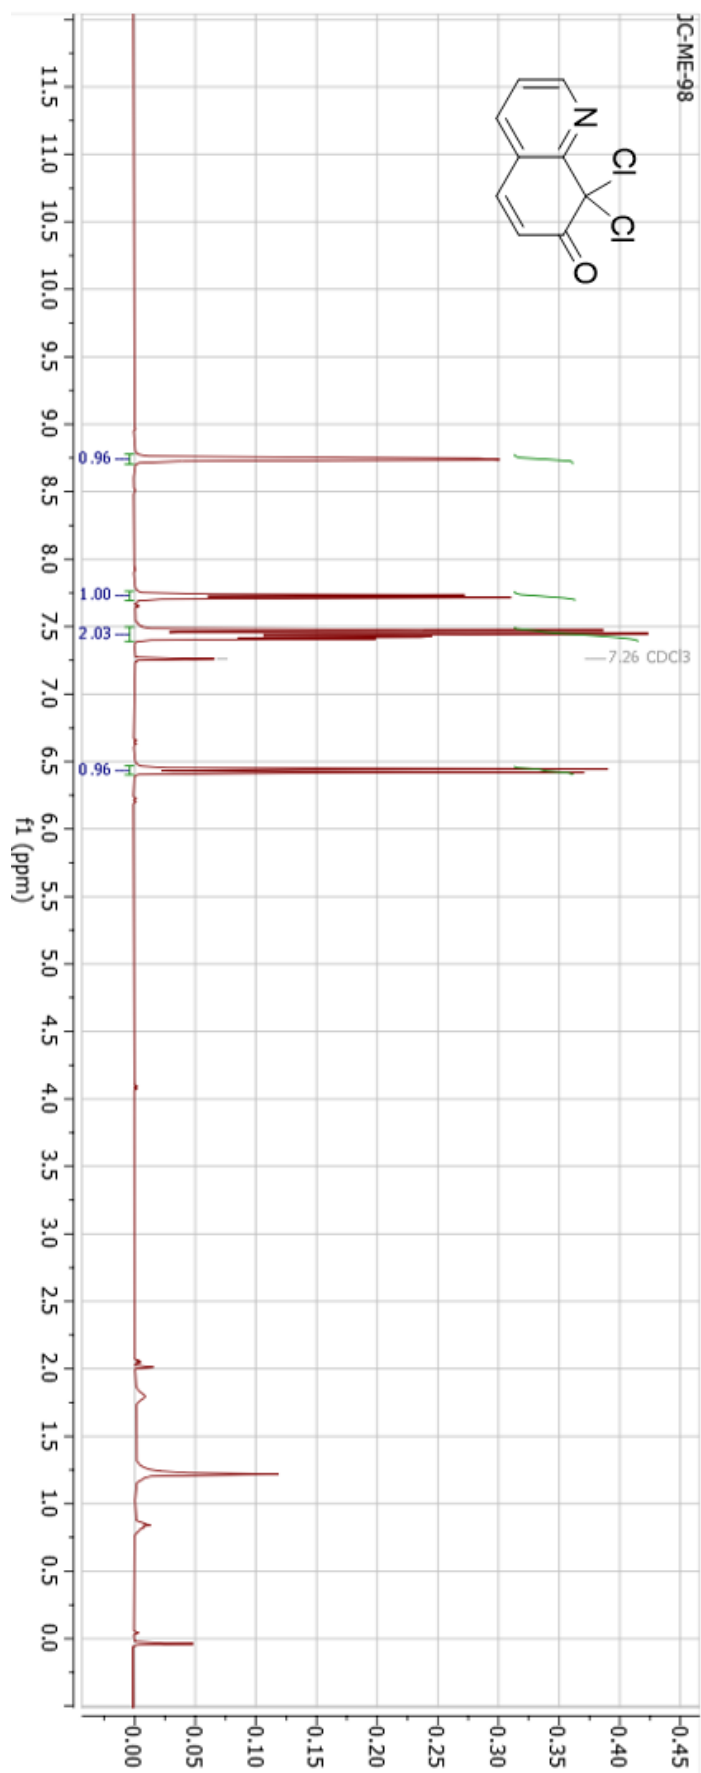

Figure S58. <sup>1</sup>H NMR of Product 19.

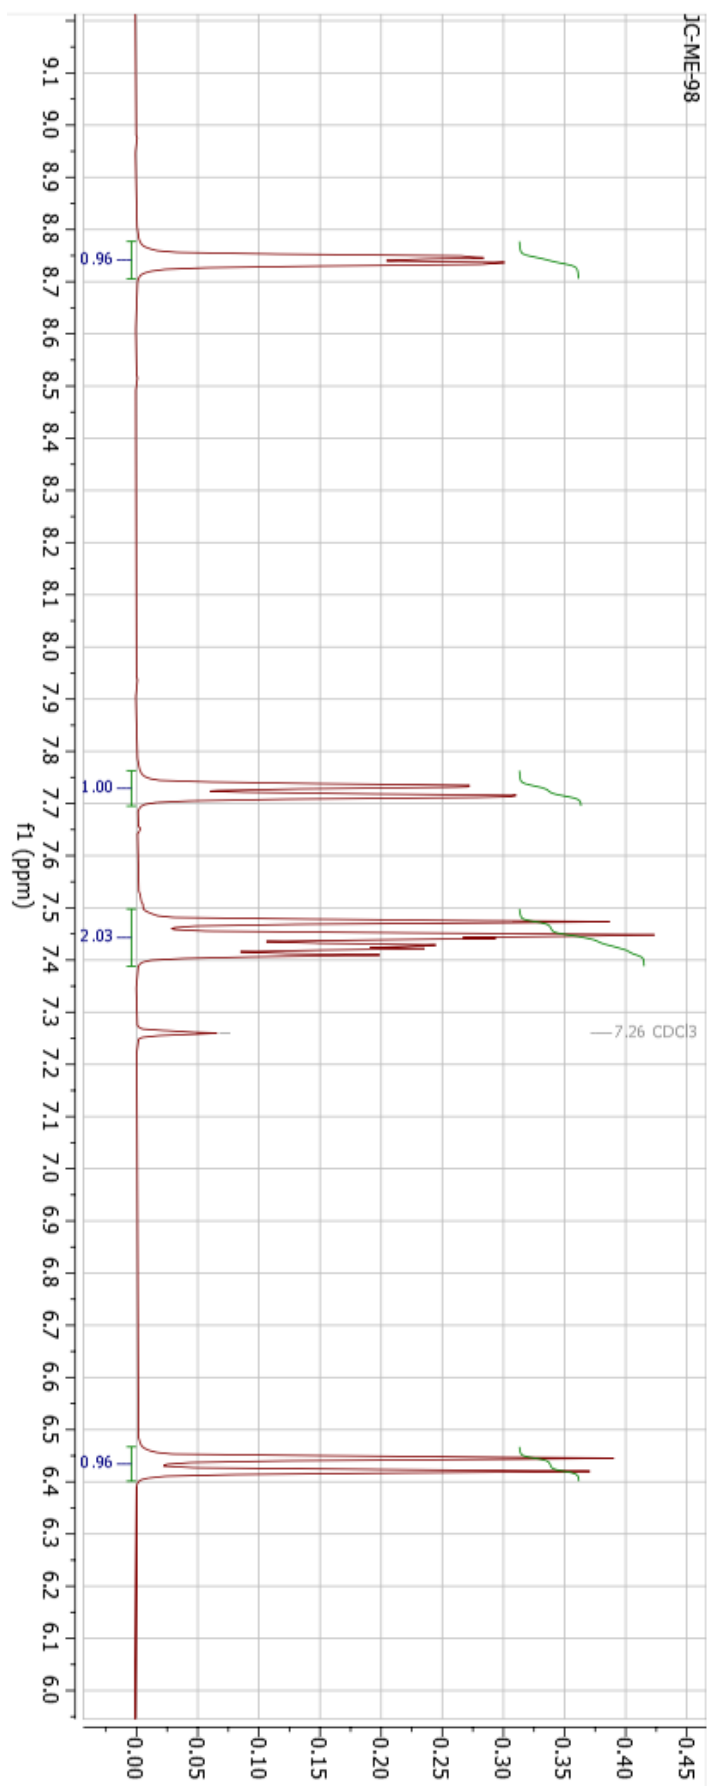

Figure S59. Zoomed in aromatic region of  $^1\text{H}$  NMR of Product 19.

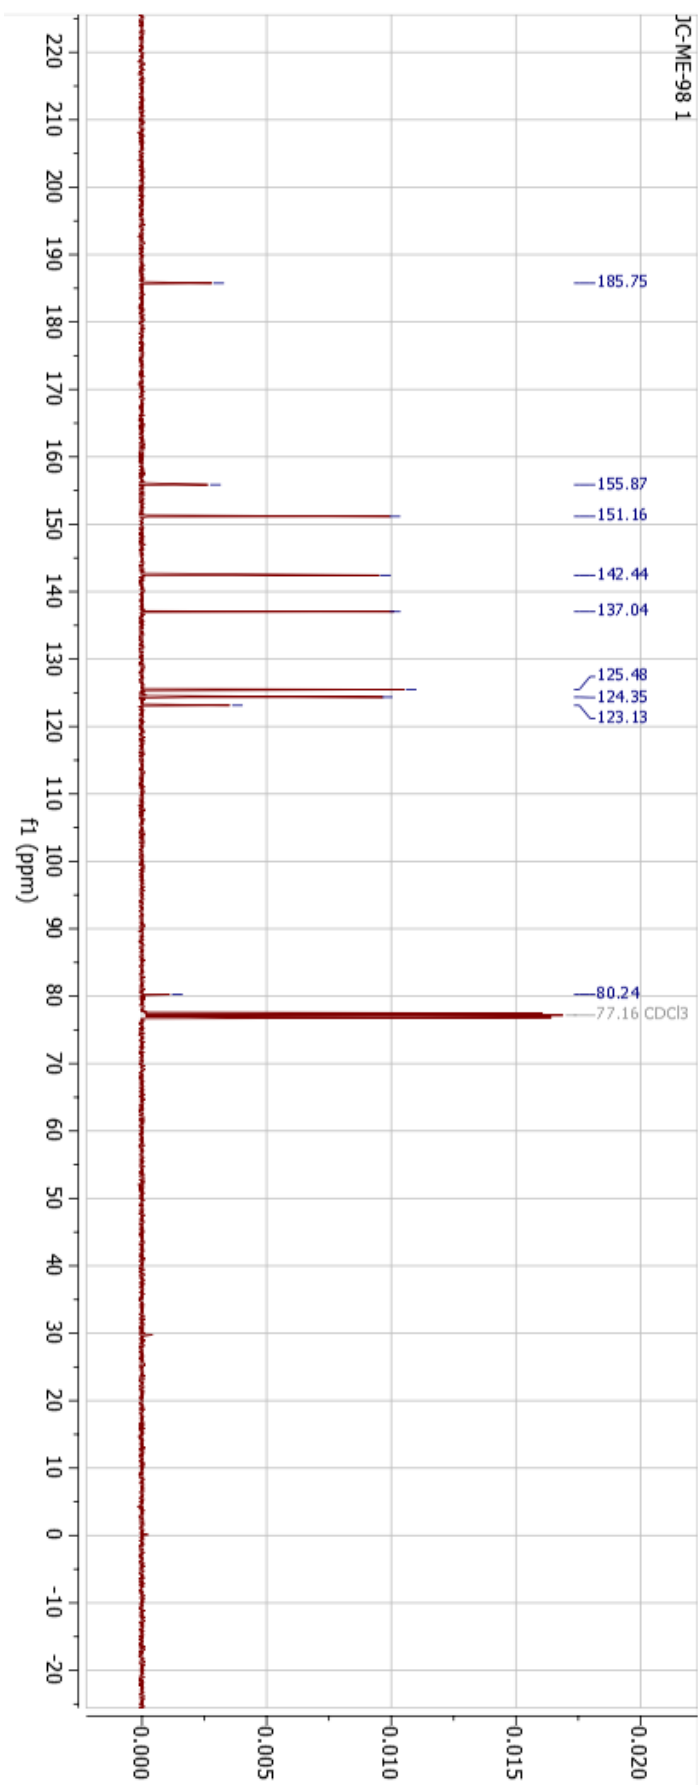

Figure S60.  $^{13}\text{C}$  NMR of Product 19.

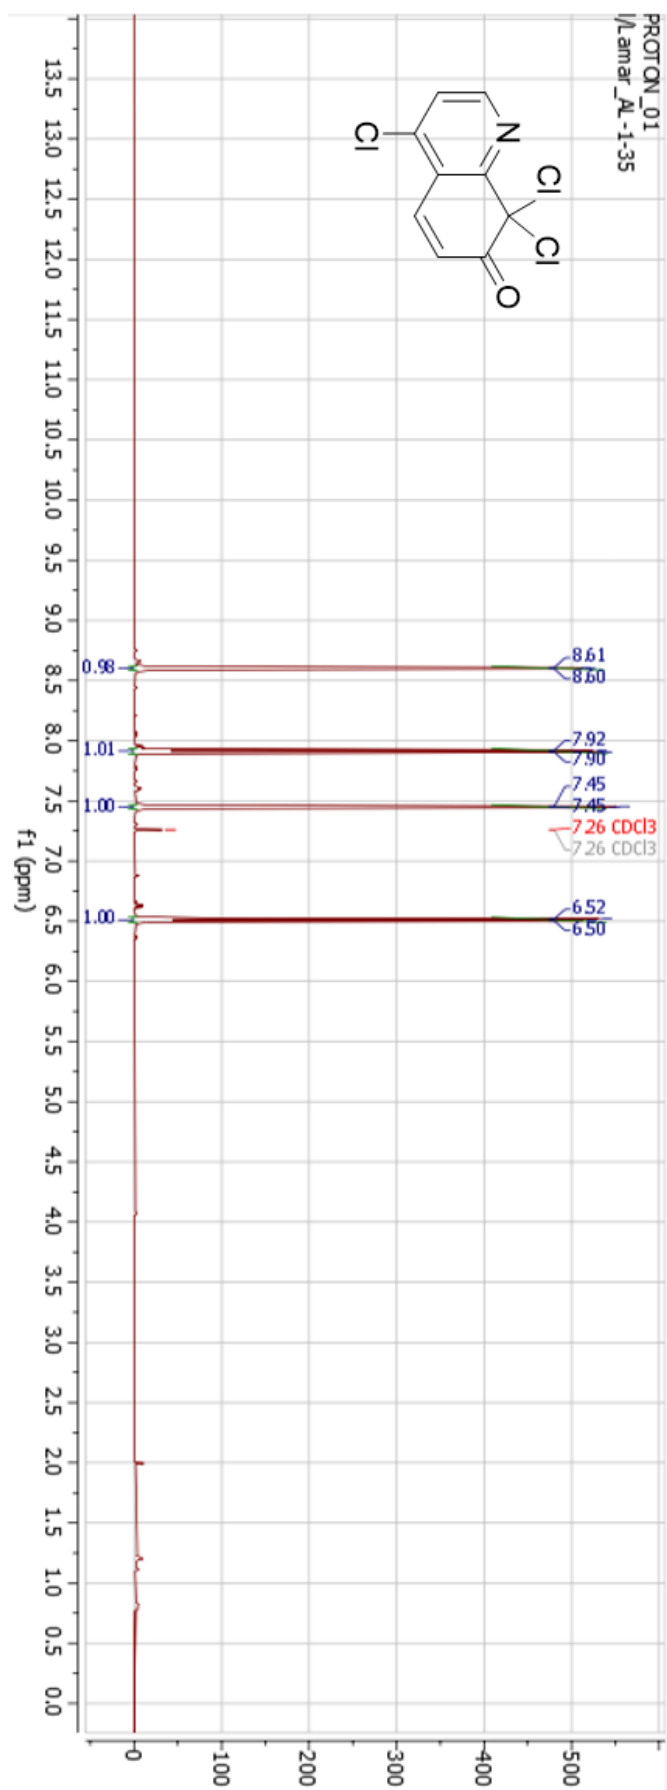

Figure S61. <sup>1</sup>H NMR of Product 20.

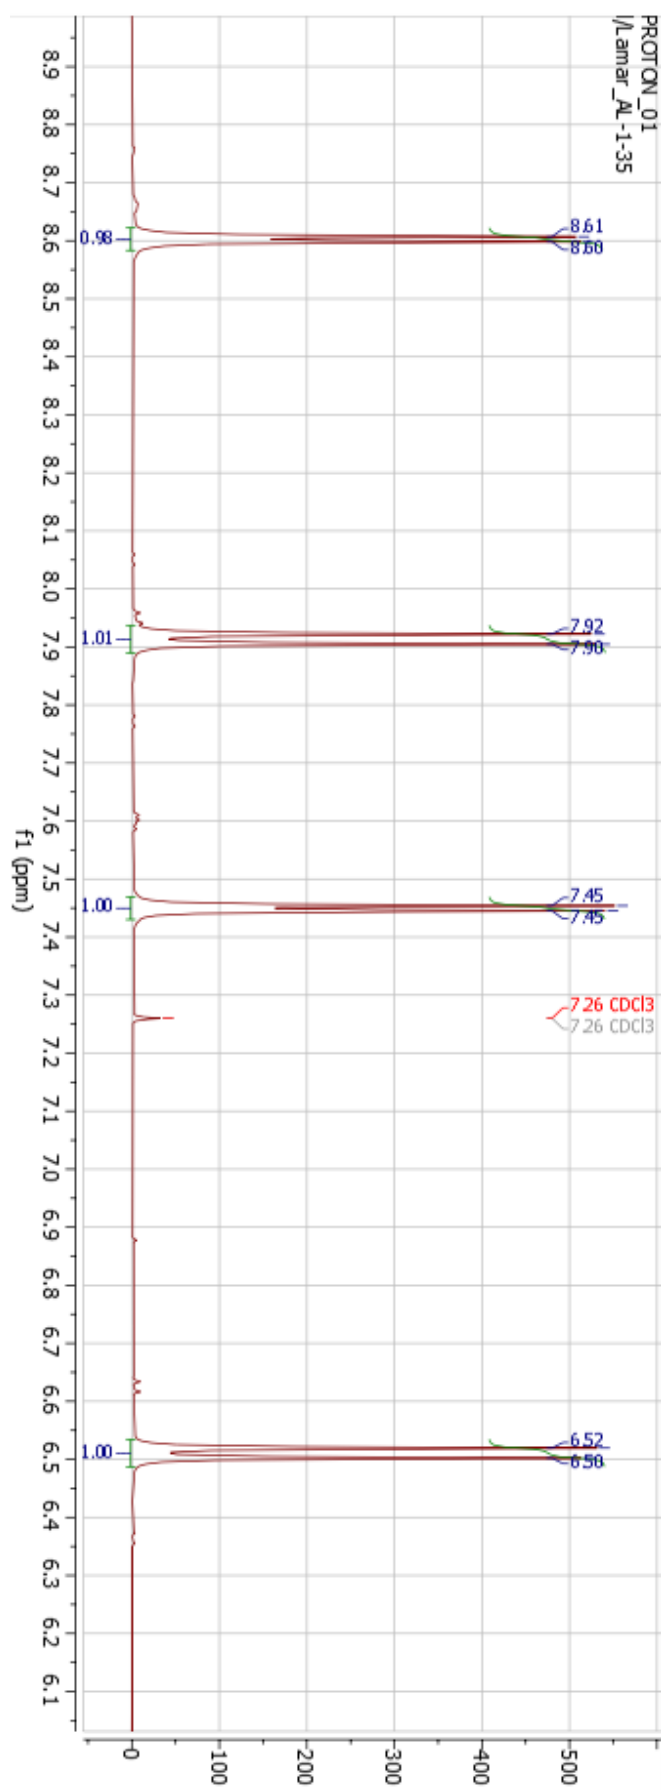

Figure S62. Zoomed in aromatic region of  $^1\text{H}$  NMR of Product **20**.

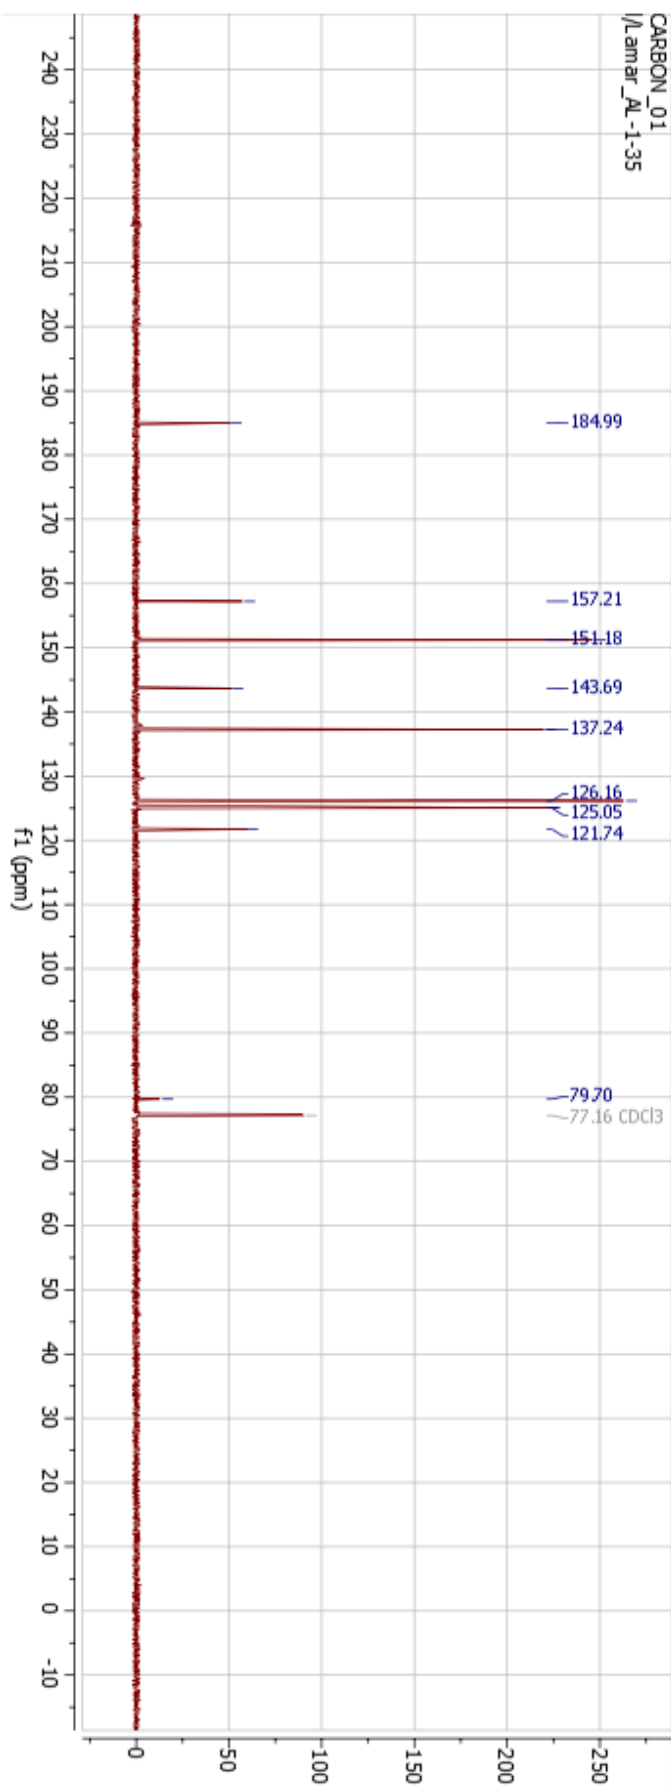

Figure S63.  $^{13}\text{C}$  NMR of Product 20.

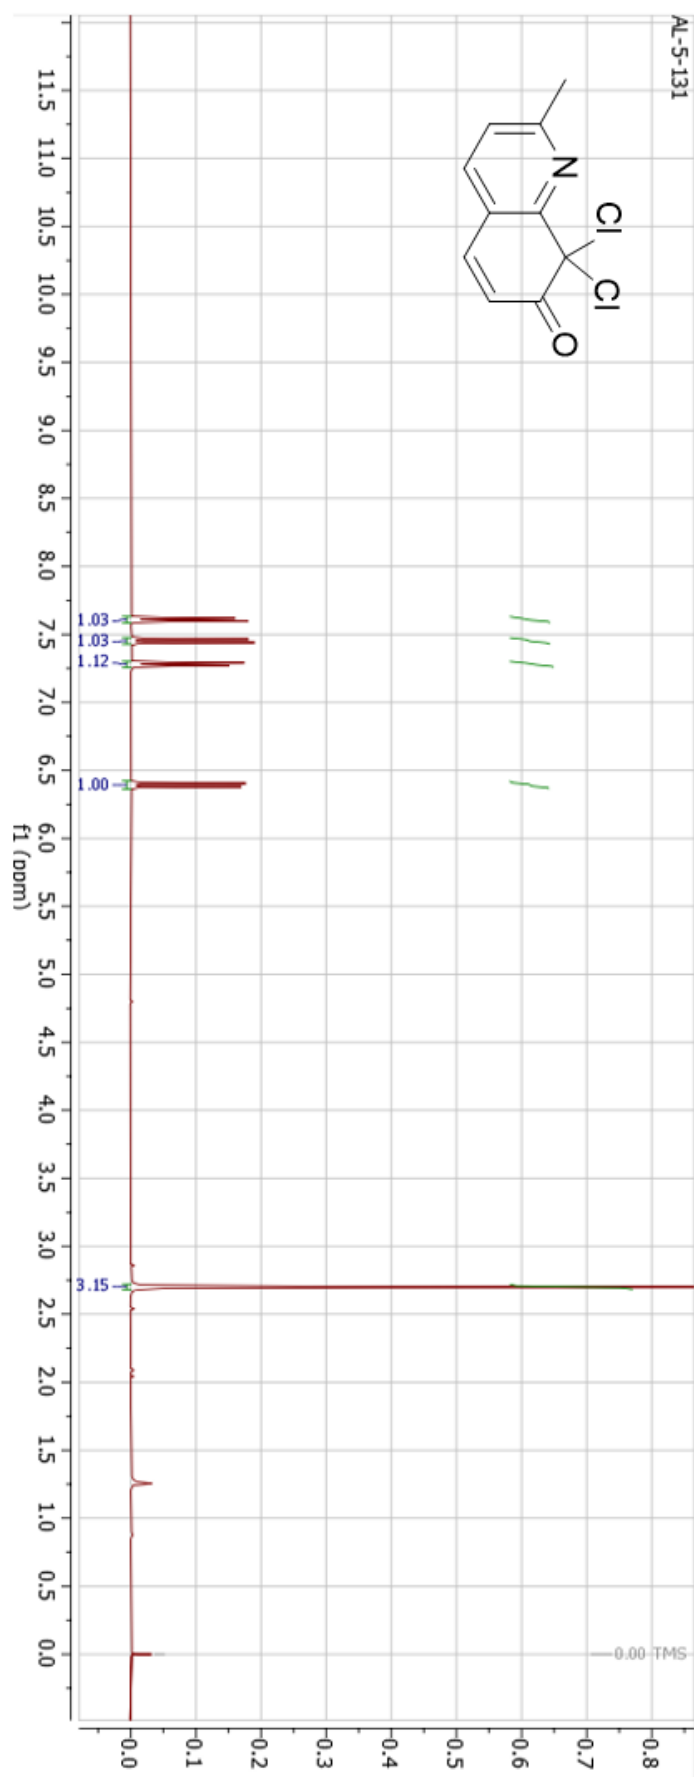

Figure S64. <sup>1</sup>H NMR of Product 21.

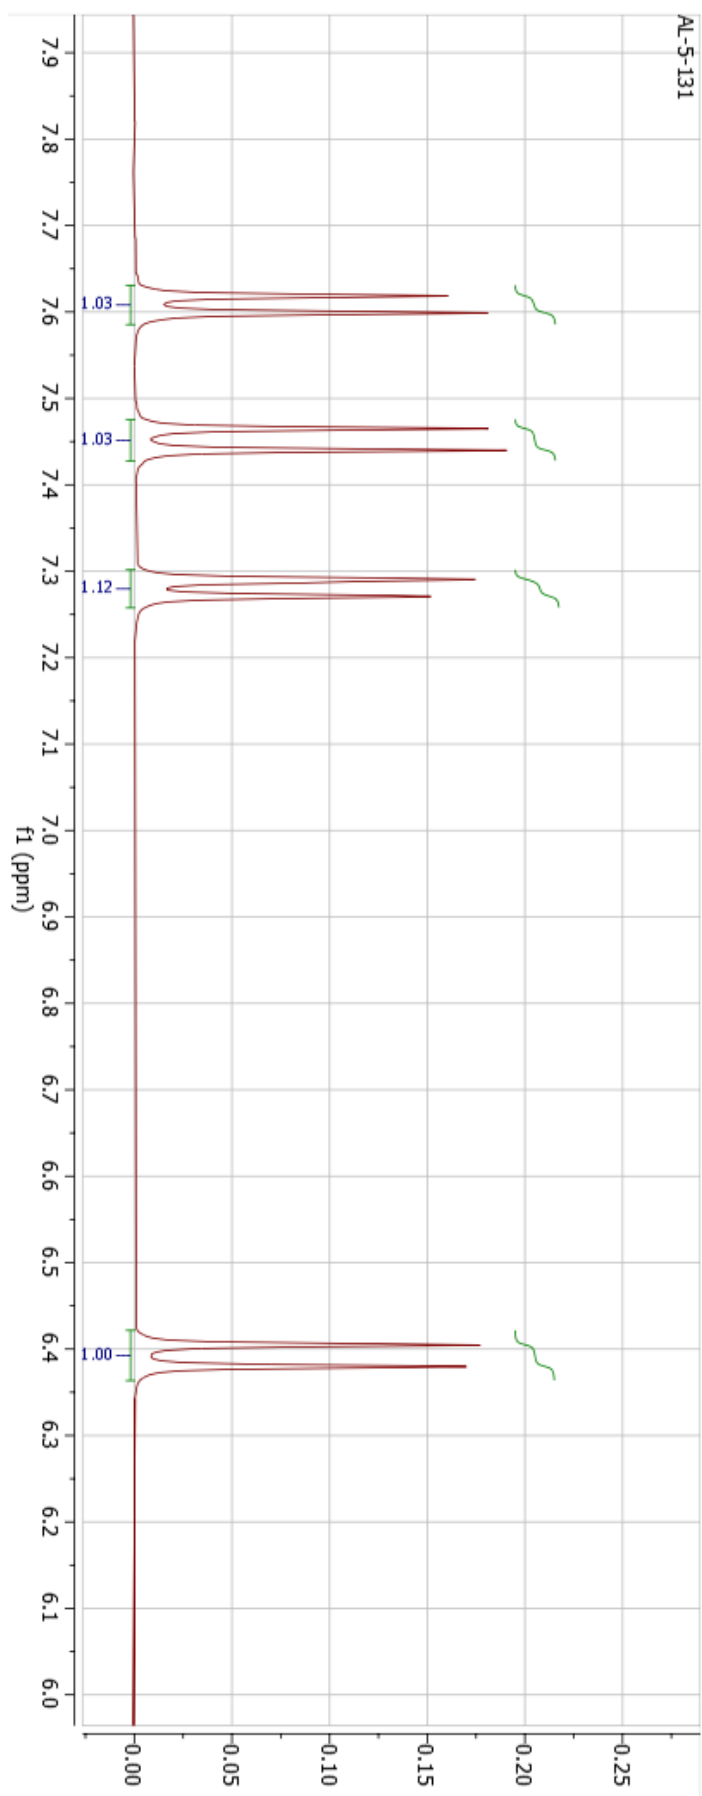

**Figure S65.** Zoomed in aromatic region of  $^1\text{H}$  NMR of Product **21**.



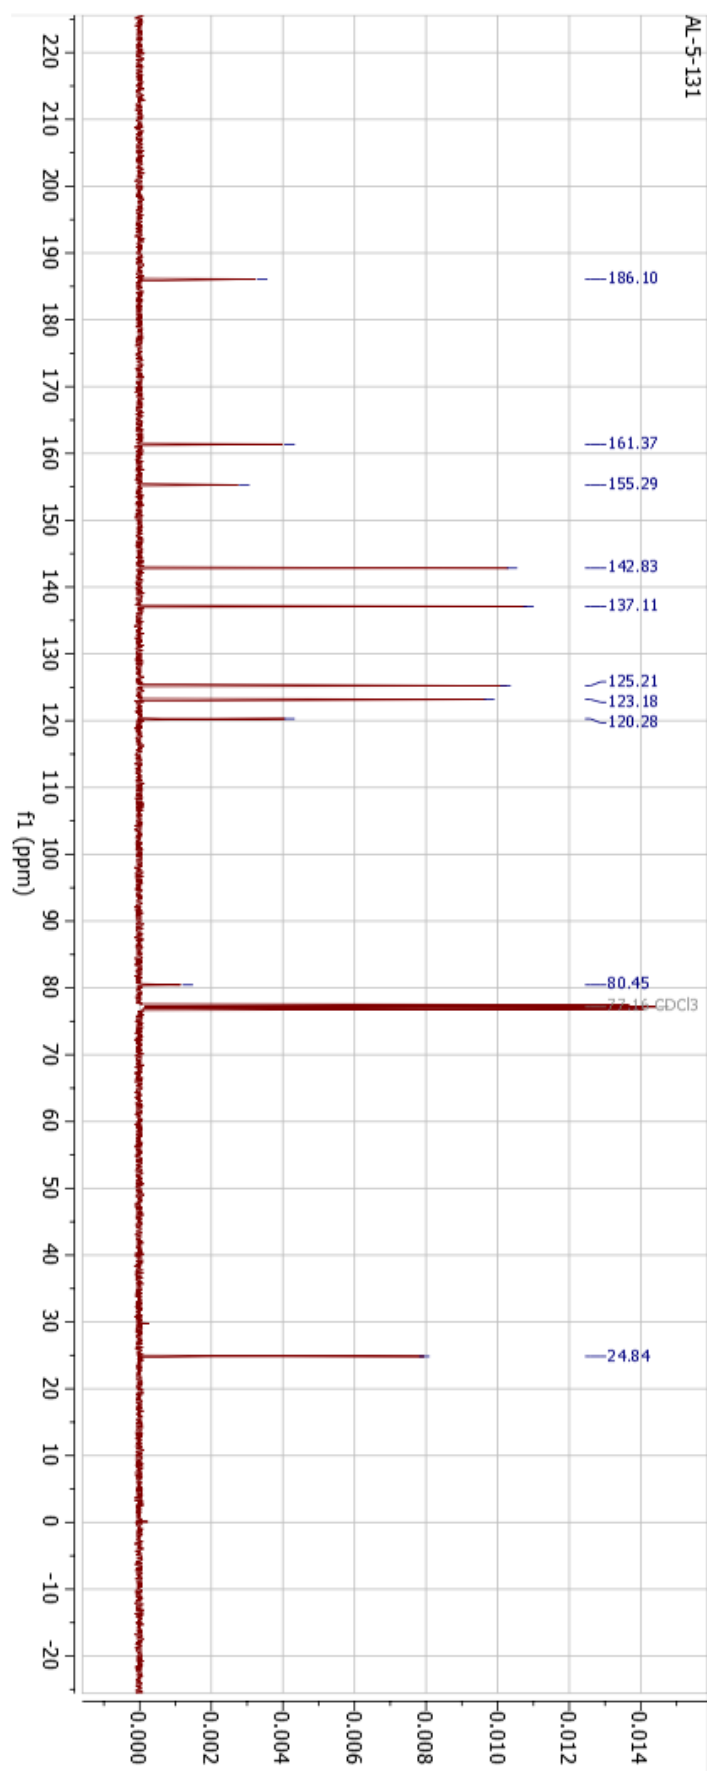

Figure S66. <sup>13</sup>C NMR of Product 21.

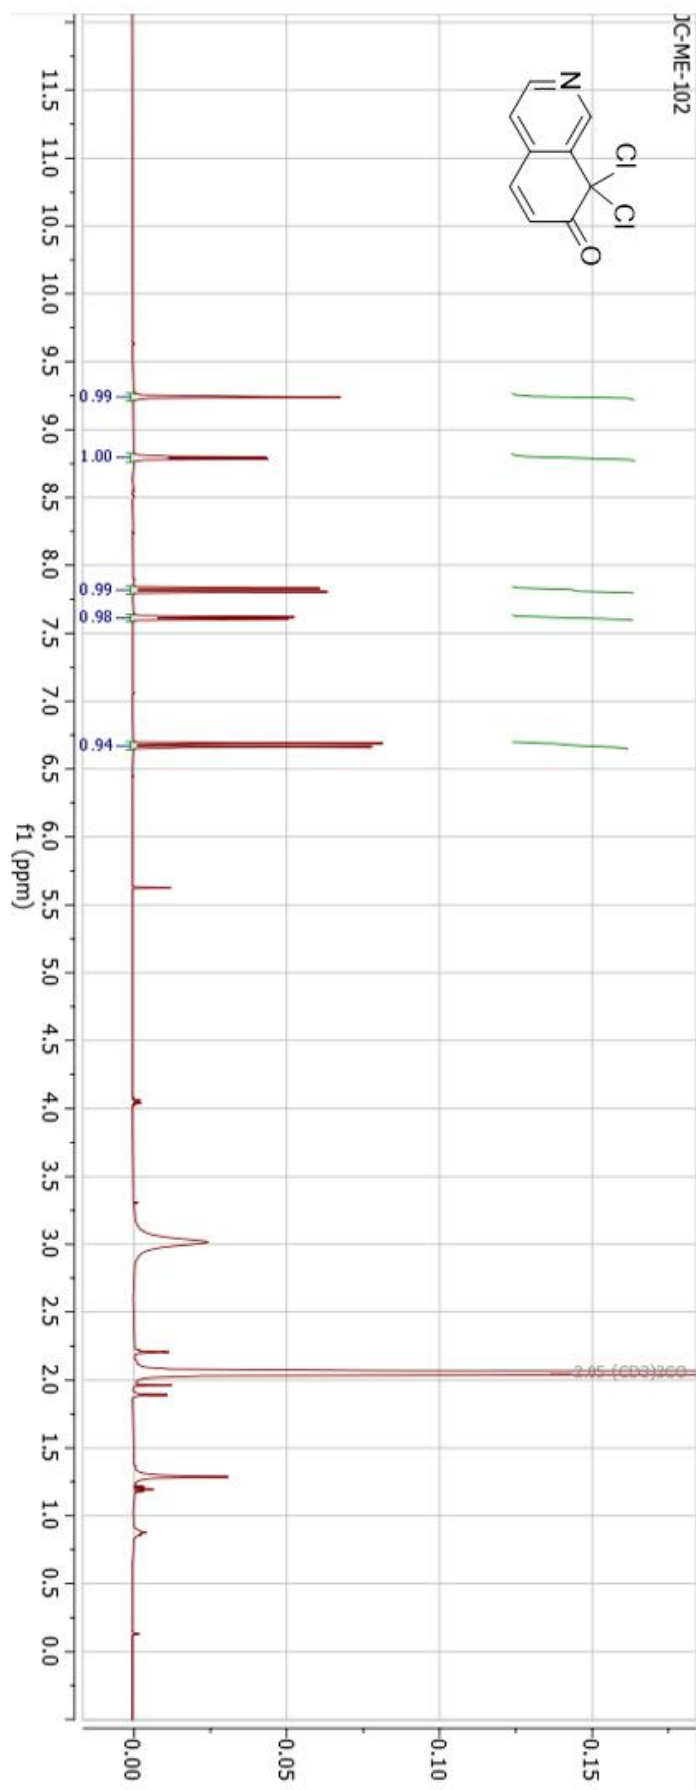

Figure S67. <sup>1</sup>H NMR of Product 22.

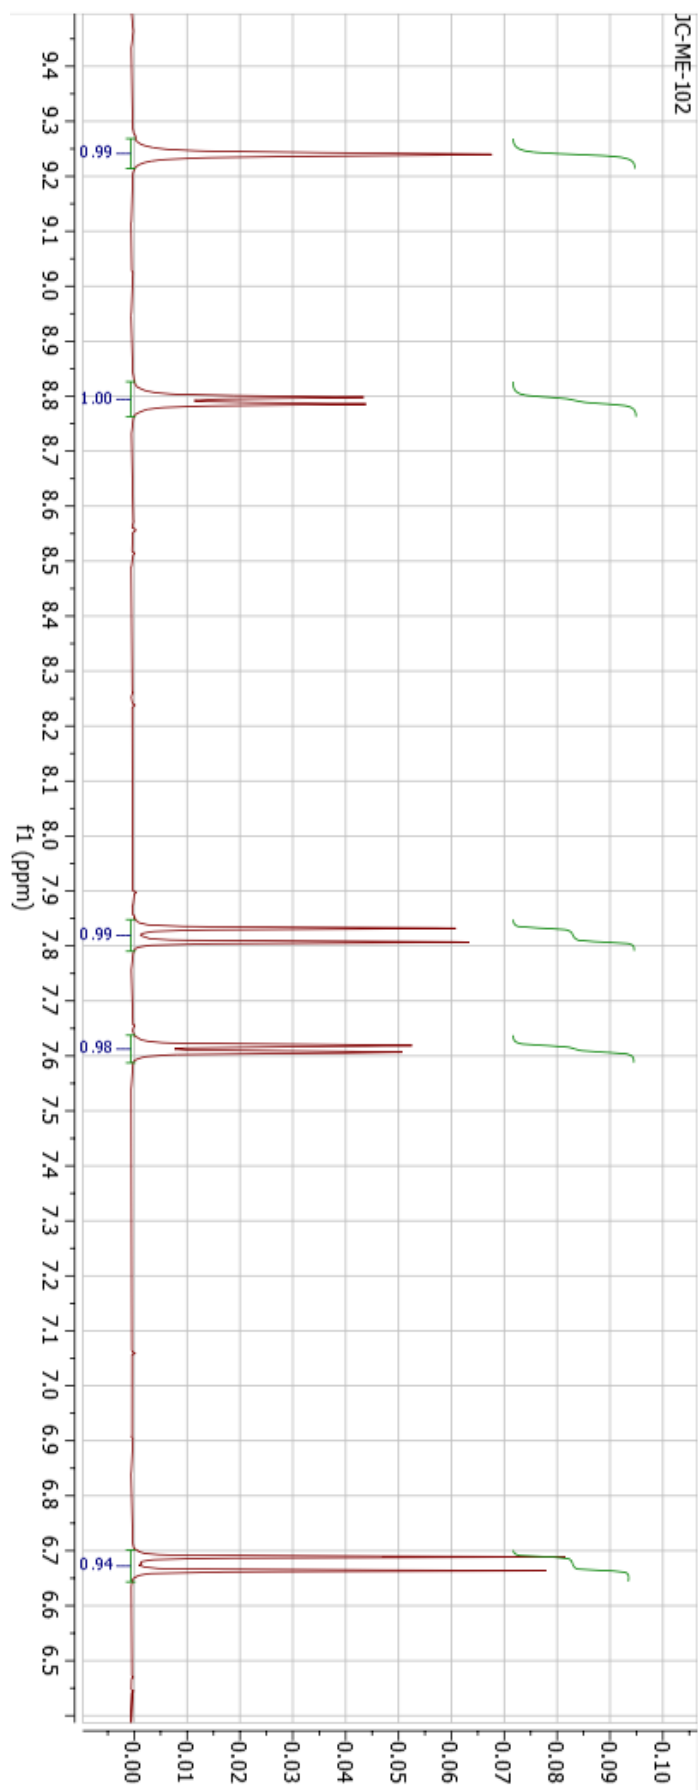

**Figure S68.** Zoomed in aromatic region of  $^1\text{H}$  NMR of Product **22**.

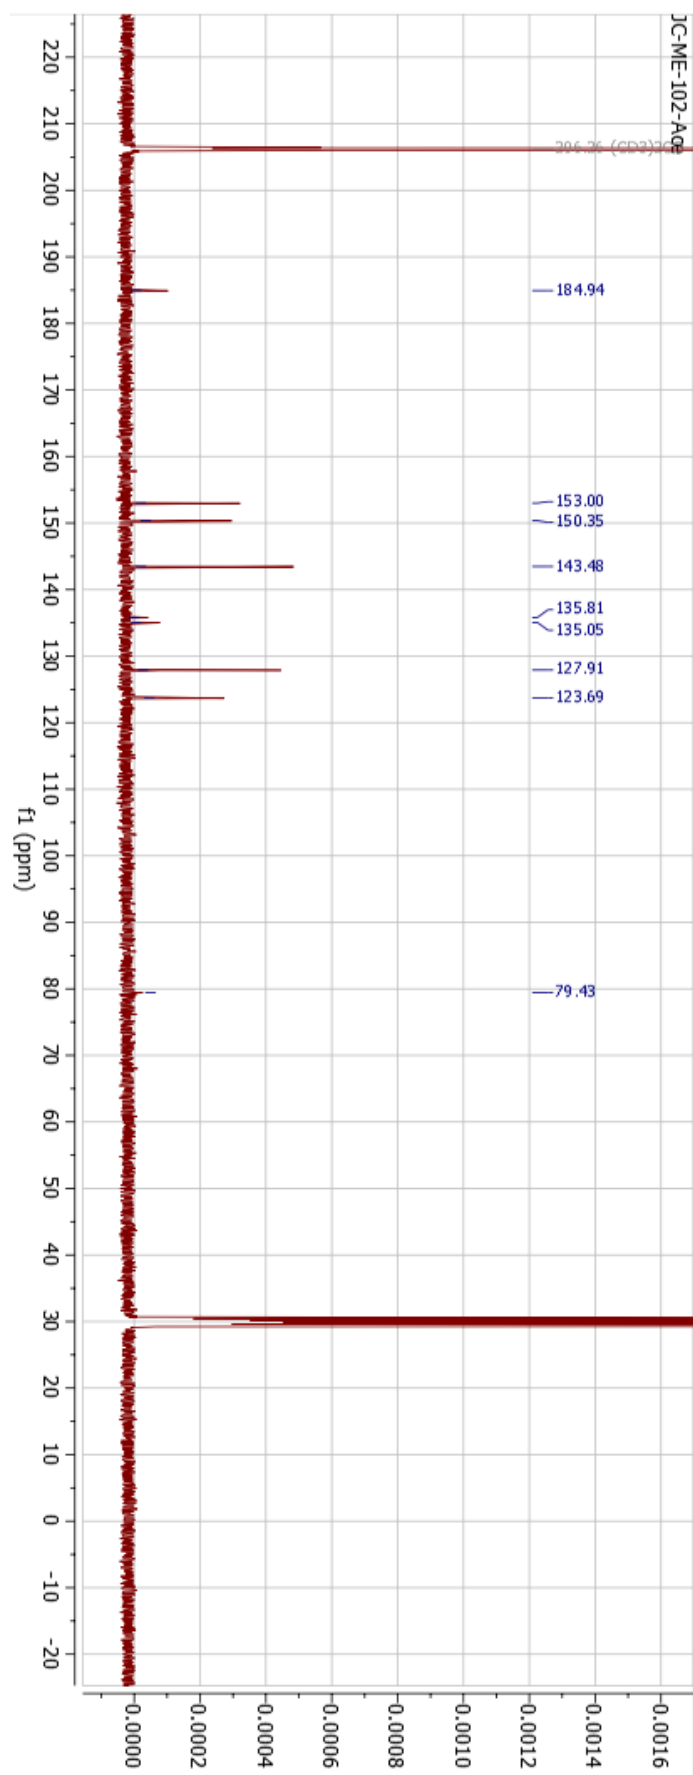

Figure S69. <sup>13</sup>C NMR of Product 22.

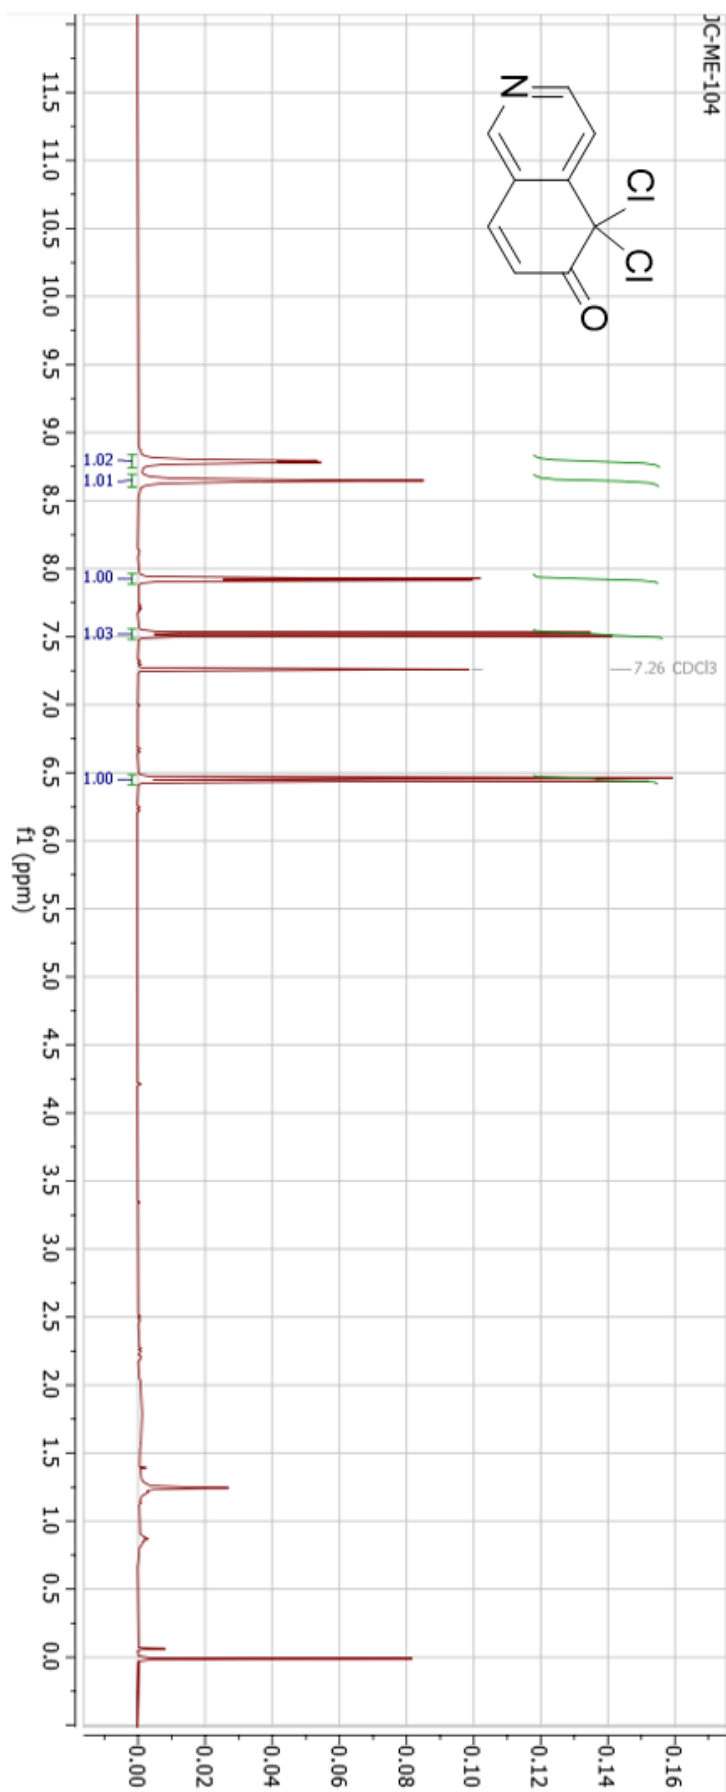

Figure S70. <sup>1</sup>H NMR of Product 23.

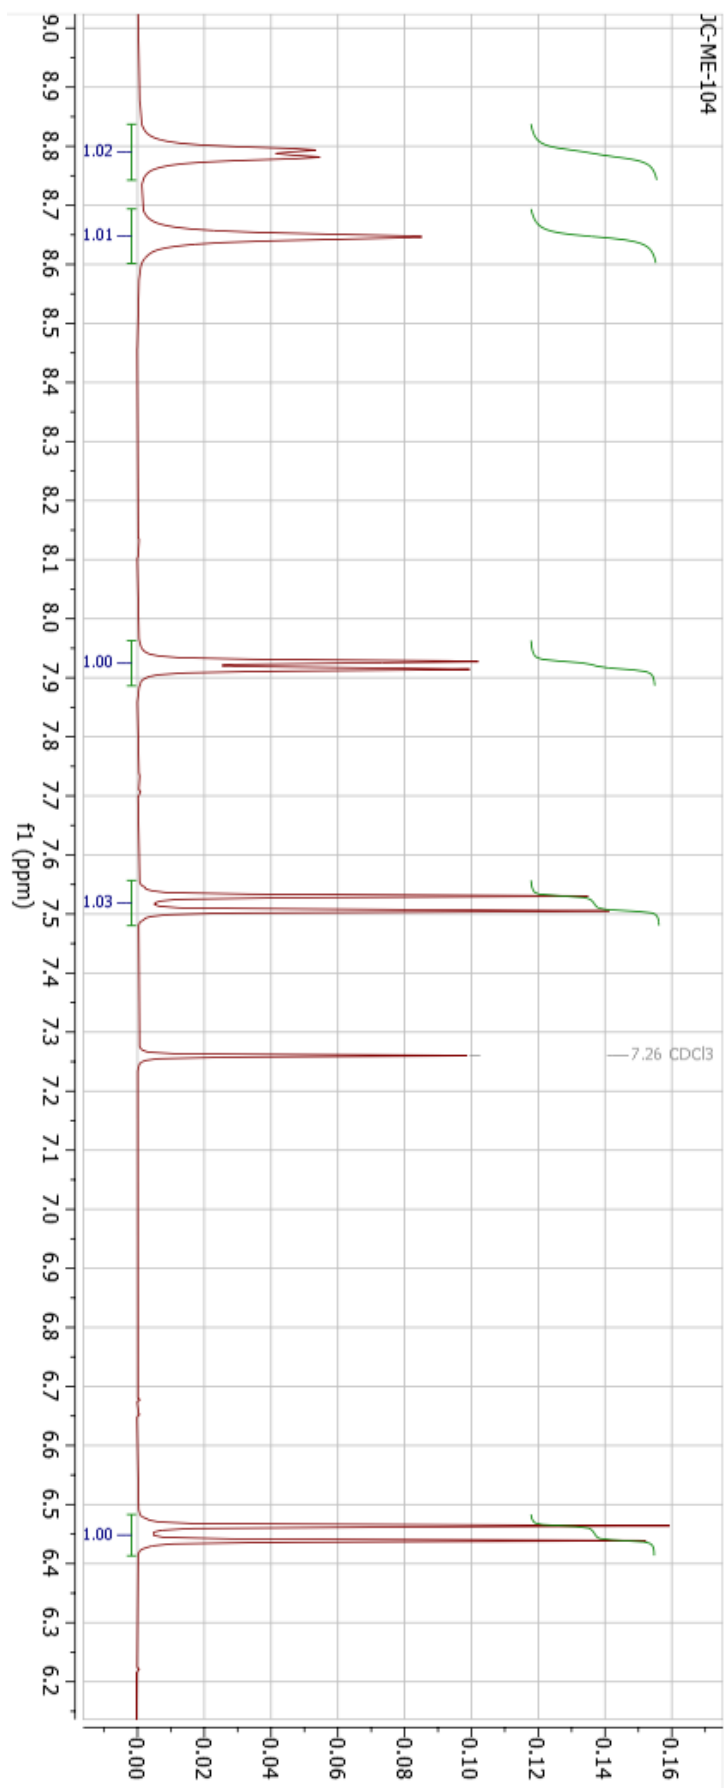

**Figure S71.** Zoomed in aromatic region of  $^1\text{H}$  NMR of Product **23**.

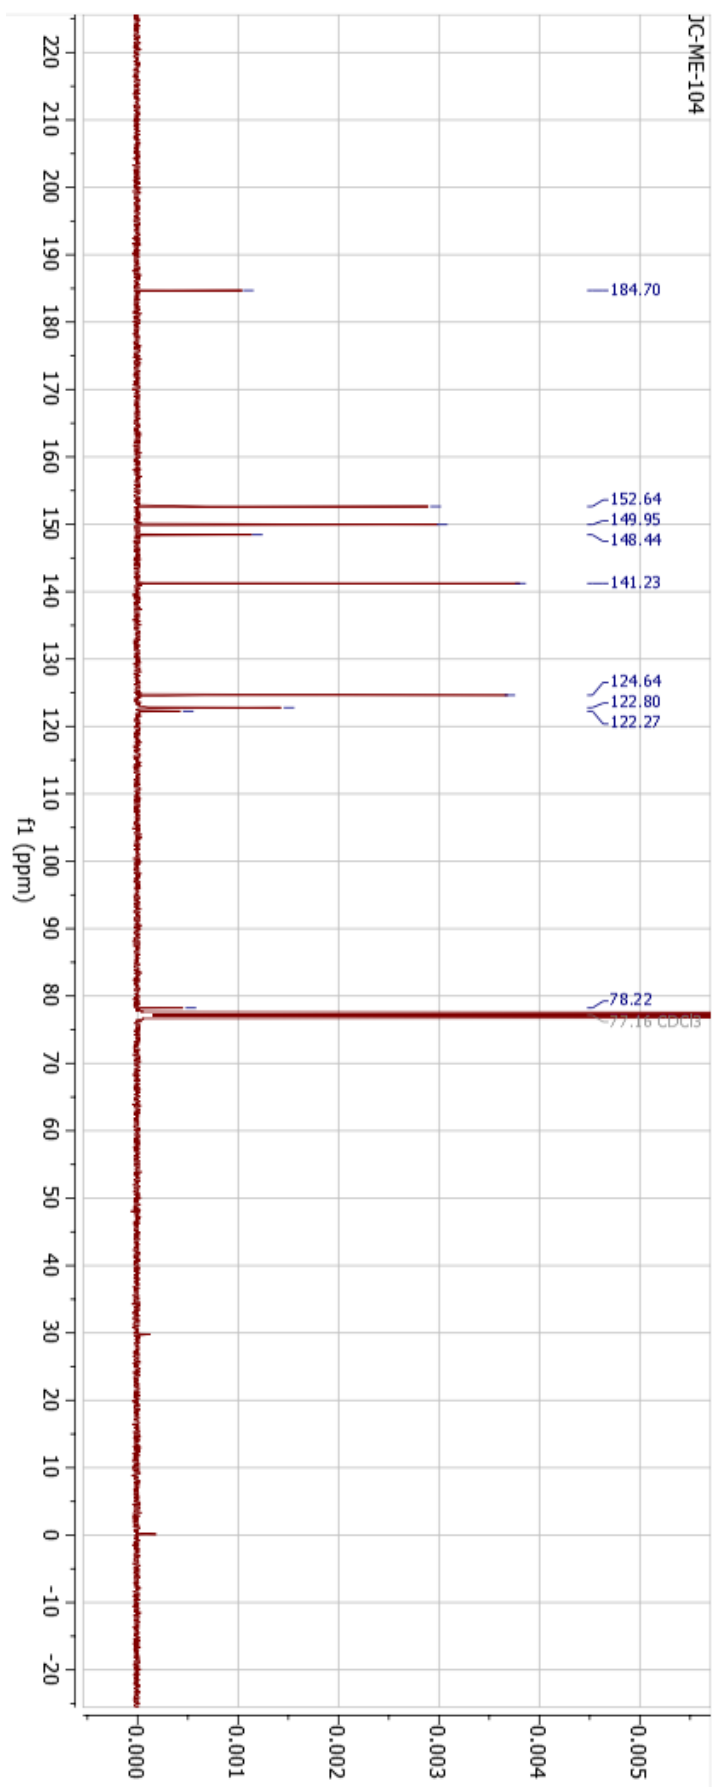

Figure S72.  $^{13}\text{C}$  NMR of Product 23.

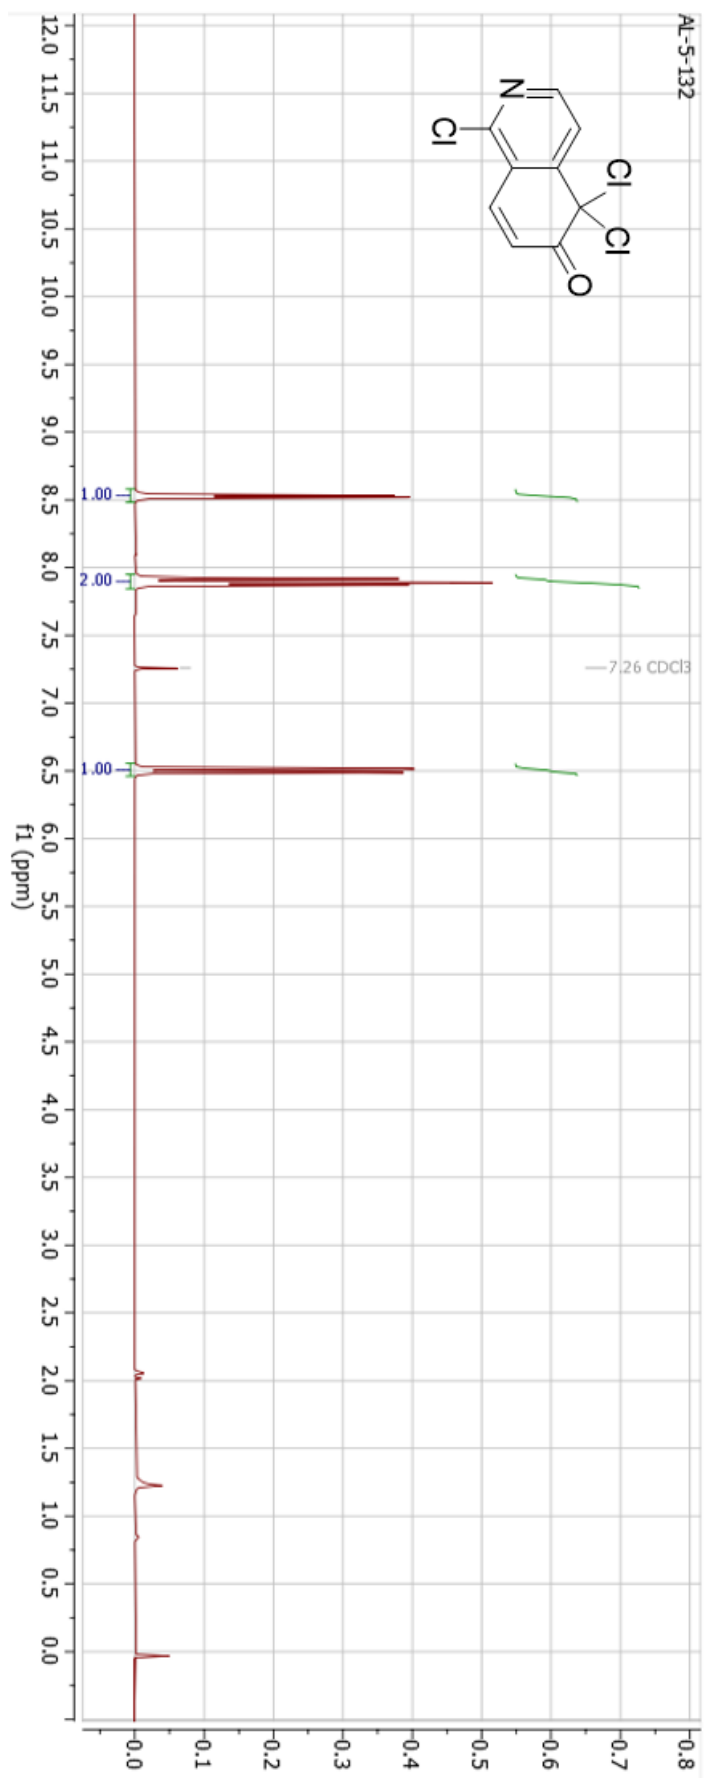

Figure S73. <sup>1</sup>H NMR of Product 24.



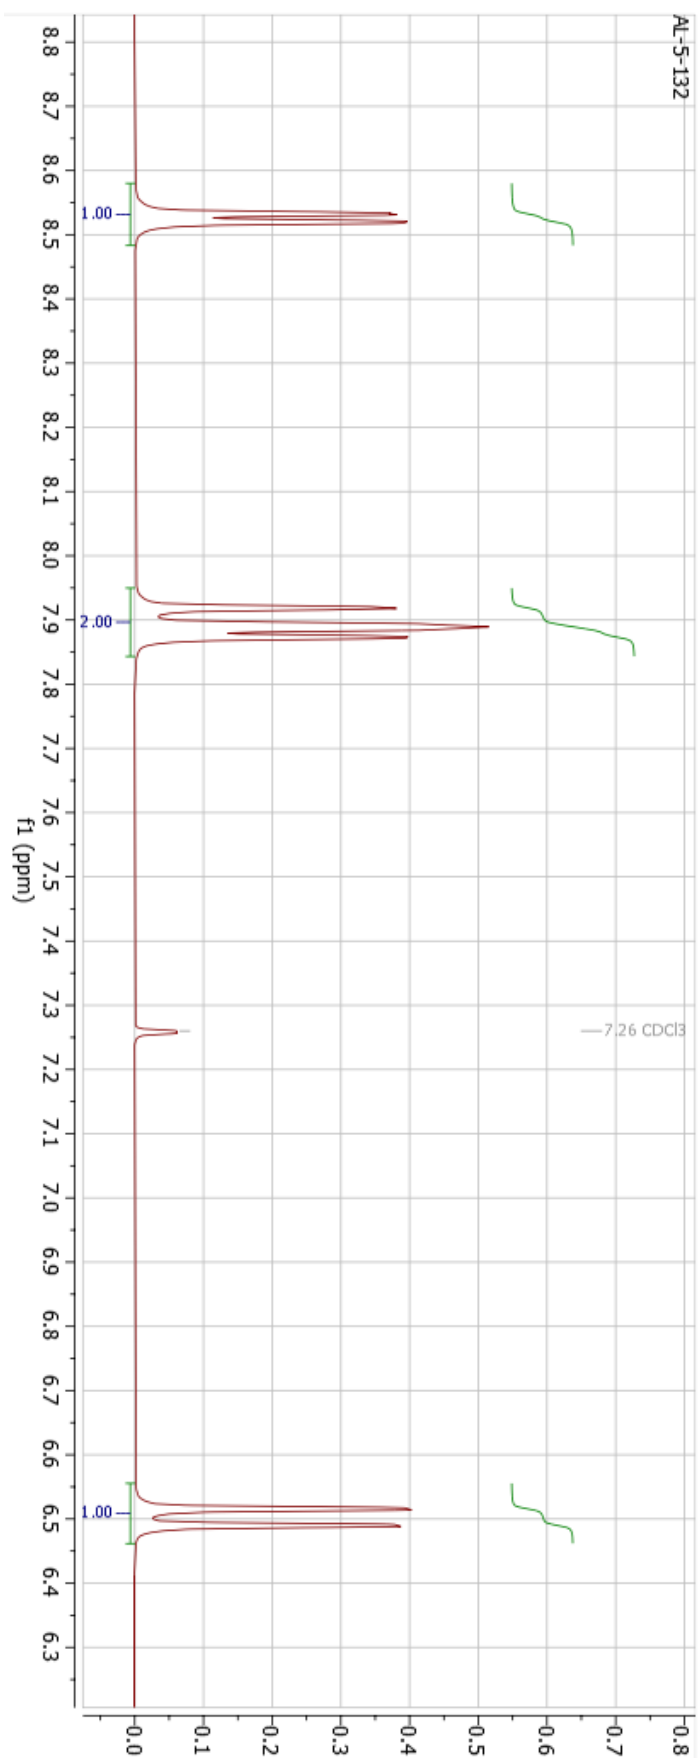

**Figure S74.** Zoomed in aromatic region of  $^1\text{H}$  NMR of Product 24.

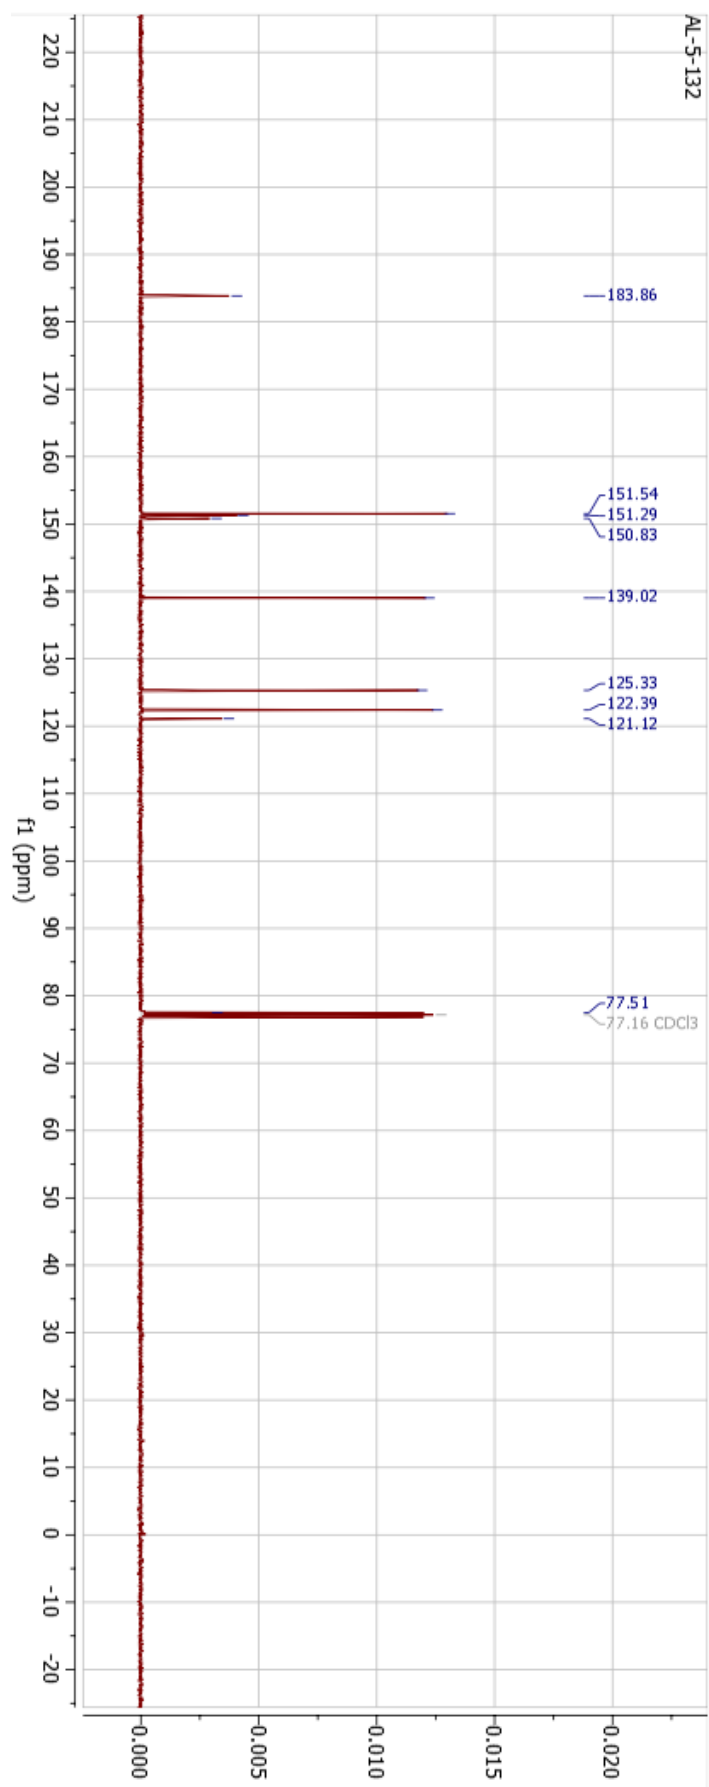

Figure S75.  $^{13}\text{C}$  NMR of Product 24.

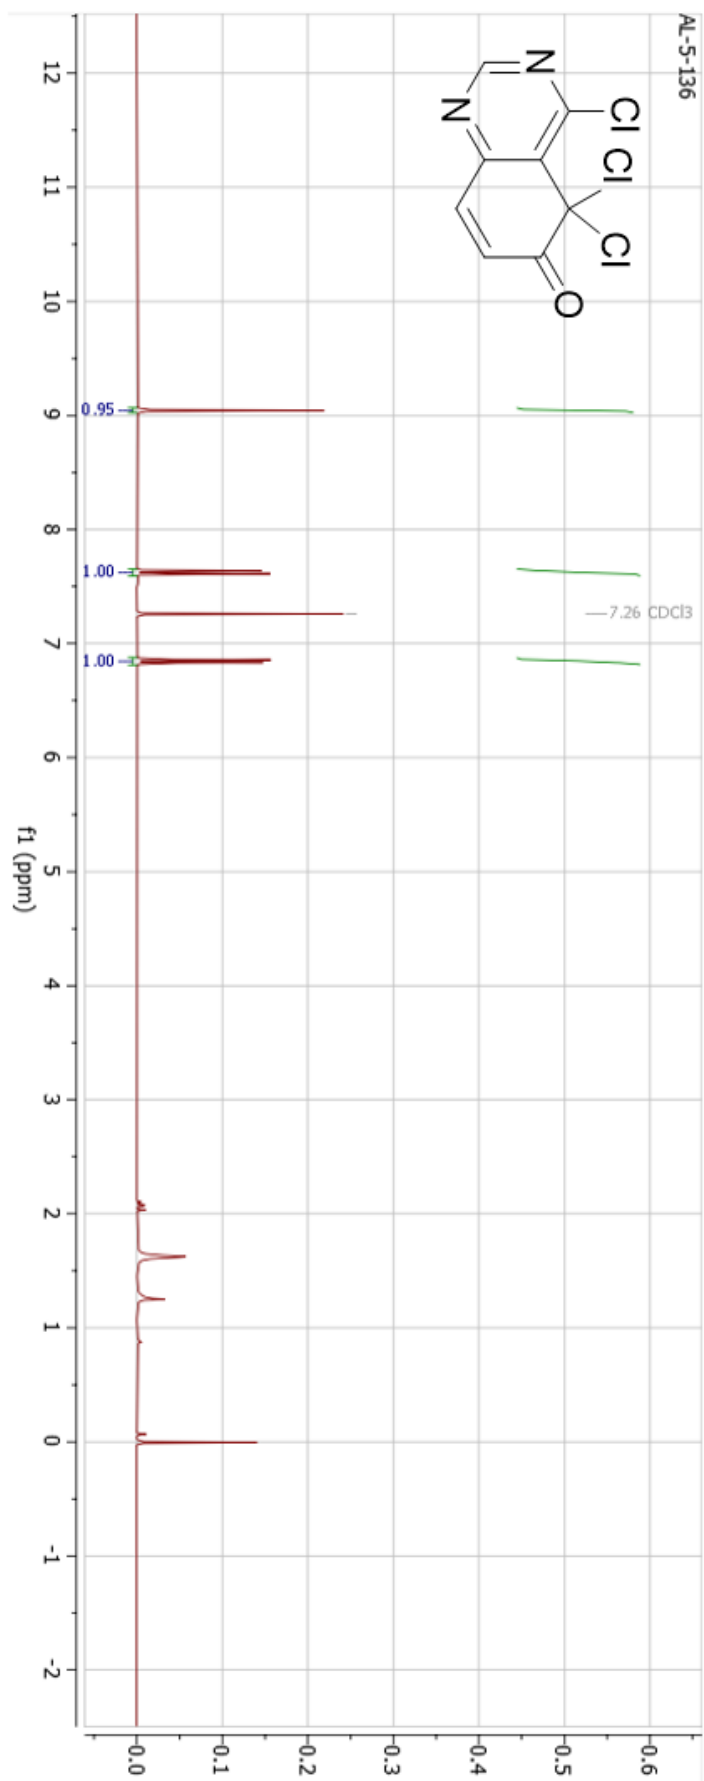

Figure S76. <sup>1</sup>H NMR of Product 25.

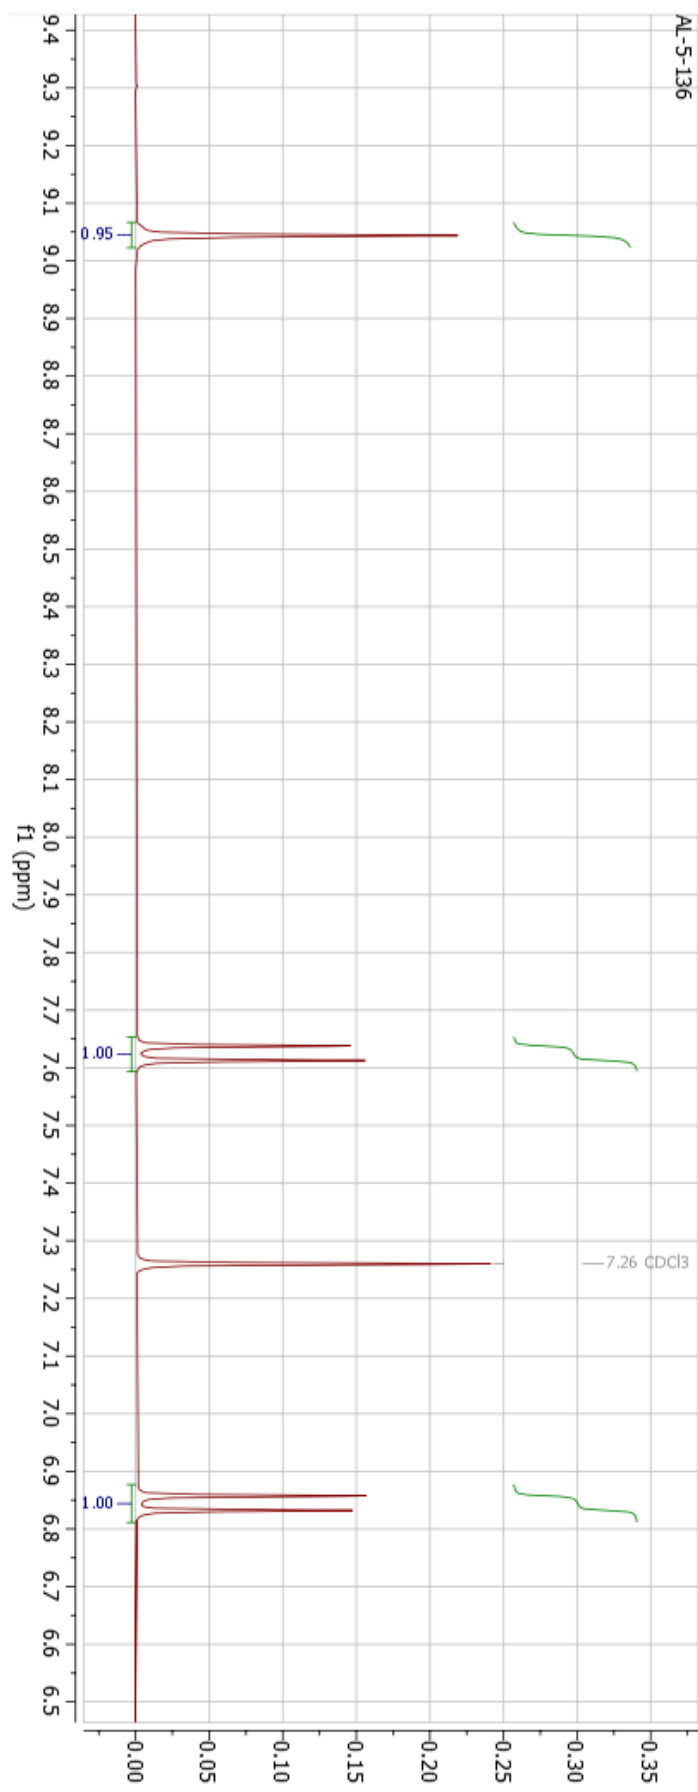

**Figure S77.** Zoomed in aromatic region of  $^1\text{H}$  NMR of Product **25**.

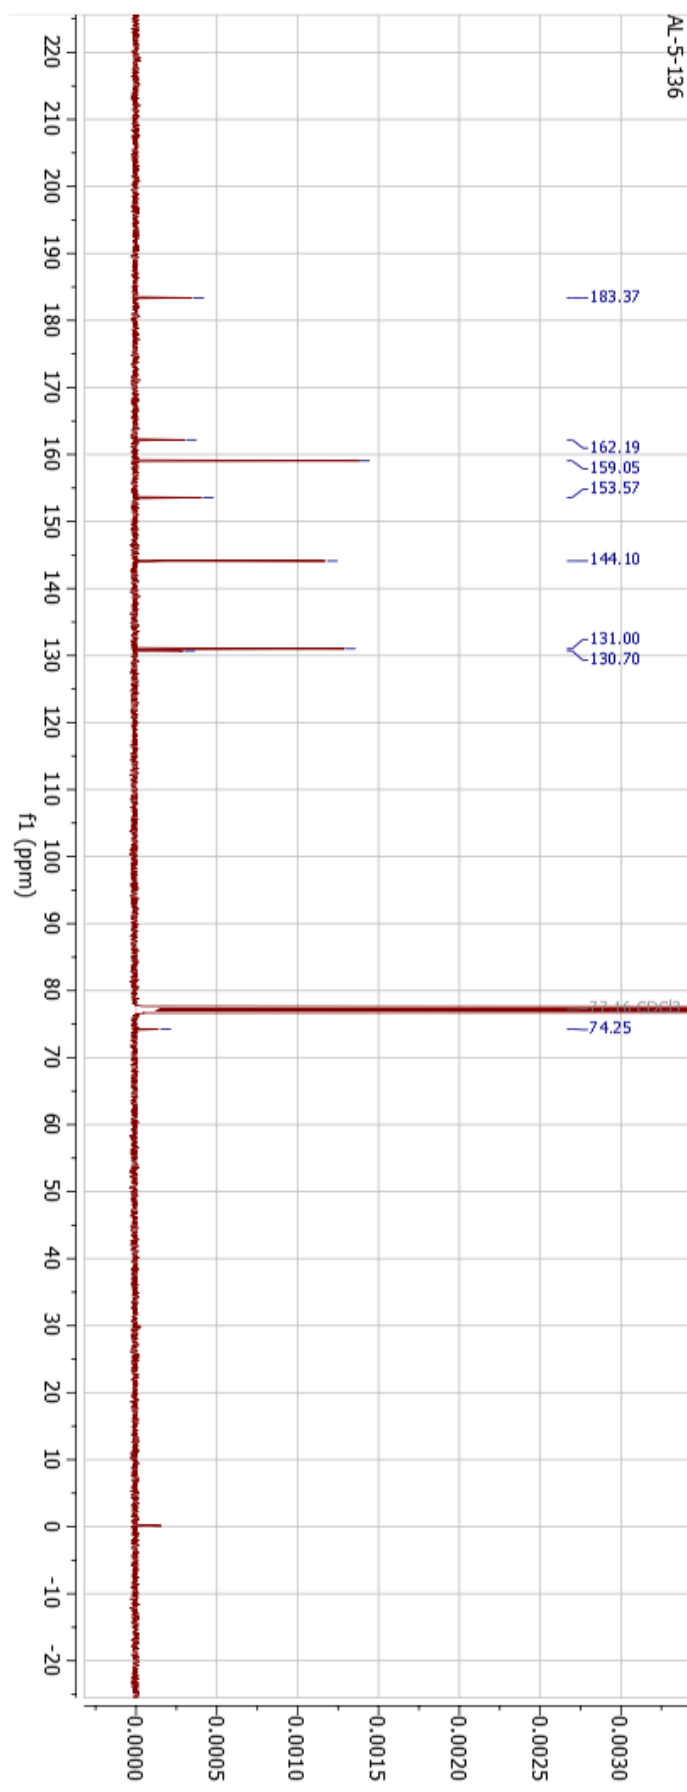

Figure S78.  $^{13}\text{C}$  NMR of Product 25.

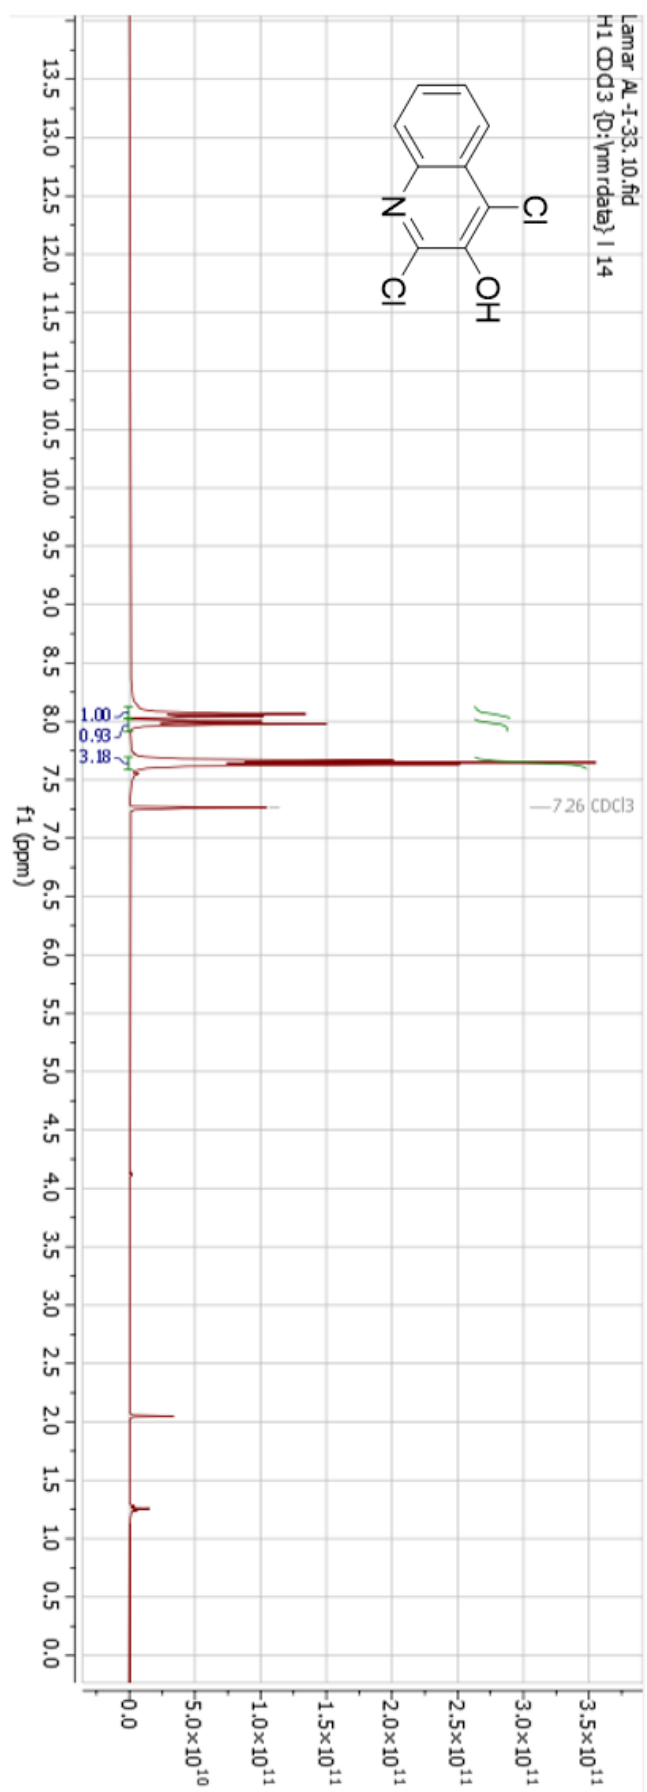

Figure S79. <sup>1</sup>H NMR of Product 26.

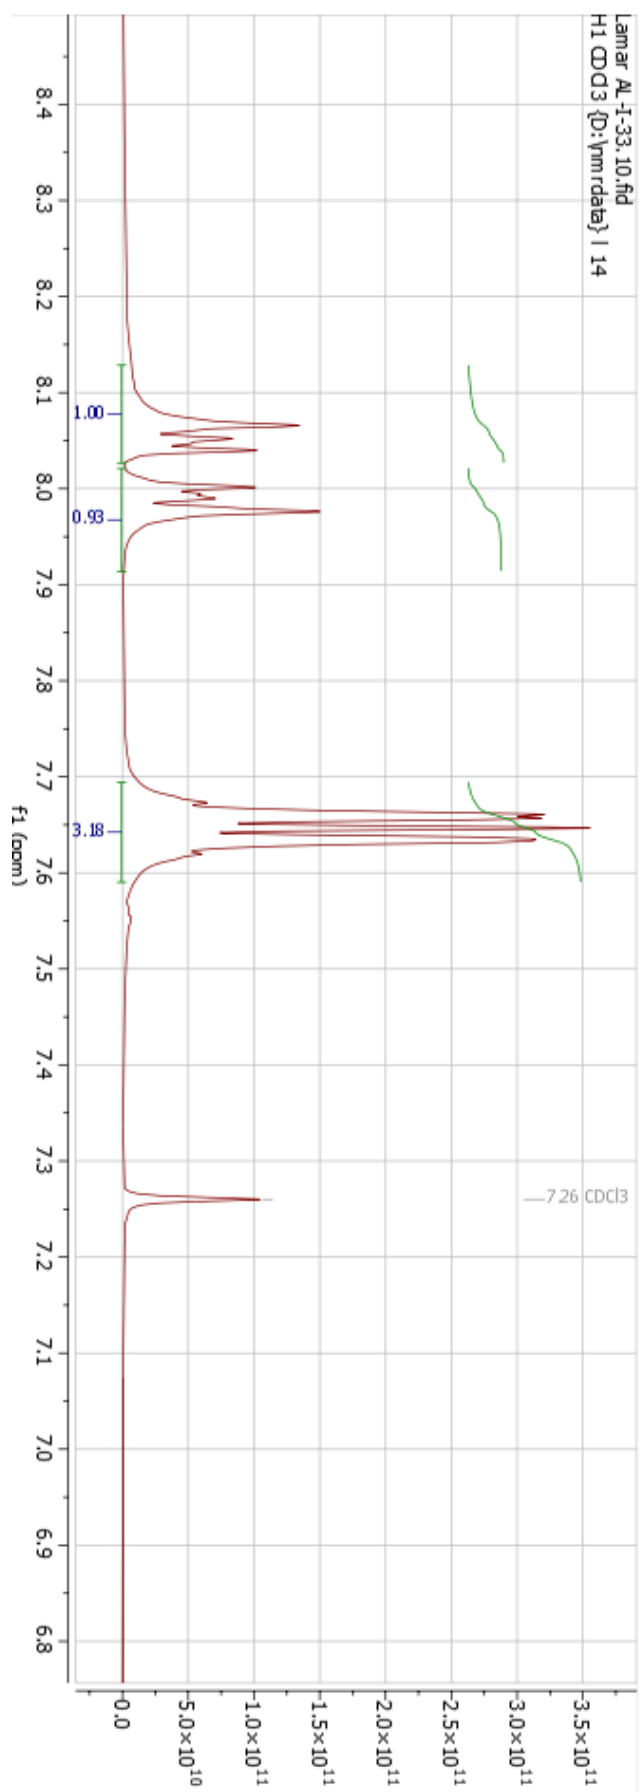

**Figure S80.** Zoomed in aromatic region of  $^1\text{H}$  NMR of Product **26**.

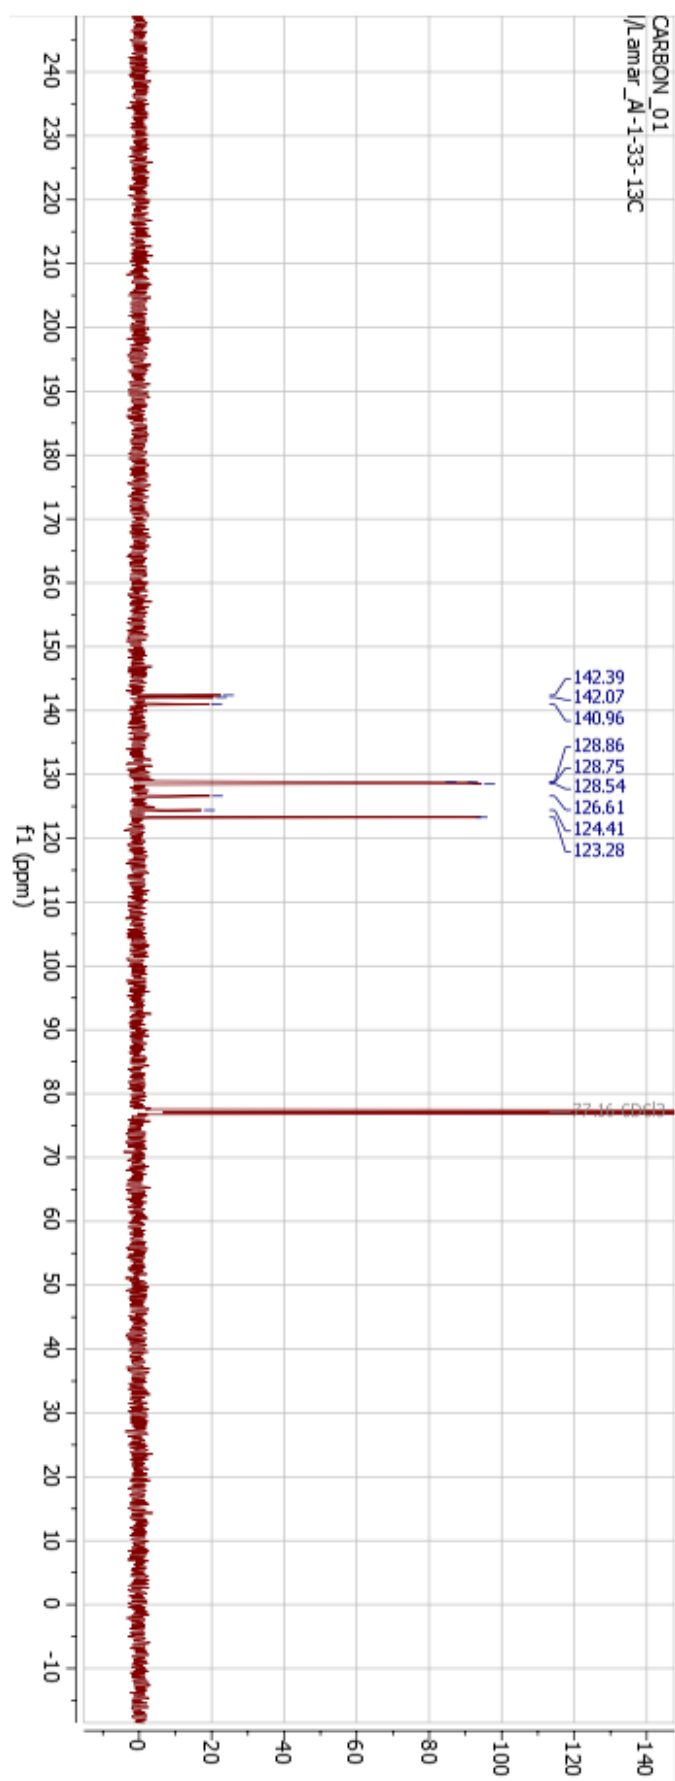

Figure S81.  $^{13}\text{C}$  NMR of Product 26.



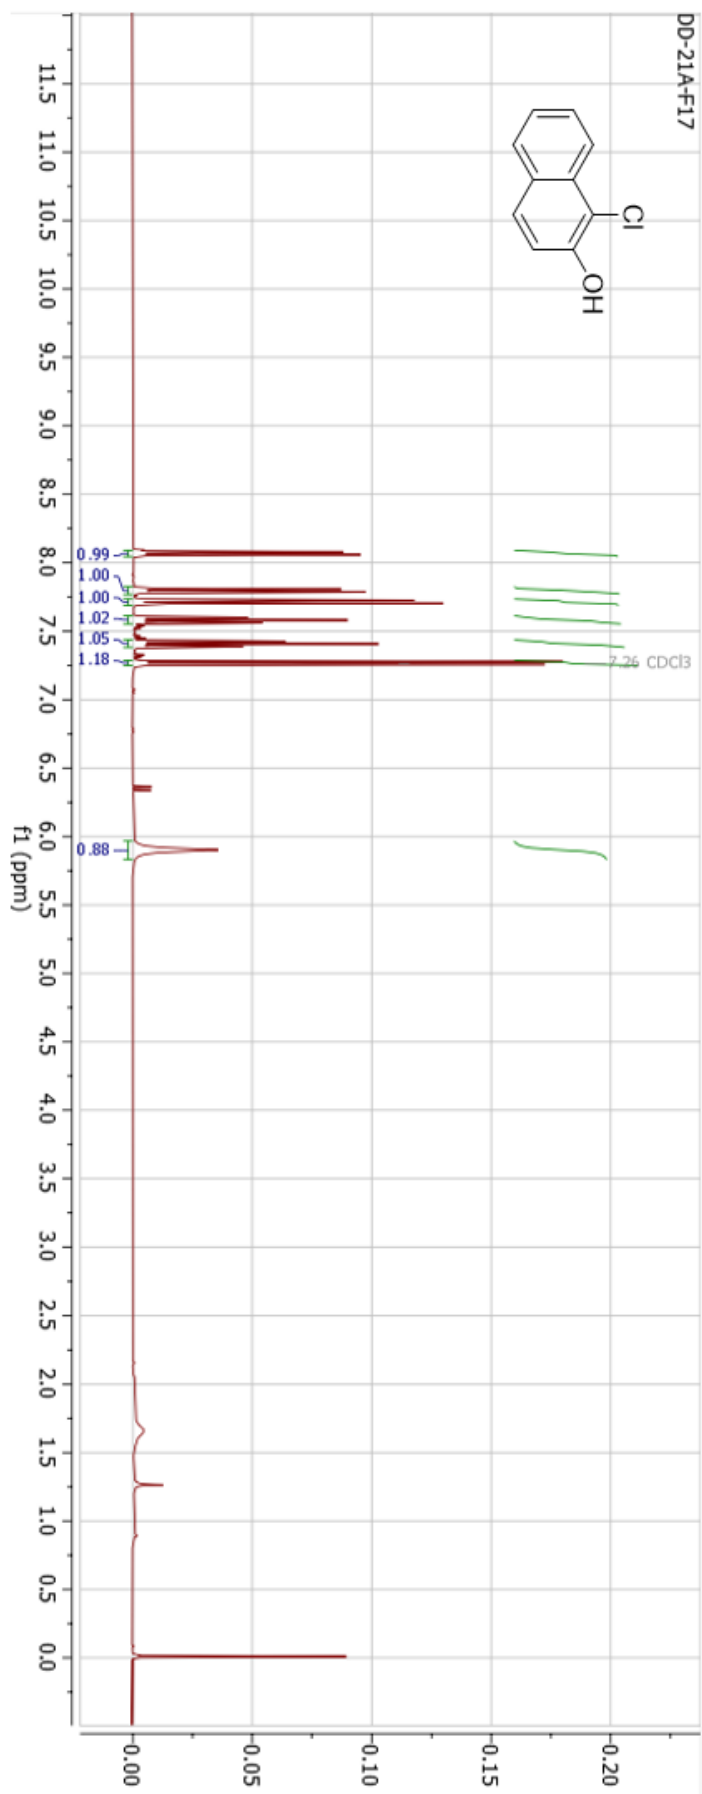

Figure S82. <sup>1</sup>H NMR of Product 27.

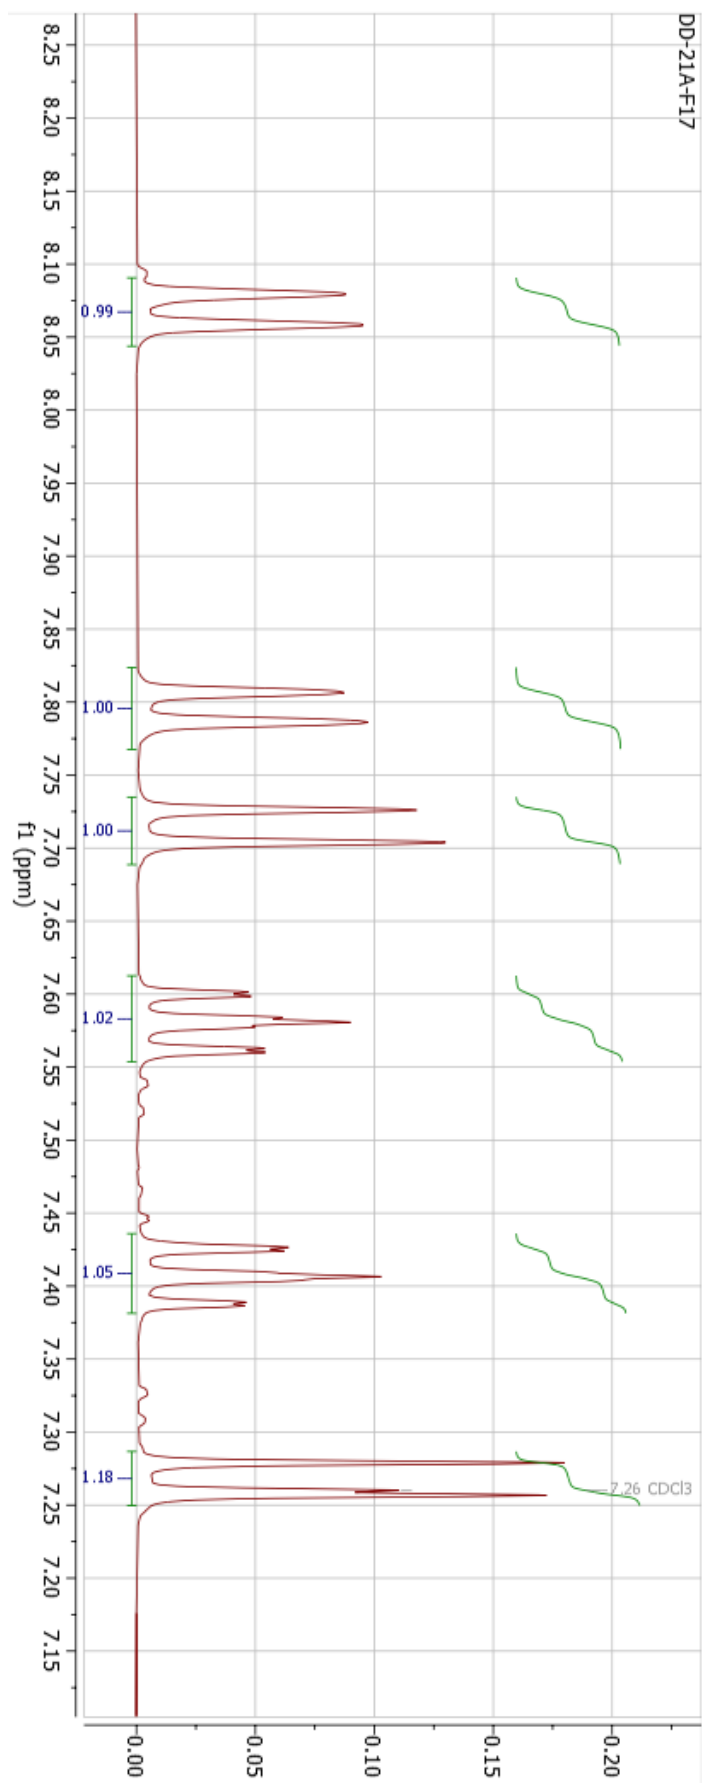

Figure S83. Zoomed in aromatic region of  $^1\text{H}$  NMR of Product 27.

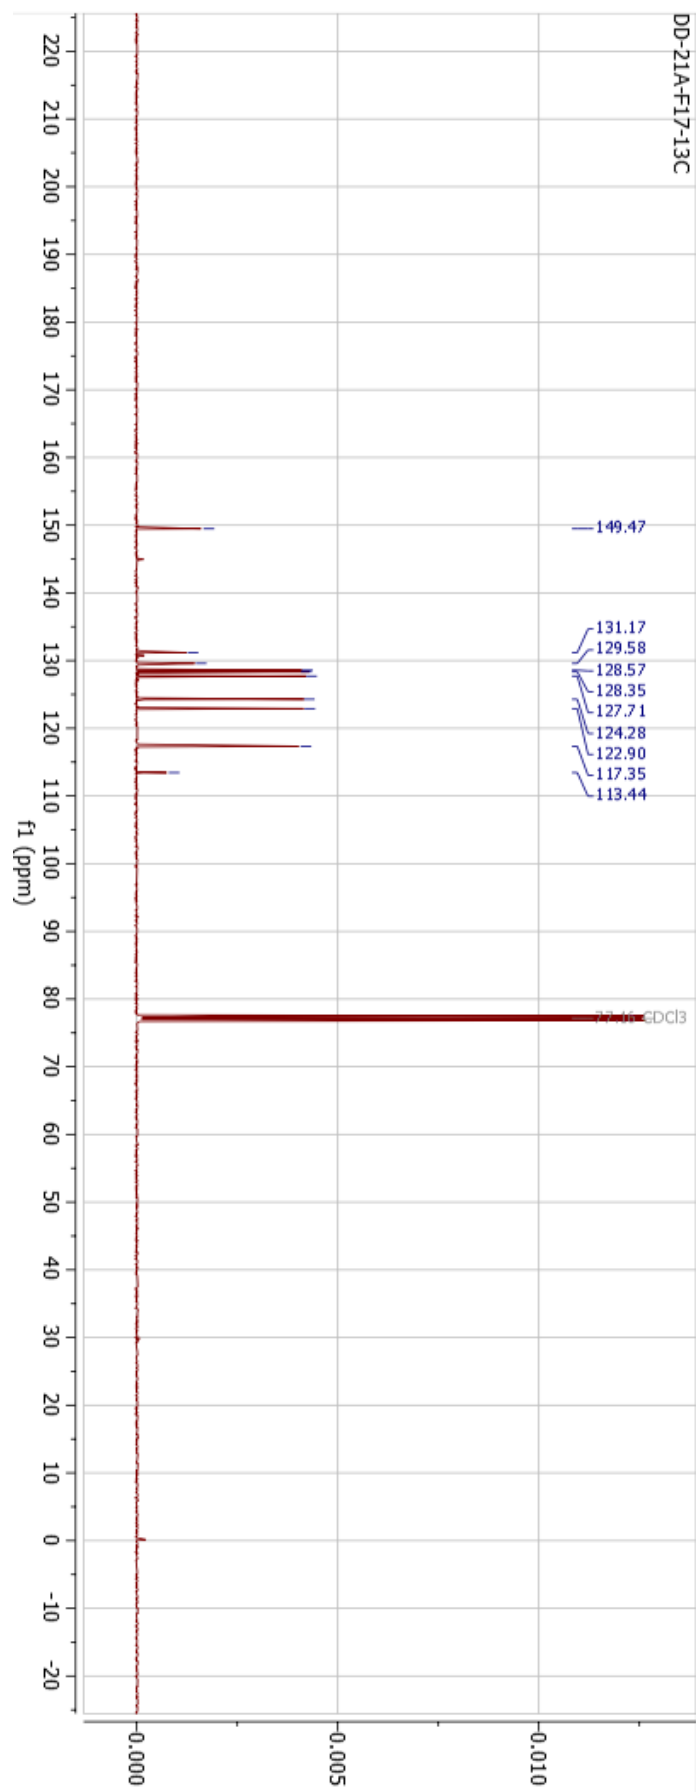

Figure S84.  $^{13}\text{C}$  NMR of Product 27.

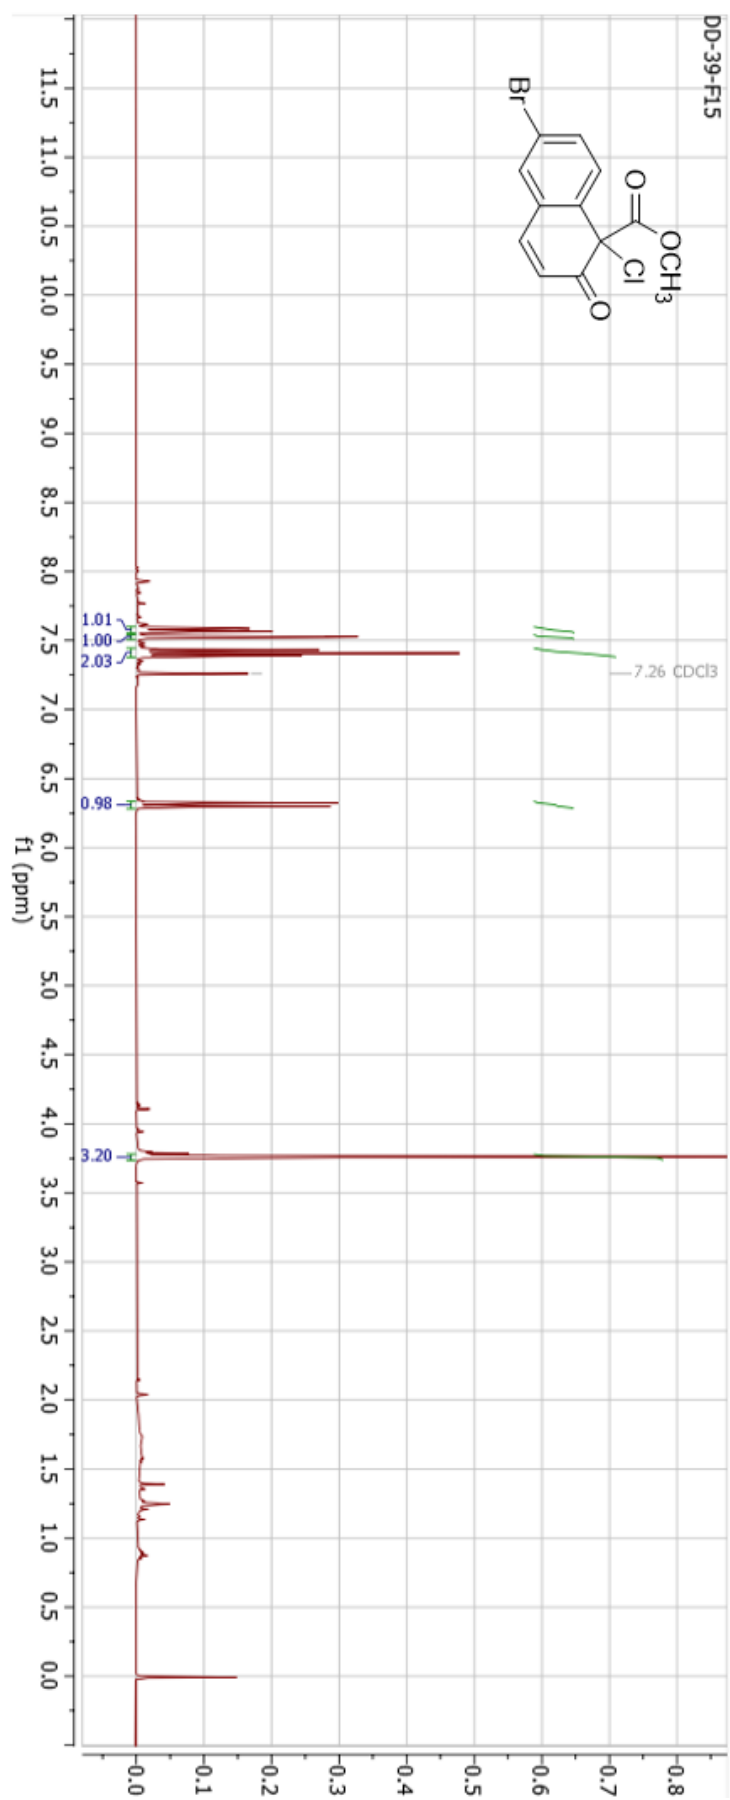

Figure S85. <sup>1</sup>H NMR of Product 28.

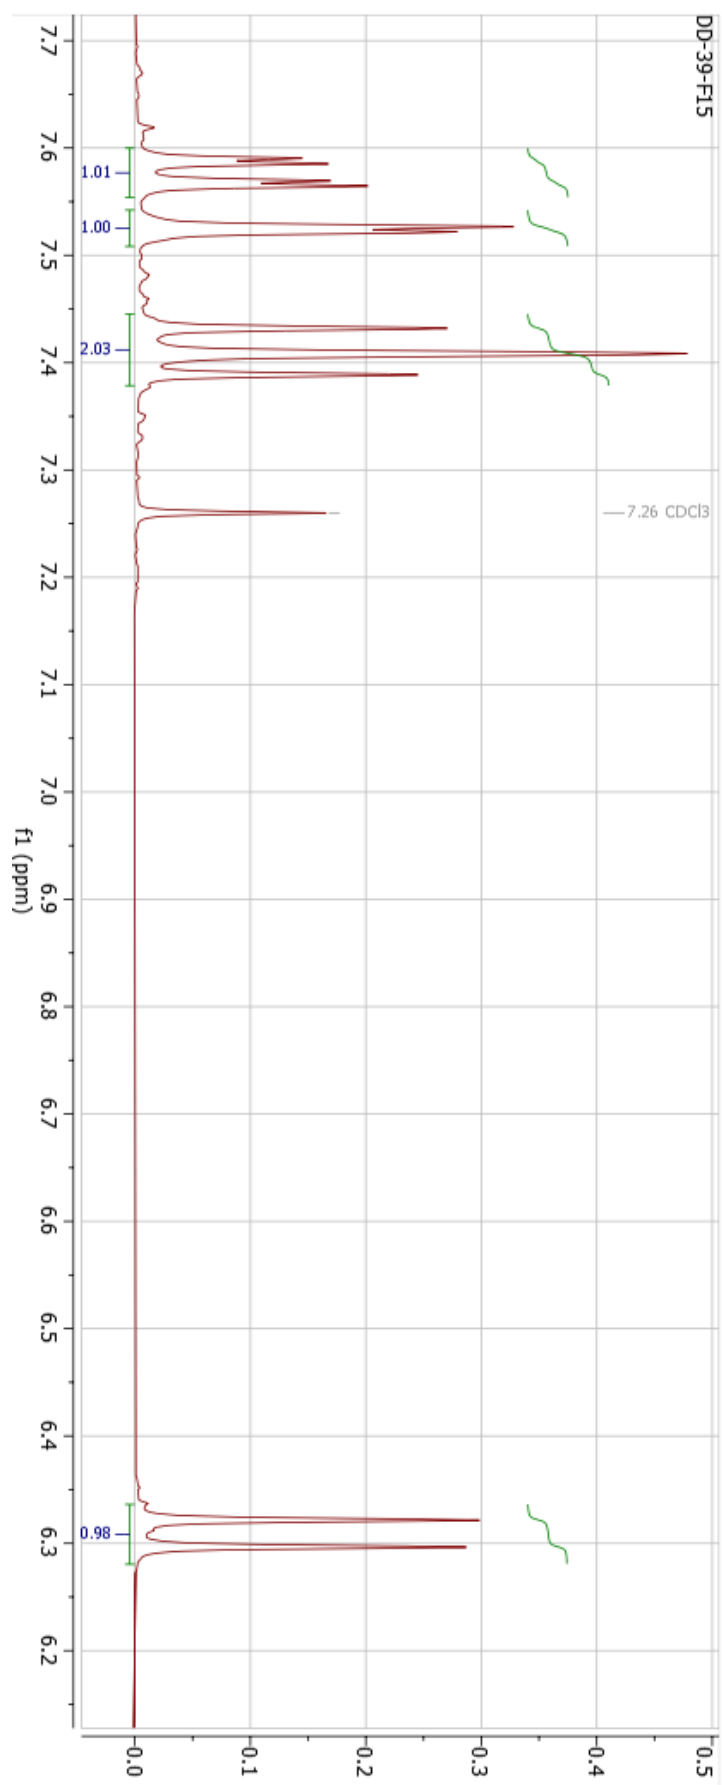

**Figure S86.** Zoomed in aromatic region of  $^1\text{H}$  NMR of Product 28.

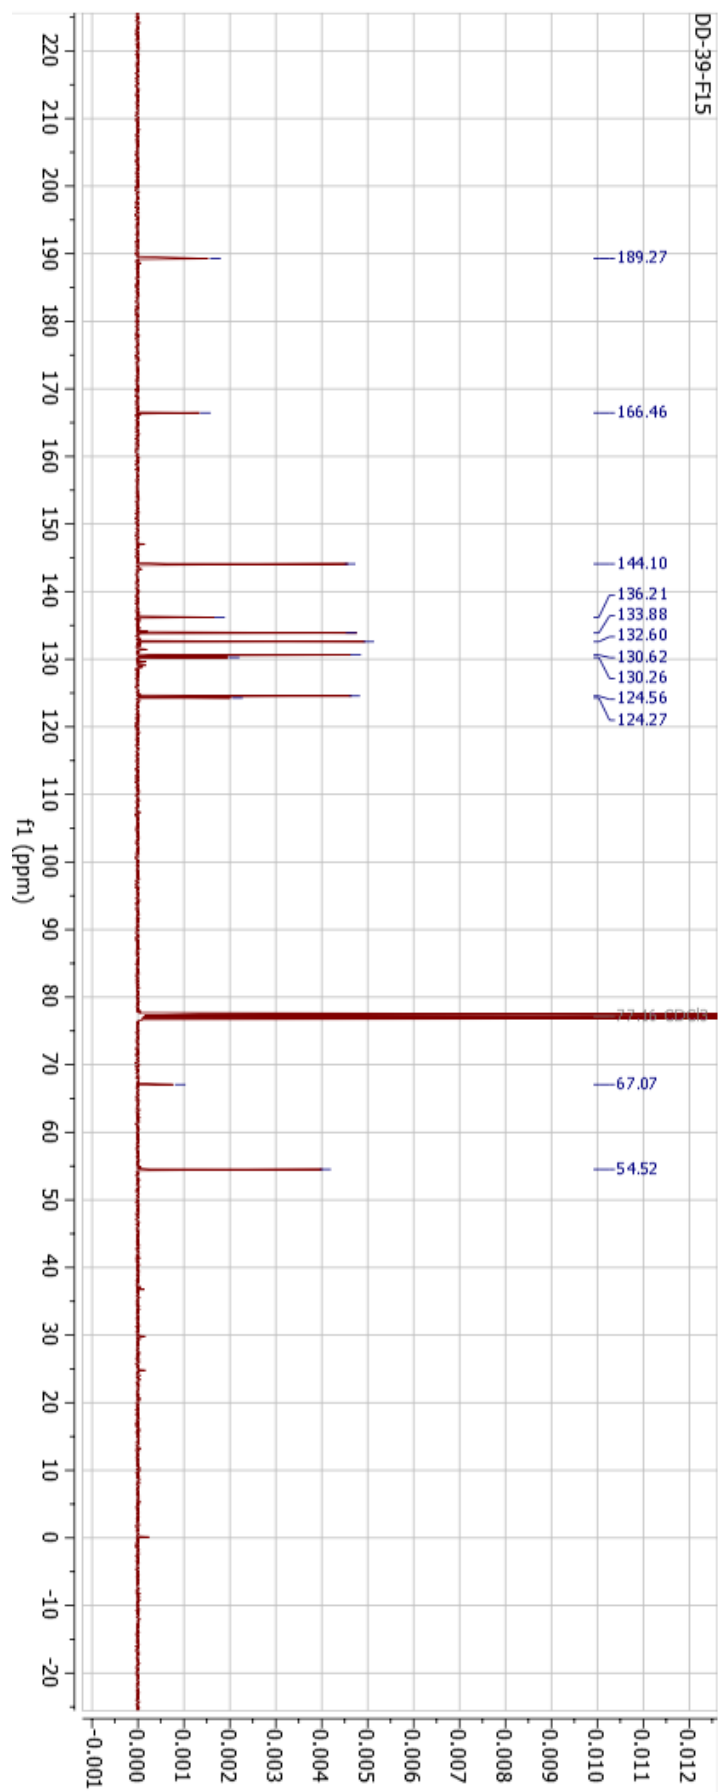

Figure S87.  $^{13}\text{C}$  NMR of Product 28.

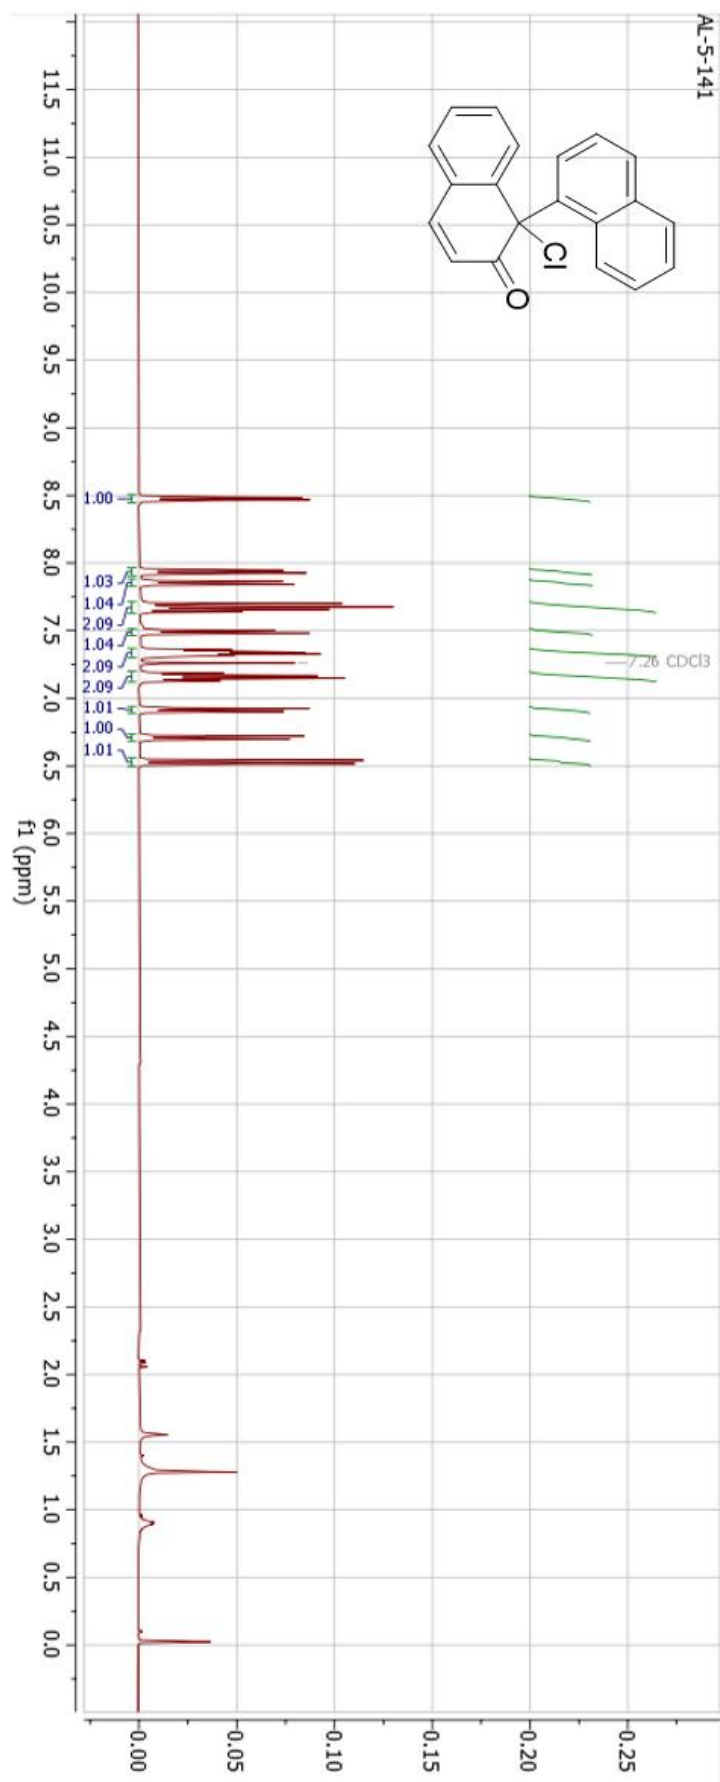

Figure S88. <sup>1</sup>H NMR of Product 29.

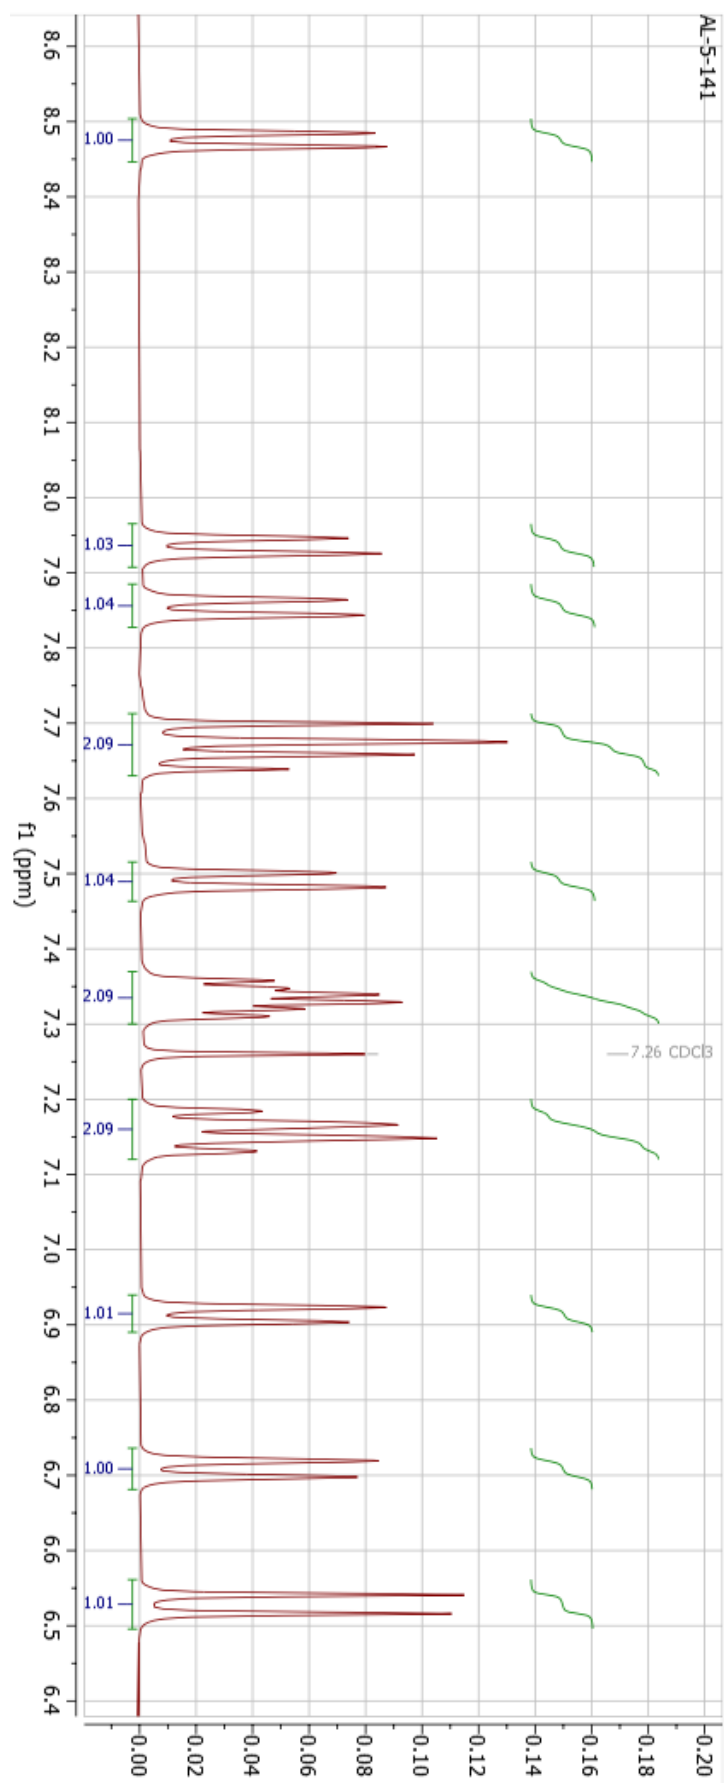

Figure S89. Zoomed in aromatic region of  $^1\text{H}$  NMR of Product 29.



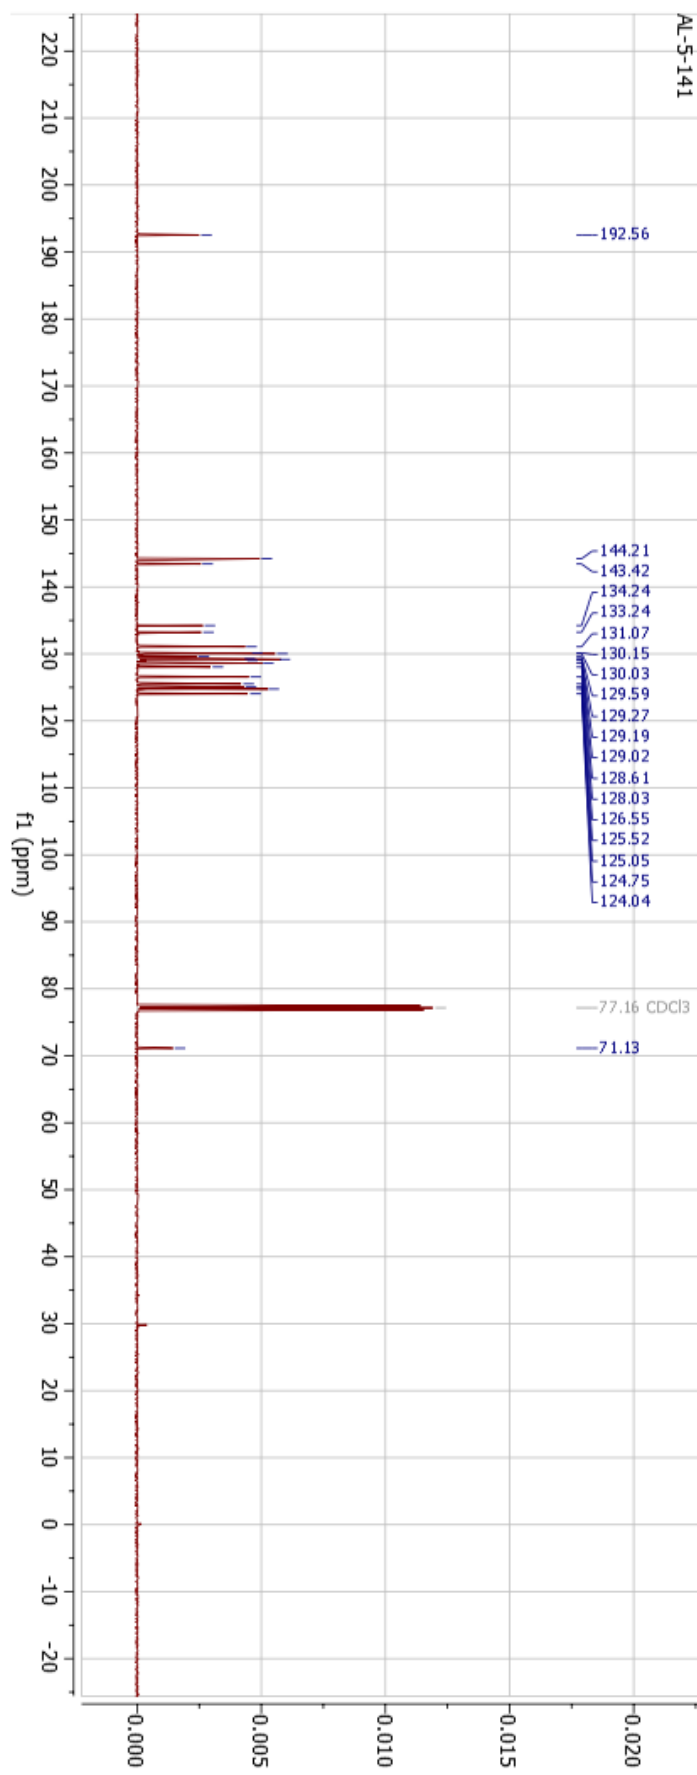

Figure S90.  $^{13}\text{C}$  NMR of Product 29.

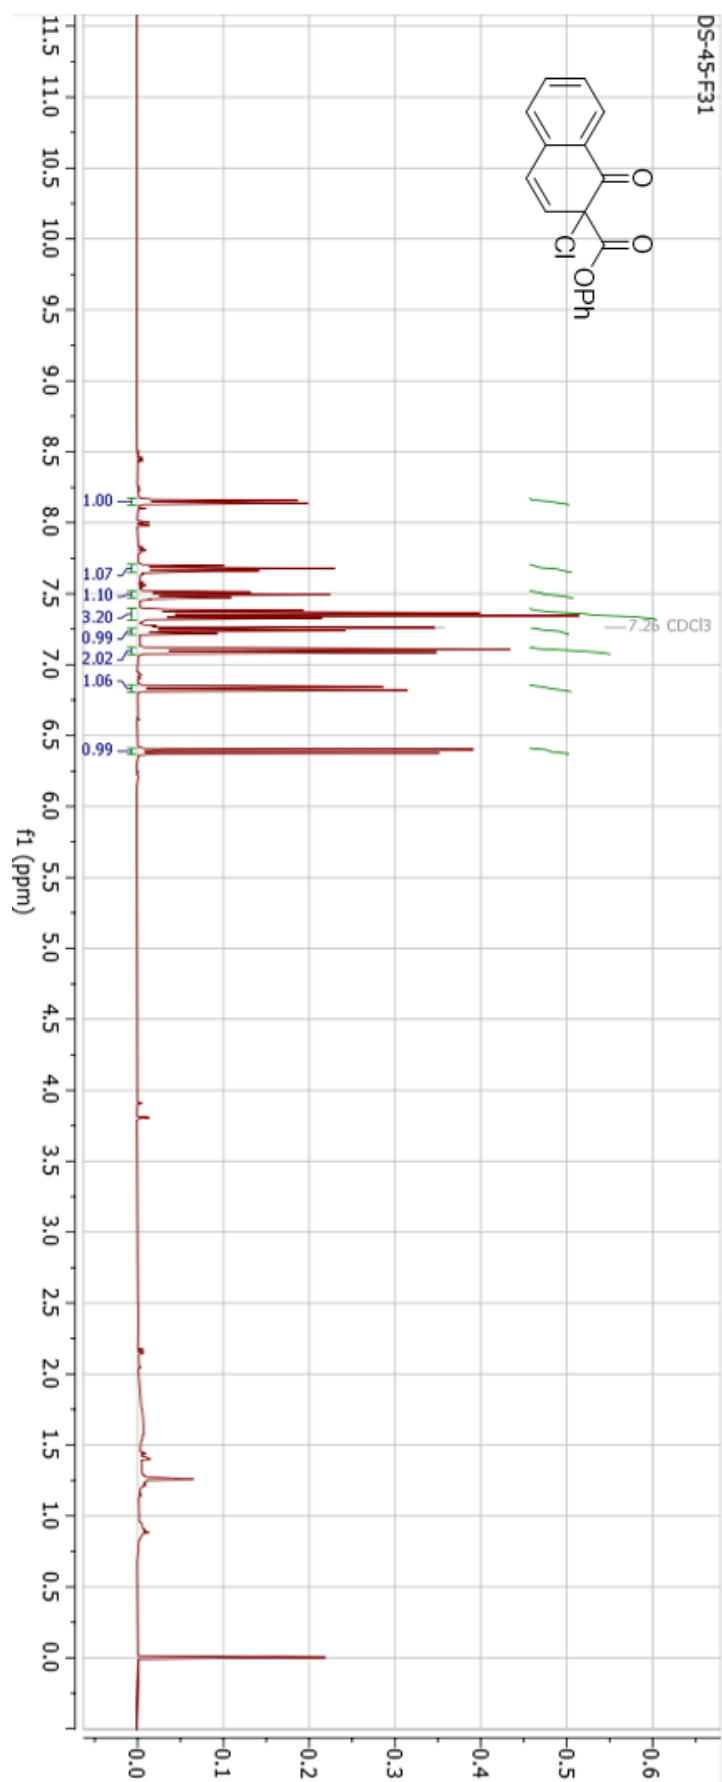

Figure S91. <sup>1</sup>H NMR of Product 30.

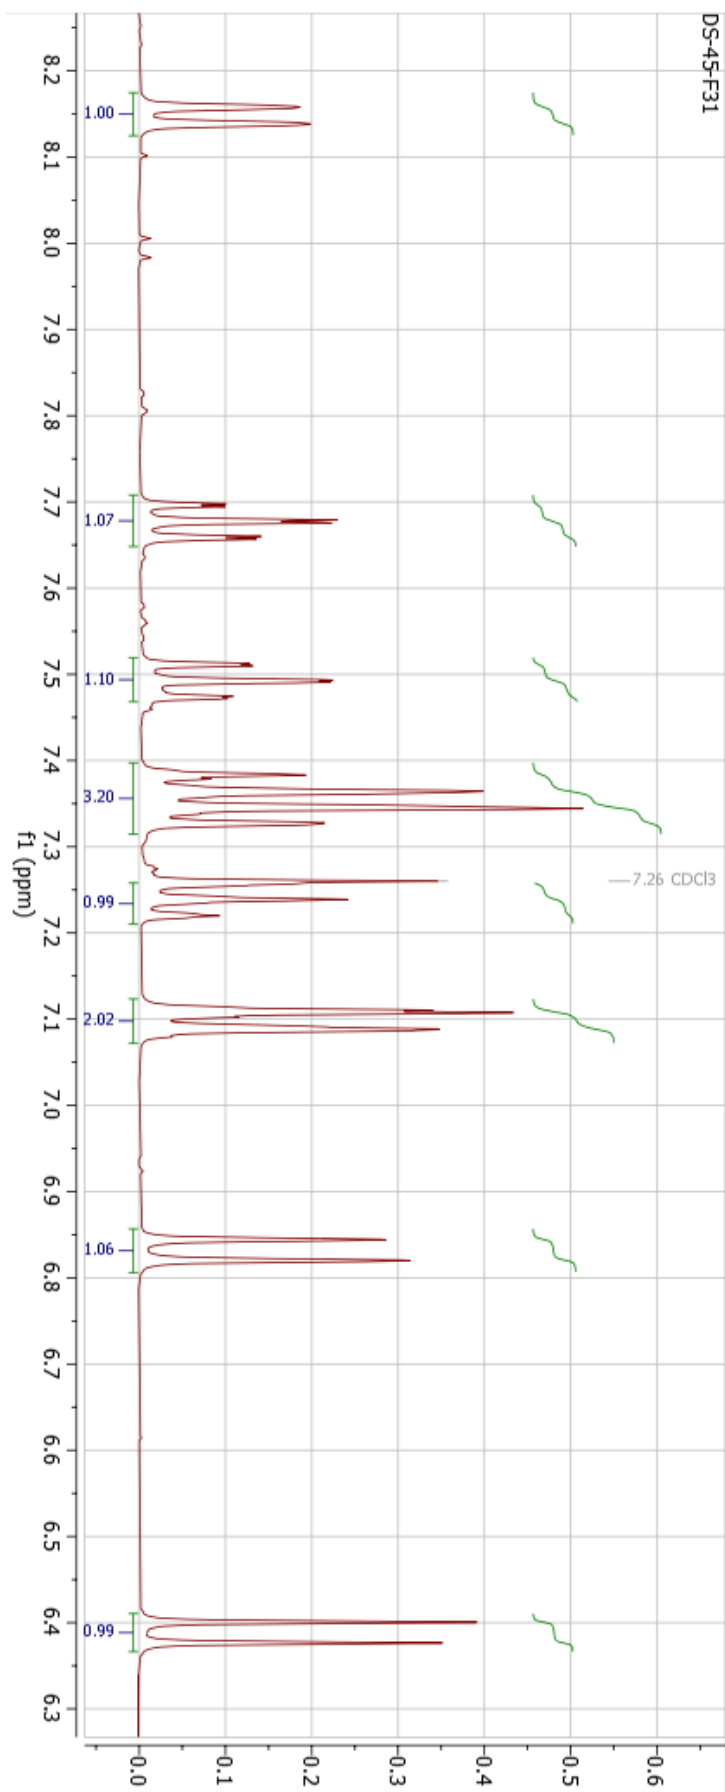

Figure S92. Zoomed in aromatic region of  $^1\text{H}$  NMR of Product 30.

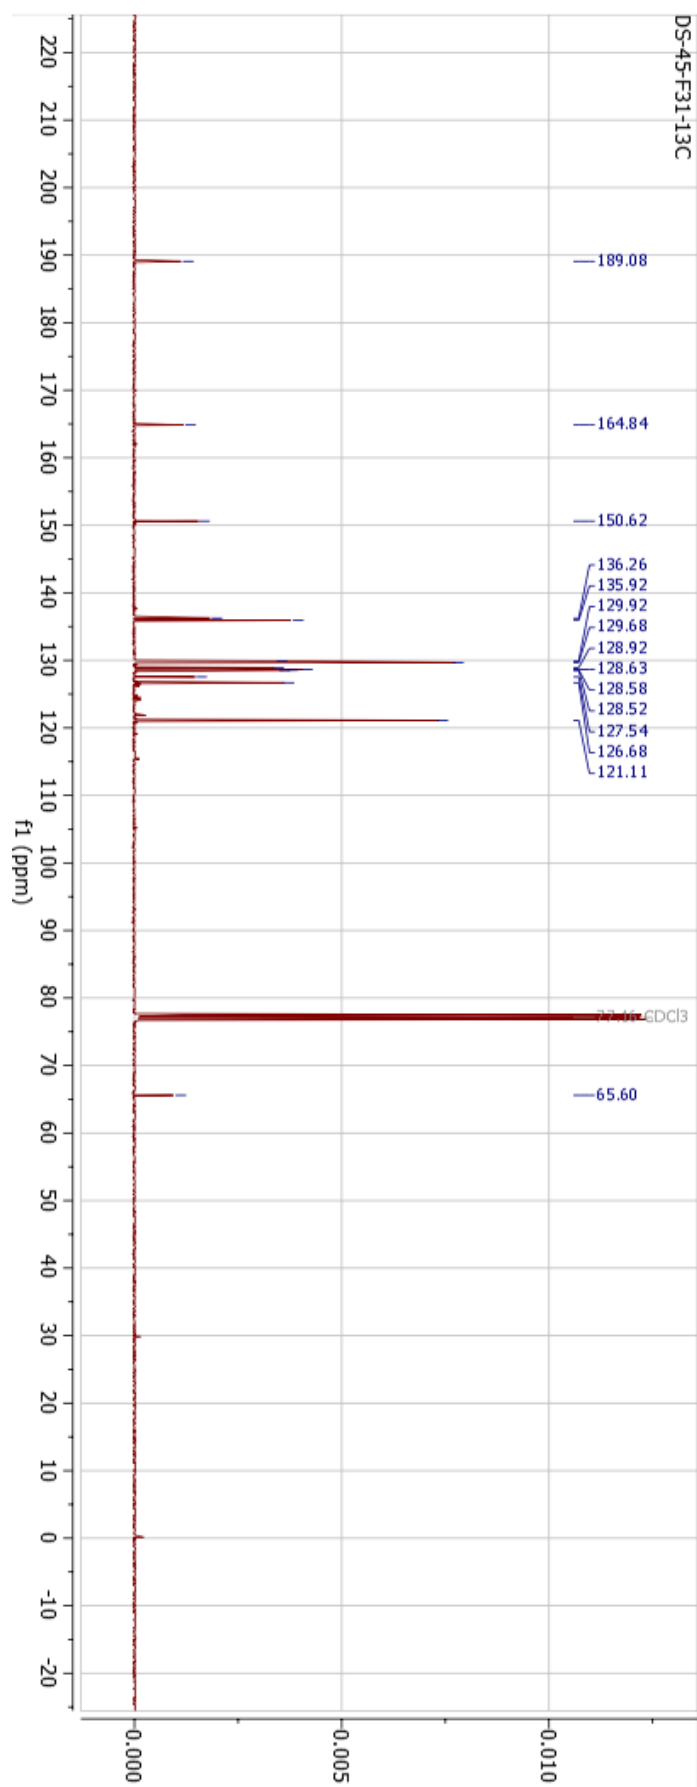

Figure S93.  $^{13}\text{C}$  NMR of Product 30.

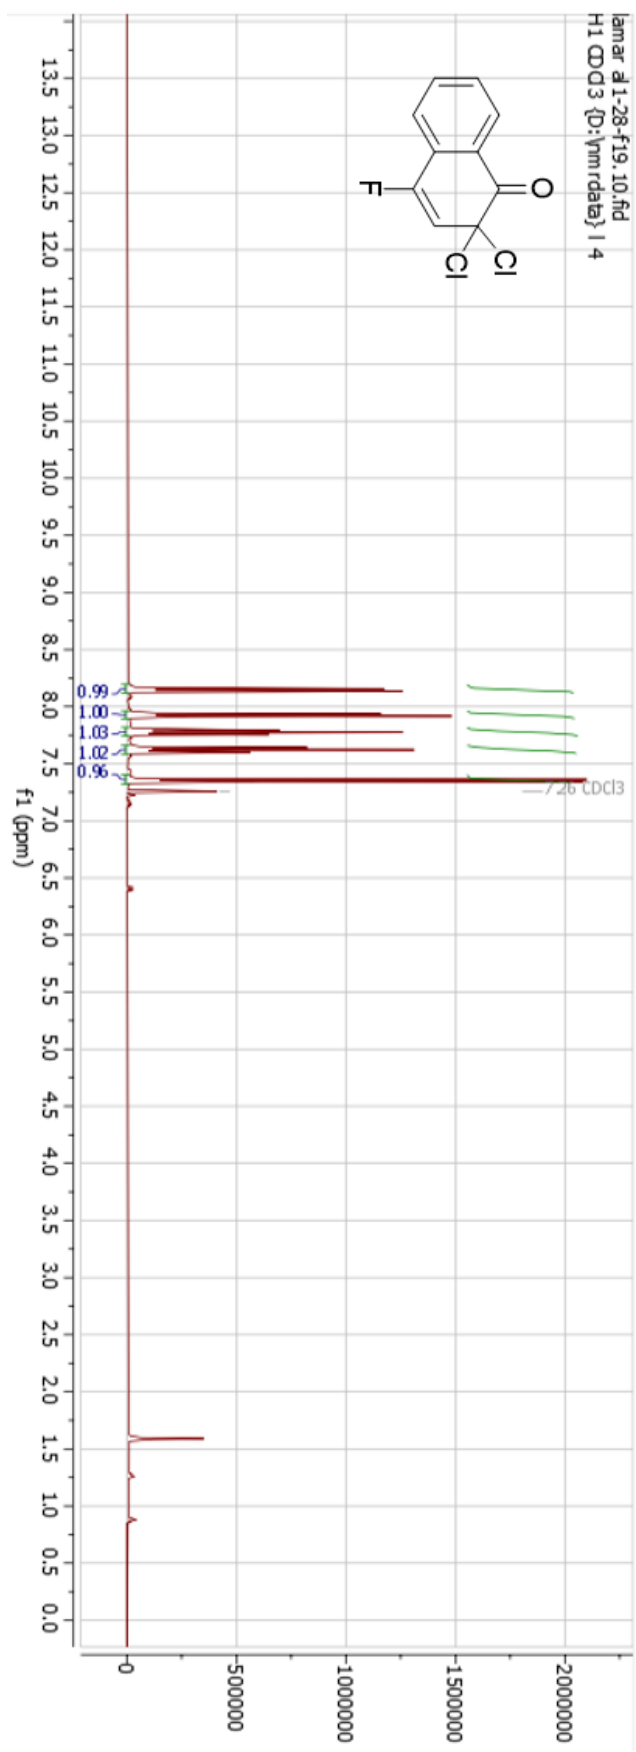

Figure S94. <sup>1</sup>H NMR of Product 31.

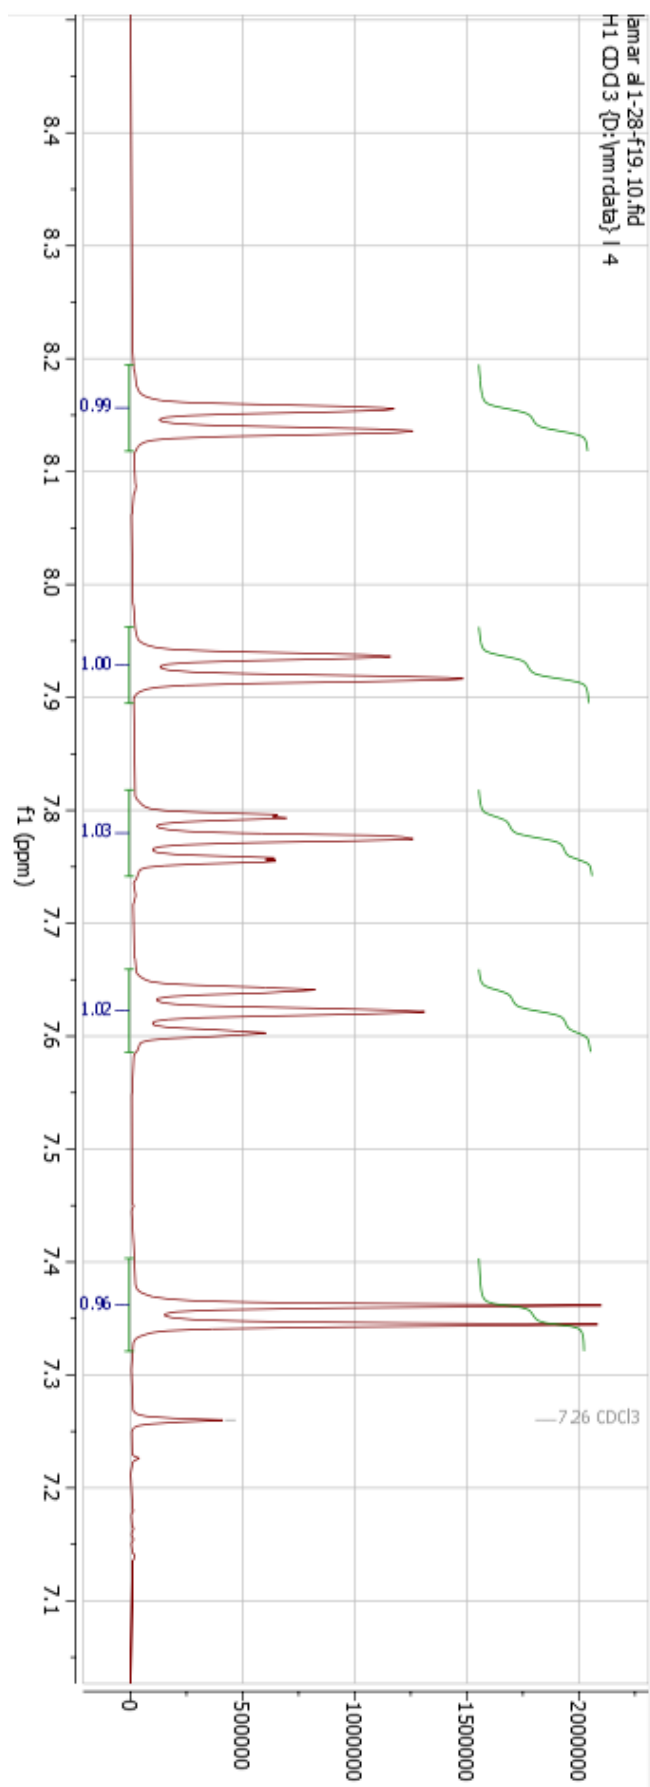

**Figure S95.** Zoomed in aromatic region of  $^1\text{H}$  NMR of Product **31**.

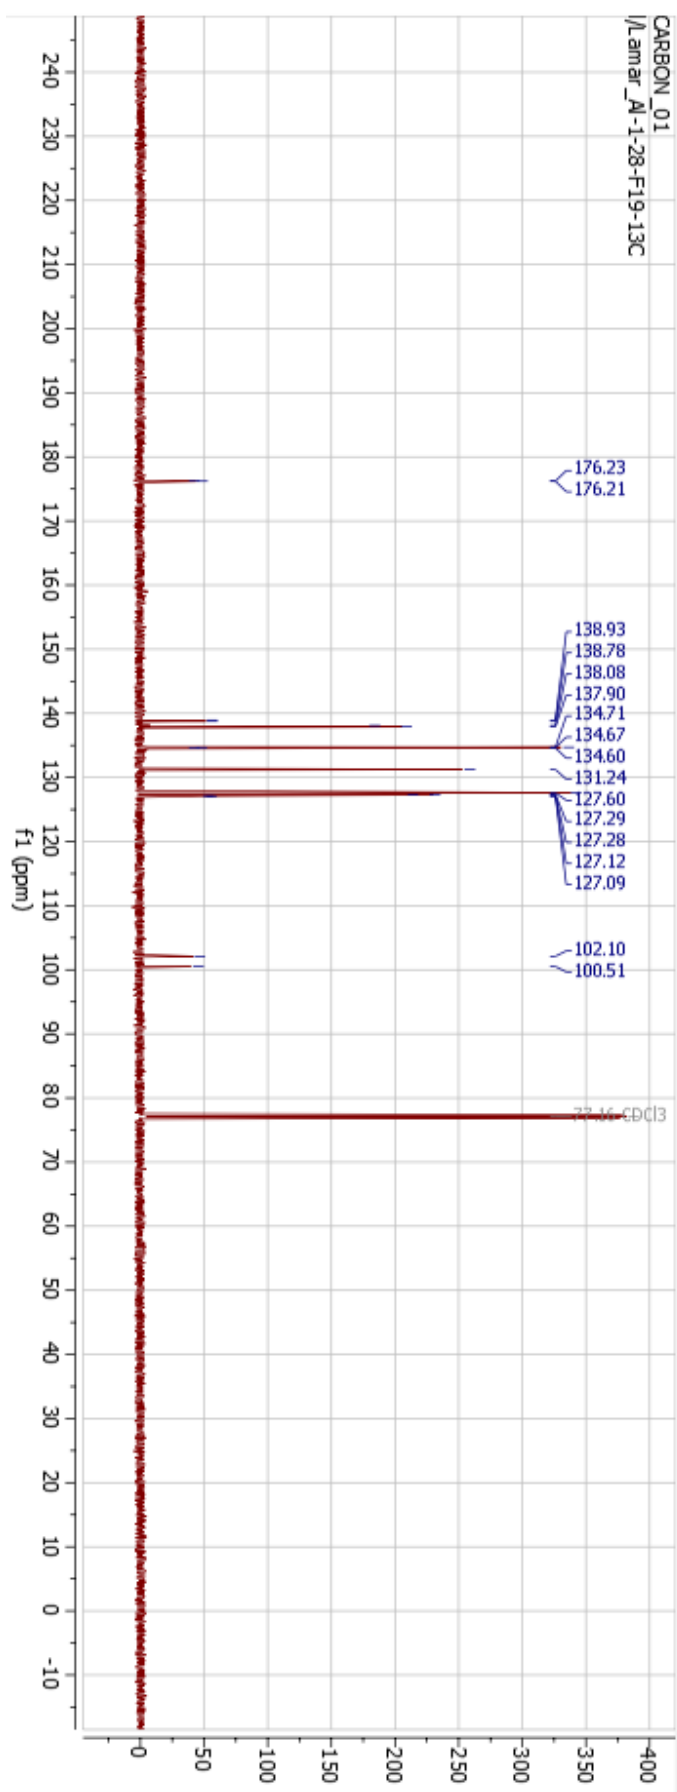

Figure S96.  $^{13}\text{C}$  NMR of Product 31.

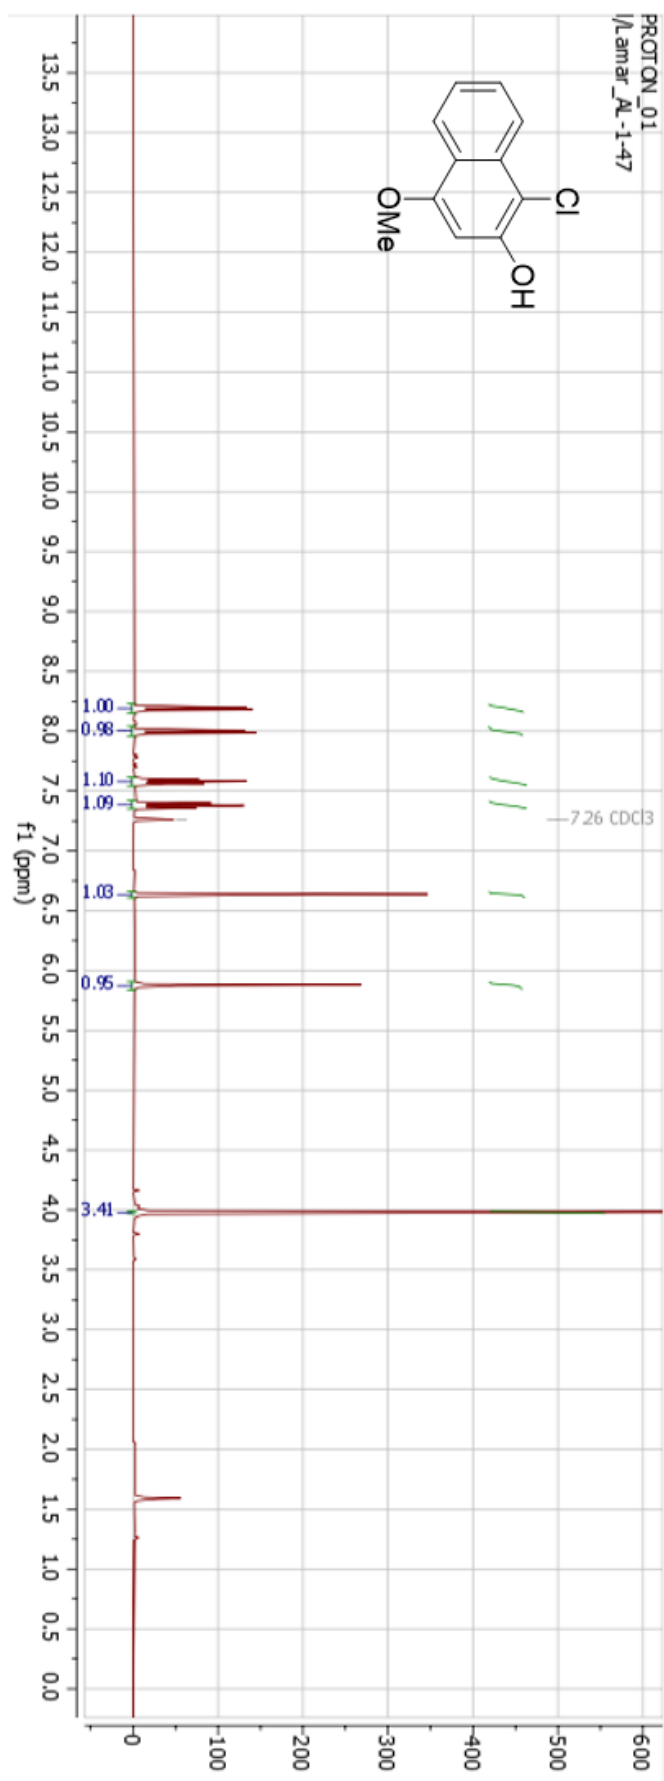

Figure S97. <sup>1</sup>H NMR of Product 32.



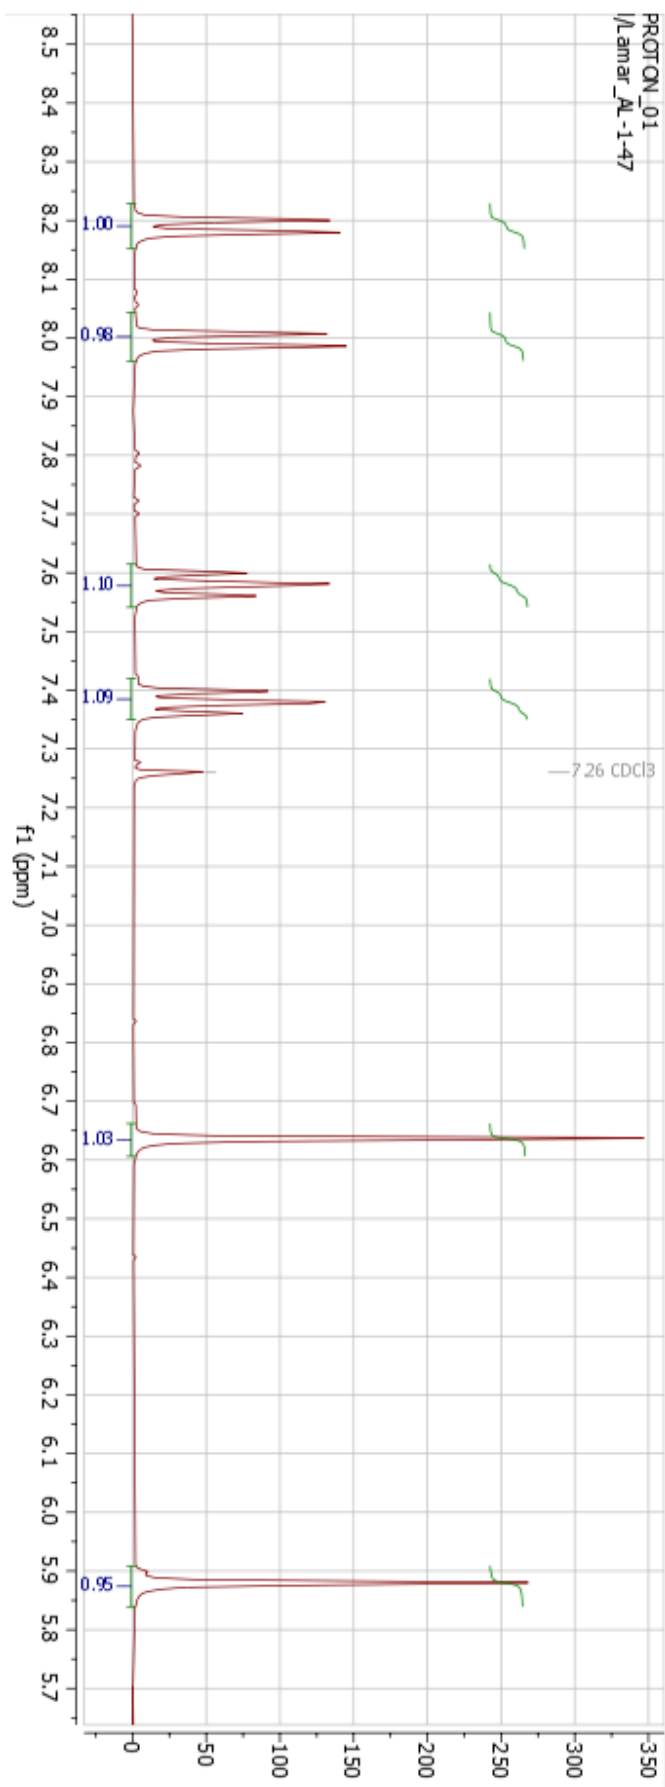

**Figure S98.** Zoomed in aromatic region of  $^1\text{H}$  NMR of Product **32**.

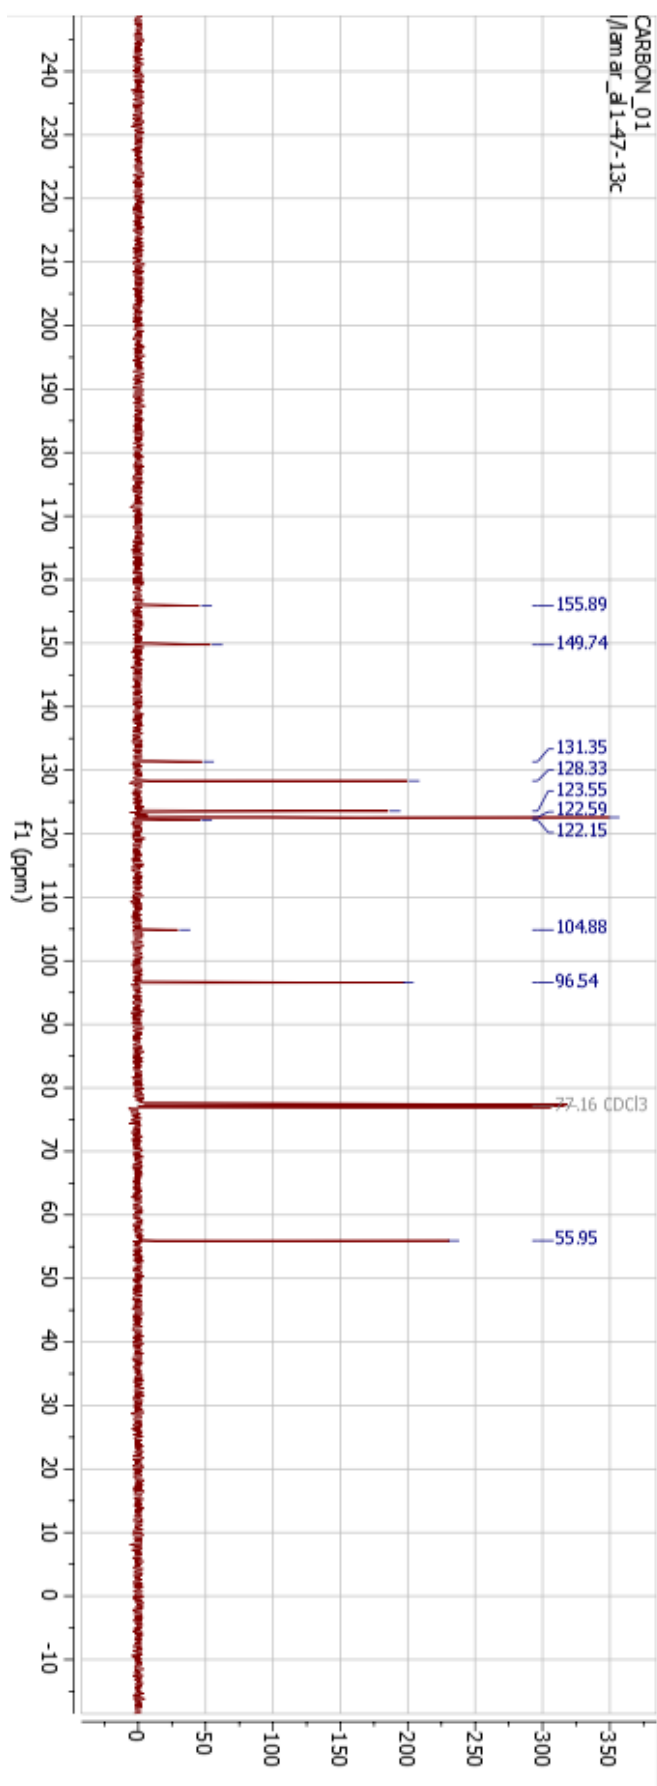

Figure S99. <sup>13</sup>C NMR of Product 32.

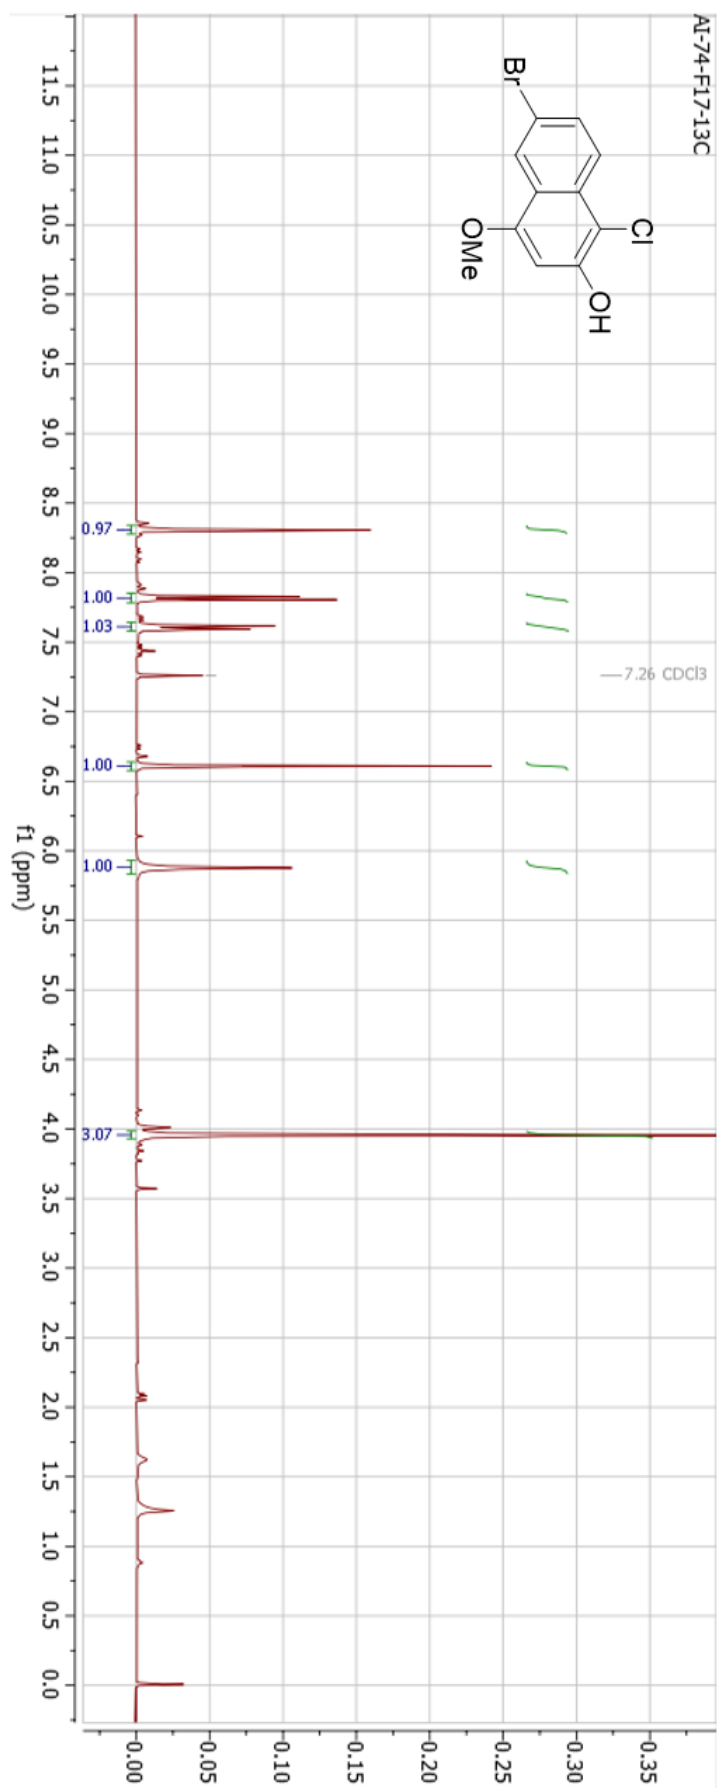

Figure S100. <sup>1</sup>H NMR of Product 33.

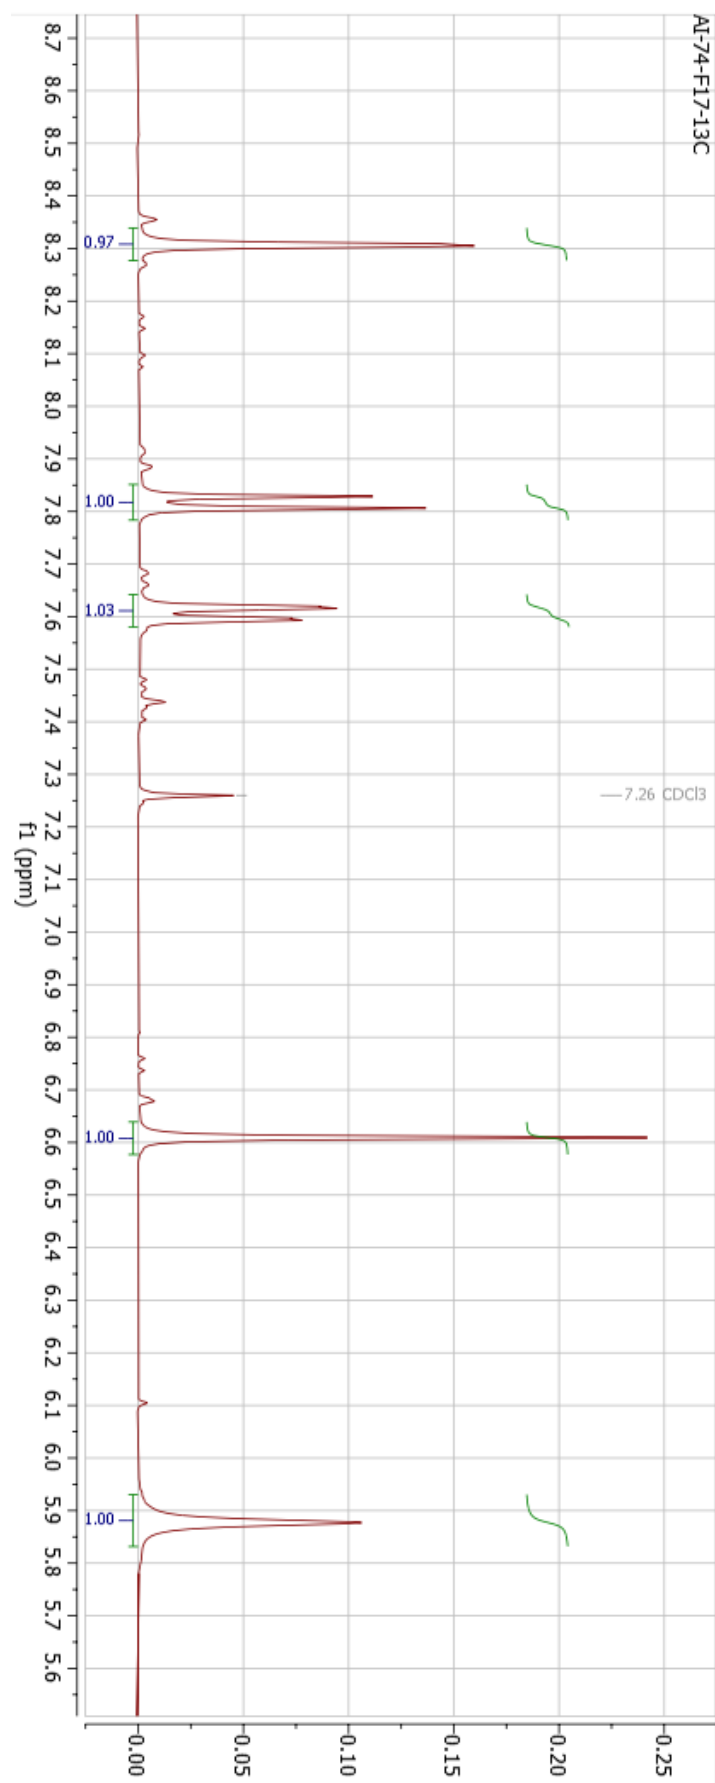

**Figure S101.** Zoomed in aromatic region of  $^1\text{H}$  NMR of Product **33**.

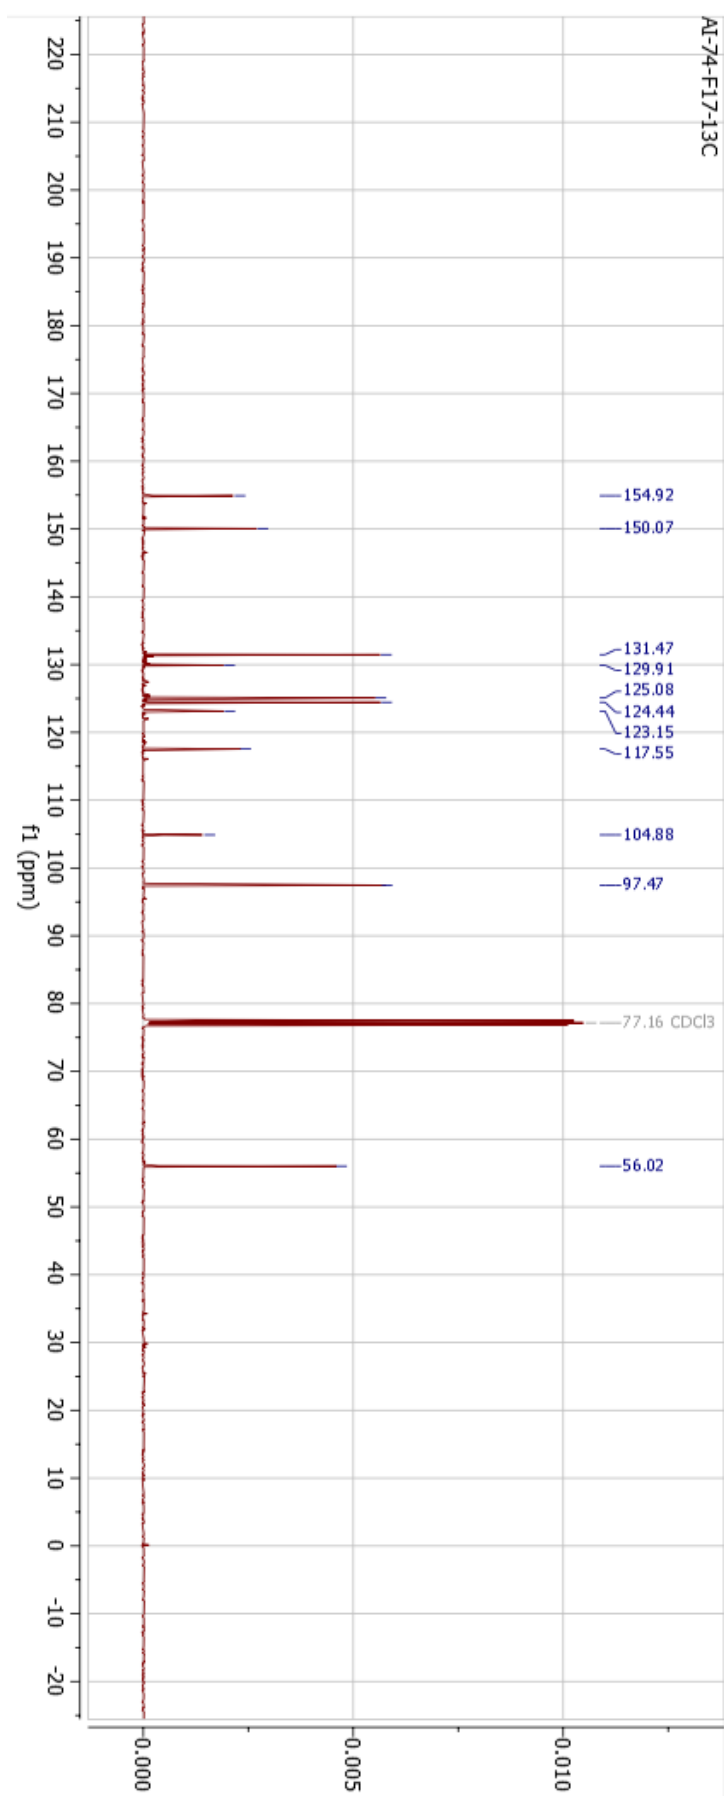

Figure S102.  $^{13}\text{C}$  NMR of Product 33.

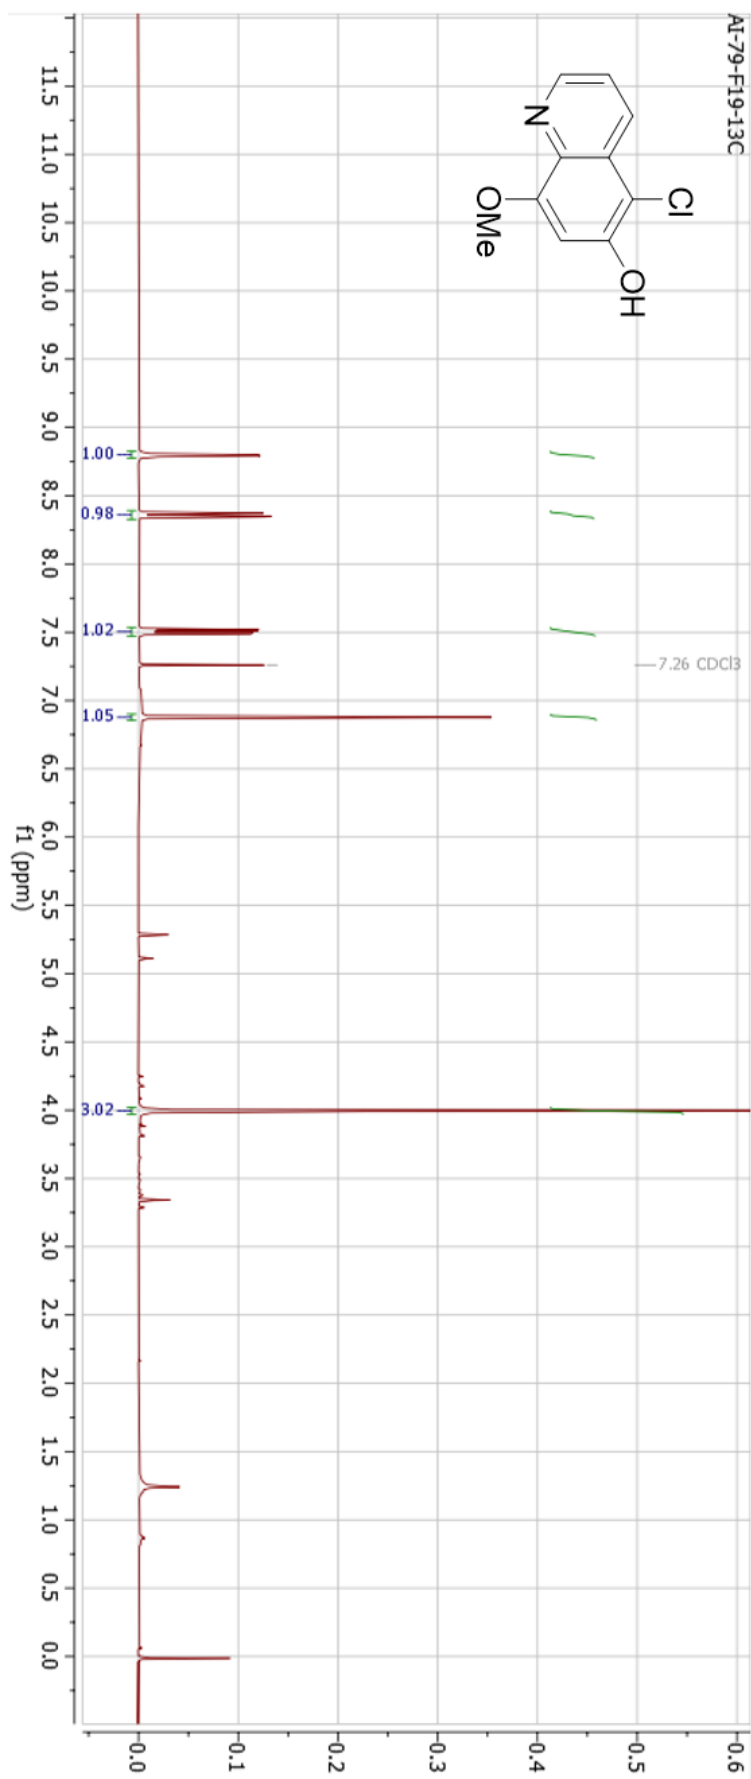

Figure S103. <sup>1</sup>H NMR of Product **34**.

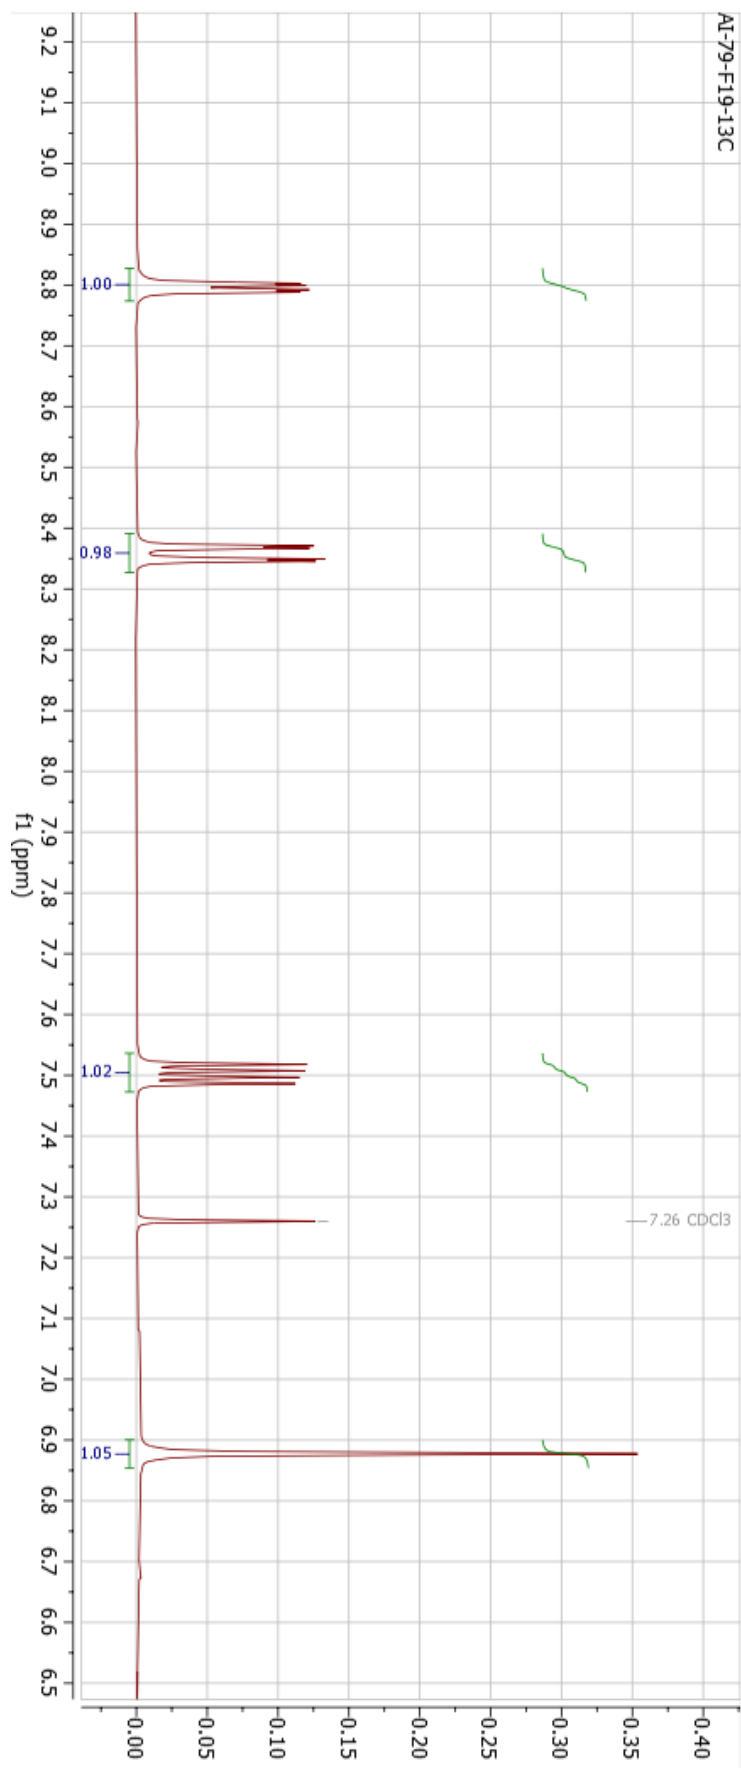

**Figure S104.** Zoomed in aromatic region of  $^1\text{H}$  NMR of Product **34**.

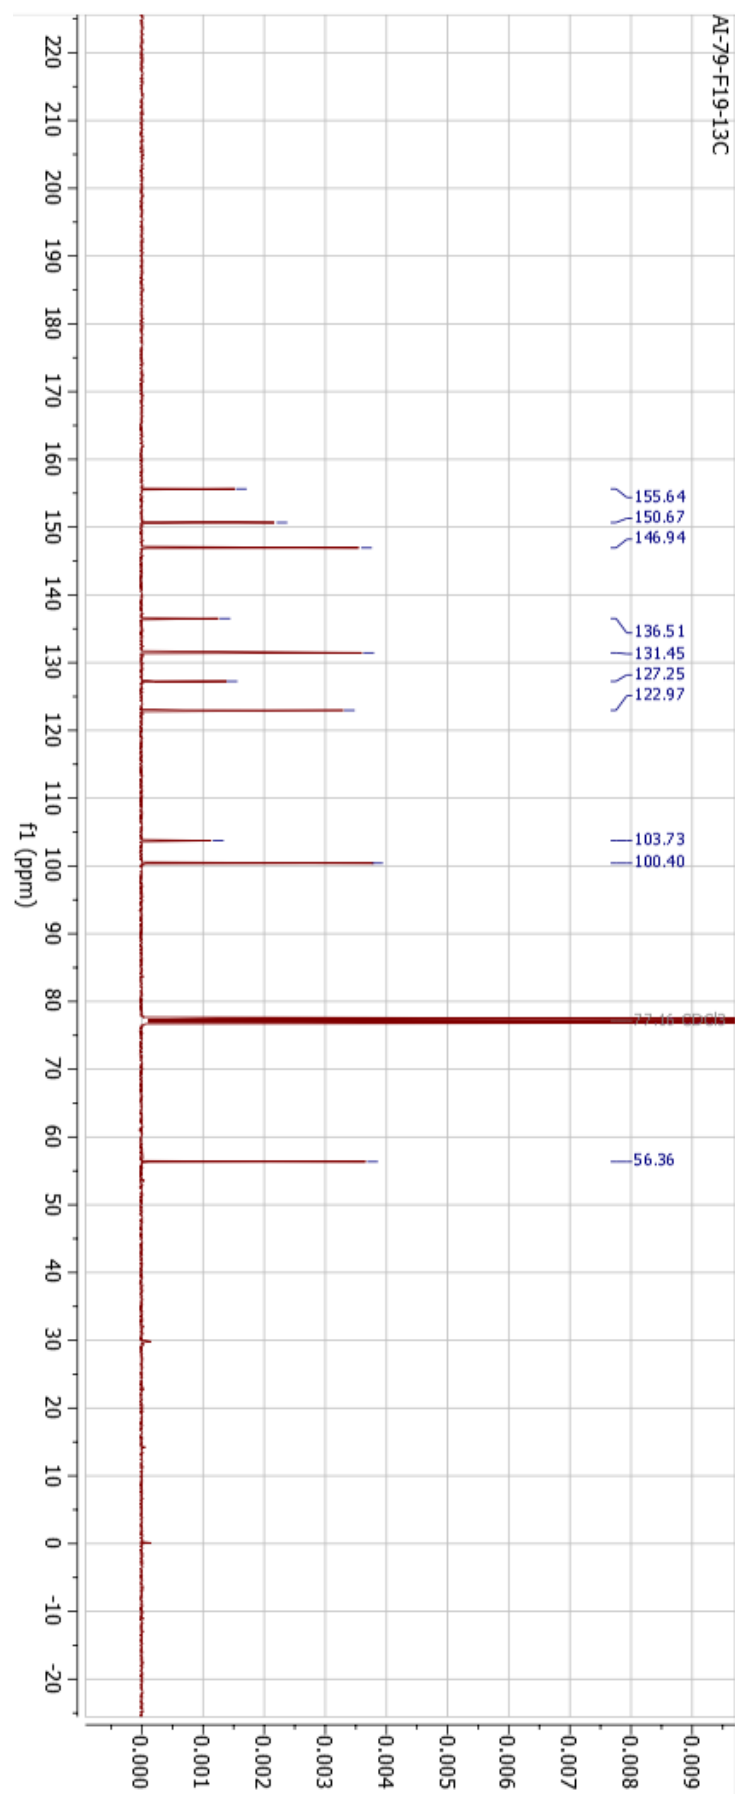

Figure S105.  $^{13}\text{C}$  NMR of Product **34**.
